# Supplementary material
Source: PubMed Central journal article supplement (PMC4244832)
Supplement: ja510135t_si_001.pdf [file ja510135t_si_001.pdf]

# Synthesis of $\alpha$ -Amino Acid Derivatives and Peptides via Enantioselective Addition of Masked Acyl Cyanides to Imines

Kin S. Yang and Viresh H. Rawal\*

*Searle Chemistry Laboratory, Department of Chemistry, The University of Chicago  
5735 South Ellis Avenue, Chicago, IL 60637*

## **Table of Contents**

|                                                                       |    |
|-----------------------------------------------------------------------|----|
| General Information .....                                             | 2  |
| General Procedure for the optimization of MAC addition to Imines..... | 3  |
| Procedures for Imine Addition Reactions .....                         | 4  |
| Experimental protocols for the unmasking <b>3</b> .....               | 11 |
| Selected NMR Spectra.....                                             | 18 |
| HPLC Traces of Racemic and Enantioenriched Compounds.....             | 43 |

## General Information

Unless stated otherwise, reactions were performed in oven-dried glassware under a nitrogen atmosphere. Solvents were purified over activated alumina using an Innovative Technology solvent purification system. Acetylmalononitrile, peracetic acid, tetrabutylammonium fluoride solution (THF, 1.0 M), Tris(dimethylamino)sulfonium difluorotrimethylsilicate (TASF), pyrrolidine, benzyl amine, glycine methyl ester HCl, valine methyl ester HCl, phenylalanine ethyl ester HCl, and trifluoroacetic acid were purchased from Aldrich and used as received. Ambient temperature refers to 22–26 °C. Lower temperatures were maintained using ice (0 °C), a Thermo NEXLAB Cryotrol (–45 to 23 °C), Acetone/CO<sub>2</sub>(s) (–78 °C) baths. Thin-layer chromatography (TLC) was performed using Whatman silica gel 60 Å F254 plates (250 μm) with F-254 fluorescent indicator and visualized by UV fluorescence quenching, ceric ammonium molybdate or potassium permanganate staining. SiliCycle SiliaFlash P60 silica gel (particle size 40–63 μm) was used for flash chromatography. Chiral HPLC was performed on a Agilent HPLC with a Chiralcel® or ChiralPak® OD-H, IA, AS-H or AD-H column (250 mm x 10 mm, 5 μm particle size, 1.0 mL/min flow rate) equipped with a guard, employing a mixture of isopropanol and hexanes. Melting points were measured on a Thomas Hoover Uni-Melt capillary melting point apparatus and are uncorrected. <sup>1</sup>H and <sup>13</sup>C NMR spectra were recorded on Bruker DRX-500 and DMX-500 (at 500 MHz and 125 MHz, respectively) and are reported relative to Me<sub>4</sub>Si (δ 0.0) or residual solvent signals unless otherwise stated. <sup>13</sup>C NMR spectra were calibrated to residual solvent signals (CHCl<sub>3</sub> at 77.23 ppm) Data for <sup>1</sup>H NMR spectra are reported as follows: chemical shift (δ ppm) (multiplicity, coupling constant (Hz), integration). Infrared spectra were recorded on a Nicolet 6700 FT-IR spectrometer and are reported in frequency of absorption (cm<sup>-1</sup>) using NaBr salt plates using a thin film. High-resolution mass spectra were recorded on an Agilent 6224 Tof-MS (with positive Electrospray ionization mode[+ESI]). Optical rotations were measured on a Perkin Elmer 141 polarimeter using a 100 mm path-length cell.

Imines (**1o-r**)<sup>1</sup>, and **1s**<sup>2</sup> were prepared according to literature procedure. MAC reagent **2** was prepared as described previously.<sup>3</sup> Catalyst **III** prepared according to reported procedure.<sup>4</sup>

---

(1) Best, D.; Kujawa, S.; Lam, H.W. *J. Am. Chem. Soc.* **2012**, *134*, 18193.

(2) Kanazawa, A.M.; Denis, J.; Greene, A.E. *J. Org. Chem.* **1994**, *59*, 1238.

(3) (a) Nemoto, H.; Li, X. M.; Ma, R. J.; Suzuki, I.; Shibuya, M. *Tetrahedron Lett.* **2003**, *44*, 73.; (b) Yang, K. S.; Nibbs, A. E.; Turkmen, Y. E.; Rawal, V. H. *J. Am. Chem. Soc.* **2013**, *135*, 16050.

(4) Wang, Y.; Li, H. M.; Wang, Y. Q.; Liu, Y.; Foxman, B. M.; Deng, L. *J. Am. Chem. Soc.* **2007**, *129*, 6364.

## General Procedure for the optimization of MAC addition to Imines.

To a 1 dram (4 mL) vial equipped with a magnetic stir bar was added imine **1** (10.3 mg, 0.05 mmol). A solution of MAC reagent **2** (0.05 mmol) in solvent was added and the solution was stirred. Catalyst was added as a solid and the vial was sealed. The reaction was monitored by crude analysis of <sup>1</sup>H NMR aliquots. The reaction mixture was filtered through a plug of silica, and analyzed by chiral HPLC for determination of enantioselectivity.

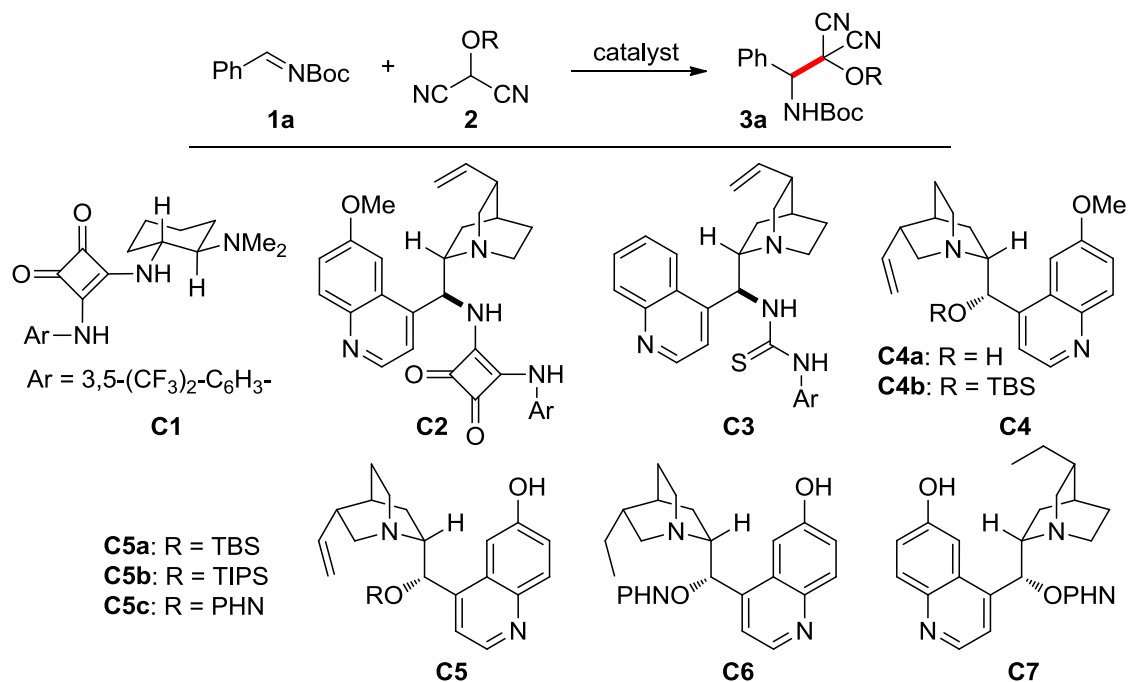

| entry <sup>a</sup> | catalyst   | R   | solvent (M)              | temp (°C) | time (h) | conv. <sup>b</sup> (%) | e.r. <sup>c</sup> |
|--------------------|------------|-----|--------------------------|-----------|----------|------------------------|-------------------|
| 1                  | <b>C1</b>  | MOM | CHCl <sub>3</sub> (0.08) | 23        | 3        | >95                    | 26.5:73.5         |
| 2                  | <b>C2</b>  | MOM | CHCl <sub>3</sub> (0.08) | 23        | 3        | >95                    | 85.5:14.5         |
| 3                  | <b>C3</b>  | MOM | CHCl <sub>3</sub> (0.08) | 23        | 3        | >95                    | 67.5:32.5         |
| 4                  | <b>C4a</b> | TBS | toluene (0.3)            | 23        | 1.5      | >95                    | 41.5:58.5         |
| 5                  | <b>C4b</b> | TBS | toluene (0.3)            | 23        | 1.5      | 80                     | 47:53             |
| 6                  | <b>C5a</b> | TBS | toluene (0.3)            | 23        | 1.5      | >95                    | 86.5:13.5         |
| 7                  | <b>C5a</b> | TBS | CHCl <sub>3</sub> (0.3)  | 23        | 1.5      | >95                    | 90:10             |
| 8                  | <b>C5a</b> | TBS | CHCl <sub>3</sub> (0.3)  | -40       | 17       | >95                    | 94:6              |
| 9                  | <b>C5b</b> | TBS | CHCl <sub>3</sub> (0.1)  | -40       | 17       | 70                     | 94.5:5.5          |
| 10                 | <b>C5b</b> | MOM | CHCl <sub>3</sub> (0.1)  | -40       | 17       | 77                     | 84:16             |
| 11                 | <b>C5c</b> | TBS | CHCl <sub>3</sub> (0.3)  | -40       | 23       | 69                     | 95.5:4.5          |
| 12                 | <b>C6</b>  | TBS | CHCl <sub>3</sub> (0.2)  | -40       | 20       | 92                     | 97:3              |
| 13                 | <b>C6</b>  | TBS | CHCl <sub>3</sub> (0.05) | 23        | 1        | 50                     | 95:5              |
| 14                 | <b>C6</b>  | TBS | toluene (0.05)           | 23        | 1        | 55                     | 96:4              |
| 15                 | <b>C6</b>  | TBS | toluene (0.1)            | -20       | 21       | 81                     | 95:5              |
| 16                 | <b>C6</b>  | TBS | toluene (0.3)            | 23        | 1        | >95                    | 95:5              |
| 17 <sup>d</sup>    | <b>C6</b>  | TBS | toluene (0.07)           | 23        | 1        | 53                     | 96:4              |
| 18 <sup>d</sup>    | <b>C7</b>  | TBS | toluene (0.07)           | 23        | 1        | 40                     | 6.5:93.5          |

<sup>a</sup>Conditions: **1a** (0.05 mmol), **2** (0.05 mmol), catalyst (5 mol %). <sup>b</sup>% conversion determined by <sup>1</sup>H NMR. <sup>c</sup>e.r. determined by chiral stationary phase HPLC. <sup>d</sup> Catalyst (2.5 mol%).

### General Procedure for the addition of MAC Reagents to Imines

To a 2 dram (8 mL) vial equipped with a magnetic stir bar was added imine **1** (0.33 mmol). A solution of TBS MAC reagent **2** (58.9 mg, 0.3 mmol) in 4.5 mL of toluene was added and the solution was stirred at 23 °C. Catalyst **III** (3.66 mg, 0.0075 mmol, 2.5 mol %) was added as a solid and the vial was sealed. The reaction was monitored by <sup>1</sup>H NMR, and upon completion, was concentrated to afford a sticky residue. Purification by flash column chromatography produced the desired product **3**.

## Imine Addition Reactions

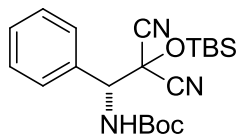

(*R*)-*tert*-butyl (2-((*tert*-butyldimethylsilyl)oxy)-2,2-dicyano-1-phenylethyl)carbamate

**(3a)**: Prepared according to general procedure using imine **1a** (67.7 mg, 0.33 mmol), MAC **2** (58.9 mg, 0.3 mmol), and catalyst **III** (3.66 mg, 0.0075 mmol) in toluene (4.5 mL) at 23 °C for 16 h. Purified by flash column chromatography (SiO<sub>2</sub>, 10% Et<sub>2</sub>O/Hexanes) to afford 115 mg (96%) of **3a** as an amorphous solid.

*Preparative Scale*: Modified general procedure using imine **1a** (564 mg, 2.75 mmol), MAC **2** (491 mg, 2.5 mmol), and catalyst **III** (12.2 mg, 0.025 mmol, 1 mol%) in toluene (37.5 mL) at 23 °C for 36 h. Purified by flash column chromatography (SiO<sub>2</sub>, 10% Et<sub>2</sub>O/Hexanes) to afford 0.984 g (98%) of **3a** as an amorphous solid.

**IR** (film): 3371, 2958, 2933, 2861, 2243, 1707, 1521, 1367, 1259, 1153, 843, 787, 703

**<sup>1</sup>H NMR** (500 MHz, CDCl<sub>3</sub>) δ 7.40 (s, 5H), 5.49 (s, 1H), 5.39 (s, 1H), 1.46 (s, 9H), 0.85 (s, 9H), 0.27 (s, 3H), 0.21 (s, 3H).

**<sup>13</sup>C NMR** (126 MHz, CDCl<sub>3</sub>) δ 154.53, 133.16, 129.83, 128.81, 128.63, 114.35, 114.20, 81.52, 68.21, 61.60, 28.37, 25.31, 18.20, -4.54, -4.68.

**HRMS** (+ ESI) Mass calcd. for C<sub>21</sub>H<sub>31</sub>N<sub>3</sub>O<sub>3</sub>Si [M+H]<sup>+</sup>: 402.2207, Found [M+H]<sup>+</sup>: 402.2194.

[α]<sup>23.6</sup><sub>D</sub> = + 7.0° (c = 1.0, CHCl<sub>3</sub>)

Enantiomeric ratio: 96:4, Rt<sub>1</sub> = 5.1 min, Rt<sub>2</sub> = 6.4 min, Chiralcel OD-H, 1% IPA/Hexanes, 1 mL/min.

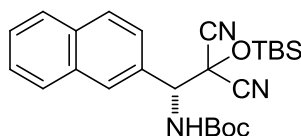

(*R*)-*tert*-butyl (2-((*tert*-butyldimethylsilyl)oxy)-2,2-dicyano-1-(naphthalen-2-yl)ethyl)carbamate

**(3b)**: Prepared according to general procedure using imine **1b** (84.3 mg, 0.33 mmol), MAC **2** (58.9 mg, 0.3 mmol), and catalyst **III** (3.66 mg, 0.0075 mmol) in toluene (4.5 mL) at 23 °C for 16 h. Purified by flash column chromatography (SiO<sub>2</sub>, 5% EtOAc/Hexanes) to afford 126 mg (93%) of **3b** as an amorphous solid.

**IR** (film): 3367, 2931, 2850, 2243, 1706, 1506, 1368, 1150, 843, 786

**<sup>1</sup>H NMR** (500 MHz, CDCl<sub>3</sub>) δ 7.90 – 7.79 (m, 4H), 7.56 – 7.43 (m, 3H), 5.62 (s, 1H), 5.57 (s, 1H), 1.47 (s, 9H), 0.85 (s, 9H), 0.26 (s, 3H), 0.19 (s, 3H).

**<sup>13</sup>C NMR** (126 MHz, CDCl<sub>3</sub>) δ 154.60, 133.79, 132.96, 130.60, 128.65, 128.60, 128.39, 127.88, 127.20, 126.93, 125.44, 114.38, 114.27, 81.60, 68.23, 61.87, 28.39, 25.32, 18.21, -4.52, -4.63.

**HRMS** (+ ESI) Mass calcd. for C<sub>25</sub>H<sub>34</sub>N<sub>3</sub>O<sub>3</sub>Si [M+H]<sup>+</sup>: 452.2364, Found [M+H]<sup>+</sup>: 452.2354.

[α]<sup>23.6</sup><sub>D</sub> = -16.0° (c = 1.0, CHCl<sub>3</sub>)

Enantiomeric ratio: 95.5:4.5, Rt<sub>1</sub> = 5.7 min, Rt<sub>2</sub> = 11.9 min, Chiralcel OD-H, 1% IPA/Hexanes, 1 mL/min

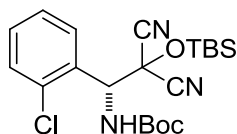

(*R*)-*tert*-butyl (2-((*tert*-butyldimethylsilyloxy)-1-(2-chlorophenyl)-2,2-dicyanoethyl)carbamate

**[3c]**: Prepared according to modified general procedure using imine **1c** (79.0 mg, 0.33 mmol), MAC **2** (58.9 mg, 0.3 mmol), and catalyst **III** (7.33 mg, 0.015 mmol, 5 mol %) in toluene (4.5 mL) at 23 °C for 72 h. Purified by flash column chromatography (SiO<sub>2</sub>, 10% Et<sub>2</sub>O/Hexanes) to afford 124 mg (95%) of **3c** as a viscous oil.

**IR** (film): 3282, 2932, 2861, 2243, 1708, 1473, 1376, 1259, 1156, 843, 787, 754

**<sup>1</sup>H NMR** (500 MHz, CDCl<sub>3</sub>) δ 7.56 – 7.40 (m, 2H), 7.37 – 7.30 (m, 2H), 6.15 (s, 1H), 5.46 (s, 1H), 1.46 (s, 9H), 0.84 (s, 9H), 0.29 (s, 3H), 0.29 (s, 3H).

**<sup>13</sup>C NMR** (126 MHz, CDCl<sub>3</sub>) δ 154.30, 135.34, 132.10, 130.79, 130.35, 128.37, 127.35, 114.12 (x2), 81.69, 67.63, 56.93, 28.34, 25.29, 18.20, -4.45, -4.62.

**HRMS** (+ ESI) Mass calcd. for C<sub>21</sub>H<sub>31</sub>ClN<sub>3</sub>O<sub>3</sub>Si [M+H]<sup>+</sup> : 436.1818, Found [M+H]<sup>+</sup> : 436.1801.

**[α]<sup>23.6</sup><sub>D</sub>** = - 4.0° (c = 0.5, CHCl<sub>3</sub>)

Enantiomeric ratio: 92.5:7.5, Rt<sub>1</sub> = 8.7 min, Rt<sub>2</sub> = 11.7 min, Chiralcel AD-H, 2% IPA/Hexanes, 1 mL/min

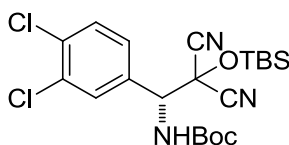

(*R*)-*tert*-butyl (2-((*tert*-butyldimethylsilyloxy)-2,2-dicyano-1-(3,4-dichlorophenyl)ethyl)carbamate

**[3d]**: Prepared according to general procedure using imine **1d** (90.5 mg, 0.33 mmol), MAC **2** (58.9 mg, 0.3 mmol), and catalyst **III** (3.66 mg, 0.0075 mmol) in toluene (4.5 mL) at 23 °C for 14 h. Purified by flash column chromatography (SiO<sub>2</sub>, 33% Dichloromethane/Hexanes to 66% Dichloromethane/Hexanes) to afford 137 mg (97%) of **3d** as an amorphous solid.

**IR** (film): 3362, 2957, 2932, 2861, 2244, 1707, 1473, 1368, 1259, 1146, 842, 787

**<sup>1</sup>H NMR** (500 MHz, CDCl<sub>3</sub>) δ 7.50 (d, *J* = 8.3 Hz, 2H), 7.28 – 7.24 (m, 1H), 5.40 (s, 1H), 5.36 (s, 1H) 1.47 (s, 9H), 0.88 (s, 9H), 0.30 (s, 3H), 0.26 (s, 3H).

**<sup>13</sup>C NMR** (126 MHz, CDCl<sub>3</sub>) δ 154.29, 134.31, 133.53, 133.18, 130.90, 130.81, 127.77, 113.94, 113.82, 82.14, 67.66, 60.75, 28.38, 25.35, 18.26, -4.50, -4.57.

**HRMS** (+ ESI) Mass calcd. for C<sub>21</sub>H<sub>30</sub>Cl<sub>2</sub>N<sub>3</sub>O<sub>3</sub>Si [M+H]<sup>+</sup> : 470.1428, Found [M+H]<sup>+</sup> : 470.1403

**[α]<sup>23.6</sup><sub>D</sub>** = - 1.7° (c = 1.0, CHCl<sub>3</sub>)

Enantiomeric ratio: 94:6, Rt<sub>1</sub> = 5.0 min, Rt<sub>2</sub> = 7.0 min, Chiralcel OD-H, 1% IPA/Hexanes, 1 mL/min

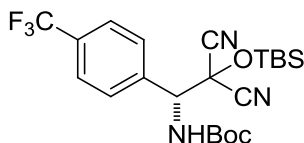

(*R*)-*tert*-butyl (2-((*tert*-butyldimethylsilyl)oxy)-2,2-dicyano-1-(4-(trifluoromethyl)phenyl)ethyl)carbamate

**(3e)**: Prepared according to general procedure using imine **1e** (90.3 mg, 0.33 mmol), MAC **2** (58.9 mg, 0.3 mmol), and catalyst **III** (3.66 mg, 0.0075 mmol) in toluene (4.5 mL) at 23 °C for 14 h. Purified by flash column chromatography (SiO<sub>2</sub>, 10% Et<sub>2</sub>O/Hexanes) to afford 138 mg (98%) of **3e** as an amorphous solid.

**IR** (film): 3363, 2934, 2863, 2244, 1708, 1513, 1368, 1327, 1260, 1168, 1134, 1070, 840, 787

**<sup>1</sup>H NMR** (500 MHz, CDCl<sub>3</sub>) δ 7.68 (d, *J* = 8.2 Hz, 2H), 7.56 (d, *J* = 8.0 Hz, 2H), 5.57 (s, 1H), 5.49 (s, 1H), 1.47 (s, 9H), 0.85 (s, *J* = 48.3 Hz, 9H), 0.29 (s, 3H), 0.23 (s, 3H).

**<sup>13</sup>C NMR** (126 MHz, CDCl<sub>3</sub>) δ 154.41, 137.23, 132.04 (q, *J* = 33.2 Hz), 129.25, 125.73, 123.87 (q, *J* = 272.4 Hz), 114.05, 113.92, 81.94, 67.84, 61.24, 28.33, 25.27, 18.20, -4.55, -4.67.

**HRMS** (+ ESI) Mass calcd. for C<sub>22</sub>H<sub>31</sub>F<sub>3</sub>N<sub>3</sub>O<sub>3</sub>Si [M+H]<sup>+</sup> : 470.2081, Found [M+H]<sup>+</sup> : 470.2058.

[α]<sup>23.6</sup><sub>D</sub> = + 5.3° (c = 1.0, CHCl<sub>3</sub>)

Enantiomeric ratio: 94:6, Rt<sub>1</sub> = 4.5, Rt<sub>2</sub> = 5.5, Chiralcel OD-H, 1% IPA/Hexanes, 1 mL/min

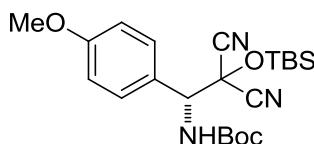

(*R*)-*tert*-butyl (2-((*tert*-butyldimethylsilyl)oxy)-2,2-dicyano-1-(4-methoxyphenyl)ethyl)carbamate

**(3f)**: Prepared according to general procedure using imine **1f** (77.6 mg, 0.33 mmol), MAC **2** (58.9 mg, 0.3 mmol), and catalyst **III** (3.66 mg, 0.0075 mmol) in toluene (4.5 mL) at 23 °C for 24 h. Purified by flash column chromatography (SiO<sub>2</sub>, 10% Et<sub>2</sub>O/Hexanes) to afford 124 mg (96%) of **3f** as an amorphous solid.

**IR** (film): 3371, 2933, 2861, 2243, 1707, 1512, 1367, 1256, 1154, 1032, 835, 787

**<sup>1</sup>H NMR** (500 MHz, CDCl<sub>3</sub>) δ 7.35 – 7.29 (m, 2H), 6.96 – 6.87 (m, 2H), 5.49 (s, 1H), 5.33 (s, 1H), 3.81 (s, 3H), 1.45 (s, 9H), 0.87 (s, 9H), 0.28 (s, 3H), 0.23 (s, 3H).

**<sup>13</sup>C NMR** (126 MHz, CDCl<sub>3</sub>) δ 160.70, 154.48, 129.82, 125.29, 114.41, 114.30, 114.17, 81.36, 68.33, 61.26, 55.47, 28.36, 25.33, 18.19, -4.54, -4.64.

**HRMS** (+ ESI) Mass calcd. for C<sub>22</sub>H<sub>34</sub>N<sub>3</sub>O<sub>4</sub>Si [M+Na]<sup>+</sup> : 454.2133, Found [M+Na]<sup>+</sup> : 454.2120.

[α]<sup>23.6</sup><sub>D</sub> = - 4.2° (c = 1.0, CHCl<sub>3</sub>)

Enantiomeric ratio: 95:5, Rt<sub>1</sub> = 5.8, Rt<sub>2</sub> = 7.8, Chiralcel OD-H, 1% IPA/Hexanes, 1 mL/min

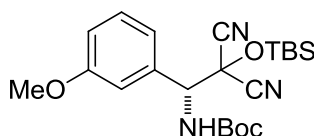

(*R*)-*tert*-butyl (2-((*tert*-butyldimethylsilyl)oxy)-2,2-dicyano-1-(3-methoxyphenyl)ethyl)carbamate

**(3g)**: Prepared according to general procedure using imine **1g** (77.6 mg, 0.33 mmol), MAC **2** (58.9 mg, 0.3

mmol), and catalyst **III** (3.66 mg, 0.0075 mmol) in toluene (4.5 mL) at 23 °C for 14 h. Purified by flash column chromatography (SiO<sub>2</sub>, 75% Dichloromethane/Hexanes, then 10% EtOAc/Hexanes) to afford 125 mg (97%) of **3g** as an amorphous solid.

**IR** (film): 3365, 2933, 2861, 2243, 1707, 1603, 1494, 1367, 1258, 1153, 1044. 844, 786

**<sup>1</sup>H NMR** (500 MHz, CDCl<sub>3</sub>) δ 7.31 (dd, *J* = 8.4, 7.7 Hz, 1H), 6.99 (d, *J* = 7.7 Hz, 1H), 6.96 – 6.91 (m, 2H), 5.49 (d, *J* = 7.9 Hz, 1H), 5.34 (d, *J* = 7.8 Hz, 1H), 3.81 (s, 3H), 1.46 (s, 9H), 0.86 (s, 9H), 0.28 (s, 3H), 0.23 (s, 3H).

**<sup>13</sup>C NMR** (126 MHz, CDCl<sub>3</sub>) δ 159.86, 154.52, 134.69, 129.89, 120.69, 115.33, 114.55, 114.38, 114.27, 81.53, 68.16, 61.71, 55.51, 28.38, 25.32, 18.20, -4.52, -4.65.

**HRMS** (+ ESI) Mass calcd. for C<sub>22</sub>H<sub>34</sub>N<sub>3</sub>O<sub>4</sub>Si [M+Na]<sup>+</sup>: 454.2133, Found [M+Na]<sup>+</sup>: 454.2123.

[α]<sub>D</sub><sup>23.6</sup> = + 1.4° (c = 1.0, CHCl<sub>3</sub>)

Enantiomeric ratio: 97:3, Rt<sub>1</sub> = 5.6, Rt<sub>2</sub> = 7.0, Chiralcel OD-H, 1% IPA/Hexanes, 1 mL/min

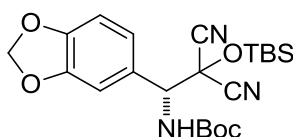

(*R*)-*tert*-butyl (1-(benzo[*d*][1,3]dioxol-5-yl)-2-((*tert*-butyldimethylsilyl)oxy)-2,2-dicyanoethyl)carbamate

**(3h)**: Prepared according to general procedure using imine **1h** (82.3 mg, 0.33 mmol), MAC **2** (58.9 mg, 0.3 mmol), and catalyst **III** (3.66 mg, 0.0075 mmol) in toluene (4.5 mL) at 23 °C for 16 h. Purified by flash column chromatography (SiO<sub>2</sub>, 10% Et<sub>2</sub>O, 30% CHCl<sub>3</sub>, 60% Hexanes) to afford 128 mg (96%) of **3h** as an amorphous solid.

**IR** (film): 3376, 2957, 2932, 2861, 2243, 1706, 1505, 1490, 1368, 1242, 1155, 1041, 844, 787

**<sup>1</sup>H NMR** (500 MHz, CDCl<sub>3</sub>) δ 6.91 – 6.85 (m, 2H), 6.81 (d, *J* = 8.4 Hz, 1H), 5.98 (s, 2H), 5.44 (s, 1H), 5.29 (s, 1H), 1.46 (s, 9H), 0.88 (s, 9H), 0.30 (s, 3H), 0.26 (s, 3H).

**<sup>13</sup>C NMR** (126 MHz, CDCl<sub>3</sub>) δ 154.42, 148.79, 148.07, 126.96, 122.64, 114.30, 114.19, 108.73, 108.44, 101.66, 81.45, 68.18, 61.53, 28.34, 25.33, 18.20, -4.52, -4.62.

**HRMS** (+ ESI) Mass calcd. for C<sub>22</sub>H<sub>31</sub>N<sub>3</sub>O<sub>5</sub>Si [M+Na]<sup>+</sup>: 468.1925, Found [M+Na]<sup>+</sup>: 468.1918.

[α]<sub>D</sub><sup>23.6</sup> = - 2.8° (c = 1.0, CHCl<sub>3</sub>)

Enantiomeric ratio: 96:4, Rt<sub>1</sub> = 6.7, Rt<sub>2</sub> = 9.3, Chiralcel OD-H, 1% IPA/Hexanes, 1 mL/min

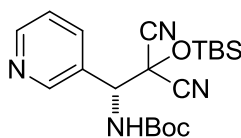

(*R*)-*tert*-butyl (2-((*tert*-butyldimethylsilyl)oxy)-2,2-dicyano-1-(pyridin-3-yl)ethyl)carbamate

**(3i)**: Prepared according to general procedure using imine **1i** (68.1 mg, 0.33 mmol), MAC **2** (58.9 mg, 0.3 mmol), and catalyst **III** (3.66 mg, 0.0075 mmol) in toluene (4.5 mL) at 23 °C for 14 h. Purified by flash column chromatography (SiO<sub>2</sub>, 30% EtOAc/Hexanes) to afford 118 mg (98%) of **3i** as an amorphous solid.

**IR** (film): 3310, 2957, 2933, 2861, 2243, 1721, 1522, 1368, 1257, 1154, 1048, 843, 787



**<sup>1</sup>H NMR** (500 MHz, CDCl<sub>3</sub>) δ 8.68 (s, 2H), 7.79 (d, *J* = 6.4 Hz, 1H), 7.37 (dd, *J* = 7.8, 4.9 Hz, 1H), 5.85 (s, 1H), 5.49 (s, 1H), 1.47 (s, 9H), 0.85 (s, 9H), 0.29 (s, 3H), 0.23 (s, 3H).

**<sup>13</sup>C NMR** (126 MHz, CDCl<sub>3</sub>) δ 154.47, 150.94, 150.14, 135.81, 129.30, 123.54, 114.02, 113.85, 81.95, 67.81, 59.79, 28.31, 25.27, 18.17, -4.53, -4.66.

**HRMS** (+ ESI) Mass calcd. for C<sub>20</sub>H<sub>31</sub>N<sub>4</sub>O<sub>3</sub>Si [M+H]<sup>+</sup> : 403.2160, Found [M+H]<sup>+</sup> : 403.2151.

[α]<sup>23.6</sup><sub>D</sub> = + 3.1° (c = 1.0, CHCl<sub>3</sub>)

Enantiomeric ratio: 93:7, Rt<sub>1</sub> = 6.3, Rt<sub>2</sub> = 8.0, Chiralcel AD-H, 8% IPA/Hexanes, 1 mL/min

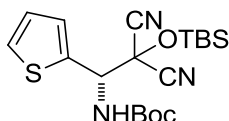

(*S*)-*tert*-butyl (2-((*tert*-butyldimethylsilyl)oxy)-2,2-dicyano-1-(thiophen-2-yl)ethyl)carbamate

**(3j)**: Prepared according to general procedure using imine **1j** (69.7 mg, 0.33 mmol), MAC **2** (58.9 mg, 0.3 mmol), and catalyst **III** (3.66 mg, 0.0075 mmol) in toluene (4.5 mL) at 23 °C for 12 h. Purified by flash column chromatography (SiO<sub>2</sub>, 10% Et<sub>2</sub>O/Hexanes) to afford 121 mg (99%) of **3j** as an amorphous solid.

**IR** (film): 3357, 2933, 2861, 2243, 1710, 1506, 1368, 1258, 1156, 842, 787

**<sup>1</sup>H NMR** (500 MHz, CDCl<sub>3</sub>) δ 7.35 (dd, *J* = 5.1, 0.9 Hz, 1H), 7.22 (d, *J* = 3.5 Hz, 1H), 7.04 (dd, *J* = 5.0, 3.7 Hz, 1H), 5.68 (d, *J* = 8.9 Hz, 1H), 5.42 (s, 1H), 1.47 (s, 9H), 0.92 (s, 9H), 0.33 (s, 3H), 0.30 (s, 3H).

**<sup>13</sup>C NMR** (126 MHz, CDCl<sub>3</sub>) δ 154.28, 135.24, 128.17, 127.11, 127.05, 114.05, 113.98, 81.63, 68.13, 58.08, 28.30, 25.32, 18.19, -4.53, -4.64.

**HRMS** (+ ESI) Mass calcd. for C<sub>19</sub>H<sub>29</sub>N<sub>3</sub>O<sub>3</sub>SSi [M+Na]<sup>+</sup> : 430.1591, Found [M+Na]<sup>+</sup> : 430.158.

[α]<sup>23.6</sup><sub>D</sub> = + 0.5° (c = 1.0, CHCl<sub>3</sub>)

Enantiomeric ratio: 97.5:2.5, Rt<sub>1</sub> = 5.0, Rt<sub>2</sub> = 5.7, Chiralcel AD-H, 8% IPA/Hexanes, 1 mL/min

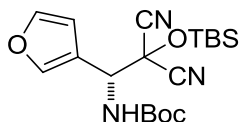

(*R*)-*tert*-butyl (2-((*tert*-butyldimethylsilyl)oxy)-2,2-dicyano-1-(furan-3-yl)ethyl)carbamate

**(3k)**: Prepared according to general procedure using imine **1k** (64.4 mg, 0.33 mmol), MAC **2** (58.9 mg, 0.3 mmol), and catalyst **III** (3.66 mg, 0.0075 mmol) in toluene (4.5 mL) at 23 °C for 36 h. Purified by flash column chromatography (SiO<sub>2</sub>, 10% Et<sub>2</sub>O/Hexanes) to afford 113 mg (96%) of **3k** as an amorphous solid.

**IR** (film): 3364, 2933, 2861, 2244, 1708, 1506, 1358, 1259, 1156, 1023, 844, 787

**<sup>1</sup>H NMR** (500 MHz, CDCl<sub>3</sub>) δ 7.57 (s, 1H), 7.45 (t, *J* = 1.5 Hz, 1H), 6.52 (d, *J* = 0.7 Hz, 1H), 5.38 (s, 1H), 5.26 (s, 1H), 1.47 (s, 9H), 0.90 (s, 9H), 0.33 (s, 3H), 0.31 (s, 2H).

**<sup>13</sup>C NMR** (126 MHz, CDCl<sub>3</sub>) δ 154.47, 143.97, 141.89, 118.82, 114.36, 114.31, 109.39, 81.60, 68.14, 55.22, 28.38, 25.33, 18.21, -4.49, -4.58.

**HRMS** (+ ESI) Mass calcd. for C<sub>19</sub>H<sub>29</sub>N<sub>3</sub>O<sub>4</sub>Si [M+Na]<sup>+</sup> : 414.1820, Found [M+Na]<sup>+</sup> : 414.1809

$[\alpha]^{23.6}_D = 7.3^\circ$  ( $c = 1.0$ ,  $\text{CHCl}_3$ )

Enantiomeric ratio: 93.5:6.5,  $R_{t1} = 5.0$ ,  $R_{t2} = 5.7$ , Chiralcel OD-H, 1% IPA/Hexanes, 1 mL/min

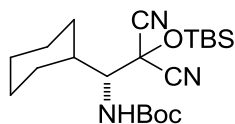

(*R*)-*tert*-butyl (2-((*tert*-butyldimethylsilyloxy)-2,2-dicyano-1-cyclohexylethyl)carbamate

**(31)**: Prepared according to modified general procedure using imine **11** (69.7 mg, 0.33 mmol), MAC **2** (58.9 mg, 0.3 mmol), and catalyst **III** (7.33 mg, 0.015 mmol) in toluene (3 mL) at 23 °C for 72 h. Purified by flash column chromatography ( $\text{SiO}_2$ , 10%  $\text{Et}_2\text{O}$ /Hexanes) to afford 110 mg (90%) of **31** as a clear viscous oil.

**IR** (film): 3363, 2931, 2858, 2242, 1709, 1506, 1367, 1259, 1153, 1007, 843, 786

**$^1\text{H NMR}$**  (500 MHz,  $\text{CDCl}_3$ )  $\delta$  4.85 (d,  $J = 10.9$  Hz, 1H), 4.17 (dd,  $J = 10.9, 3.9$  Hz, 1H), 1.97 – 1.62 (m, 6H), 1.47 (s, 9H), 1.35 – 1.00 (m, 5H), 0.94 (s, 9H), 0.38 (s, 3H), 0.37 (s, 2H).

**$^{13}\text{C NMR}$**  (126 MHz,  $\text{CDCl}_3$ )  $\delta$  155.19, 114.80, 114.70, 80.87, 66.96, 61.92, 38.70, 31.41, 28.36, 27.49, 26.19, 25.89, 25.88, 25.33, 18.20, -4.47, -4.57.

**HRMS** (+ ESI) Mass calcd. for  $\text{C}_{21}\text{H}_{37}\text{N}_3\text{O}_3\text{Si}$   $[\text{M}+\text{H}]^+$  : 430.2491, Found  $[\text{M}+\text{H}]^+$  : 430.2496

$[\alpha]^{23.6}_D = 29.6^\circ$  ( $c = 1.0$ ,  $\text{CHCl}_3$ )

Enantiomeric ratio: 92:8 (derived from benzyl amide (**8**),)

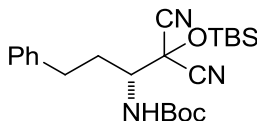

(*R*)-*tert*-butyl (1-((*tert*-butyldimethylsilyloxy)-1,1-dicyano-4-phenylbutan-2-yl)carbamate

**(3m)**: To a 1 dram (4 mL) vial equipped with a magnetic stir bar was added imine **1m** (84.0 mg 0.33 mmol). A solution of MAC **2** (58.9 mg, 0.3 mmol) in 0.6 mL of  $\text{CHCl}_3$  was added. The sealed vial was submerged in a  $-40$  °C bath and stirred for 10 minutes before catalyst **III** (7.33 mg, 0.015 mmol, 5 mol %) was added as a solid. The vial was re-sealed, stirred for 30 h, warmed to 23 °C, concentrated, and purified by flash column chromatography ( $\text{SiO}_2$ , 5% to 10%  $\text{EtOAc}$ /Hexanes) to afford 116 mg (90%) of **3m** as a clear viscous oil.

**IR** (film): 3374, 2932, 2861, 2243, 1709, 1497, 1367, 1259, 1141, 1048, 843, 787

**$^1\text{H NMR}$**  (500 MHz,  $\text{CDCl}_3$ )  $\delta$  7.30 (t,  $J = 7.4$  Hz, 2H), 7.21 (t,  $J = 7.4$  Hz, 1H), 7.17 (d,  $J = 7.2$  Hz, 2H), 4.72 (d,  $J = 10.4$  Hz, 1H), 4.27 (td,  $J = 11.4, 2.1$  Hz, 1H), 2.81 (dd,  $J = 8.6, 5.3$  Hz, 1H), 2.67 (dd,  $J = 14.0, 8.0$  Hz, 1H), 2.26 – 2.11 (m, 1H), 1.87 – 1.71 (m, 1H), 1.48 (s, 9H), 0.90 (s, 9H), 0.35 (s, 3H), 0.33 (s, 3).

**$^{13}\text{C NMR}$**  (126 MHz,  $\text{CDCl}_3$ )  $\delta$  154.96, 140.12, 128.85, 128.58, 126.66, 114.35, 114.28, 81.15, 67.94, 58.01, 31.90, 31.33, 28.42, 25.37, 18.22, -4.47, -4.51.

**HRMS** (+ ESI) Mass calcd. for  $\text{C}_{23}\text{H}_{35}\text{N}_3\text{O}_3\text{Si}$   $[\text{M}+\text{Na}]^+$  : 452.2340, Found  $[\text{M}+\text{Na}]^+$  : 452.2331

$[\alpha]^{23.6}_D = +39.4^\circ$  ( $c = 1.0$ ,  $\text{CHCl}_3$ )

Enantiomeric ratio: 92:8,  $R_{t1} = 12.2$ ,  $R_{t2} = 15.9$ , Chiralcel AD-H, 1% IPA/Hexanes, 1 mL/min

## Experimental protocols for the unmasking 3a

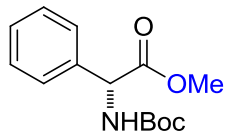

(*R*)-methyl 2-((*tert*-butoxycarbonyl)amino)-2-phenylacetate

**(4a)**: To a 2 dram (8 mL) vial was added adduct **3a** (68 mg, 0.17 mmol), 1.10 mL MeOH, and 0.57 mL THF. The vial was sealed with a Septa-cap, and cooled to  $-45\text{ }^{\circ}\text{C}$  for 15 minutes before TBAF (1.0 M in THF) (0.19 mL, 0.19 mmol) was added dropwise over 5 minutes. The reaction was allowed to stir for 2 hours at  $-45\text{ }^{\circ}\text{C}$  before being quenched with aq.  $\text{NH}_4\text{Cl}$  (3 mL), and  $\text{H}_2\text{O}$  (3 mL). The reaction was warmed to ambient temperature, and extracted with EtOAc (10 mL, 3x) The combined organic solvents were dried over  $\text{Na}_2\text{SO}_4$ , concentrated, and purified by flash column chromatography ( $\text{SiO}_2$ , 10% to 15% EtOAc/Hexanes) to afford 42 mg (93%) of **4a** as a white solid.

**IR** (film): 3374, 2977, 1746, 1715, 1497, 1436, 1165, 1053

**$^1\text{H NMR}$**  (500 MHz,  $\text{CDCl}_3$ )  $\delta$  7.41 – 7.29 (m, 5H), 5.56 (d,  $J = 5.6$  Hz, 1H), 5.32 (d,  $J = 7.4$  Hz, 1H), 3.71 (s, 3H), 1.43 (s, 9H).

**$^{13}\text{C NMR}$**  (126 MHz,  $\text{CDCl}_3$ )  $\delta$  171.85, 155.02, 137.14, 129.09, 128.63, 127.34, 80.35, 57.82, 52.85, 28.50.

**HRMS** (+ ESI) Mass calcd. for  $\text{C}_{14}\text{H}_{19}\text{NO}_4$   $[\text{M}+\text{H}]^+$  : 266.1387, Found  $[\text{M}+\text{H}]^+$  : 266.1350

**$[\alpha]^{23.6}_{\text{D}}$**  =  $-119.4^{\circ}$  ( $c = 1.0$ ,  $\text{CHCl}_3$ ) Lit:  **$[\alpha]^{20}_{\text{D}}$** :  $-130$  ( $c = 1.0$ ,  $\text{CHCl}_3$ )<sup>5</sup>

Enantiomeric ratio: 96:4,  $\text{Rt}_1 = 5.9$ ,  $\text{Rt}_2 = 6.8$ , Chiralcel OD-H, 4% IPA/Hexanes, 1 mL/min.

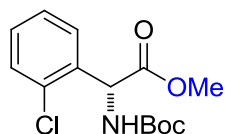

(*R*)-methyl 2-((*tert*-butoxycarbonyl)amino)-2-(2-chlorophenyl)acetate

**(4c)**: To a 2 dram (8 mL) vial was added adduct **3c** (84 mg, 0.193 mmol), 1.33 mL MeOH, and 0.67 mL THF. The vial was sealed with a Septa-cap, and cooled to  $-45\text{ }^{\circ}\text{C}$  for 15 minutes before TBAF (1.0 M in THF) (0.21 mL, 0.21 mmol) was added dropwise over 5 minutes. The reaction was allowed to stir for 2 hours at  $-45\text{ }^{\circ}\text{C}$  before being quenched with aq.  $\text{NH}_4\text{Cl}$  (3 mL). The reaction was warmed to ambient temperature, diluted with EtOAc (10 mL),  $\text{H}_2\text{O}$  (5 mL), and brine (2 mL). The organic layer was separated and the aqueous layer was extracted with EtOAc (10 mL, 2x). The combined organic solvents were dried over  $\text{Na}_2\text{SO}_4$ , concentrated, and purified by flash column chromatography ( $\text{SiO}_2$ , 10% EtOAc/Hexanes) to afford 55 mg (95%) of **4c** as a white solid.

**IR** (film): 3373, 2977, 1748, 1715, 1494, 1162, 1054, 755

**$^1\text{H NMR}$**  (500 MHz,  $\text{CDCl}_3$ )  $\delta$  7.42 – 7.31 (m, 2H), 7.27 – 7.20 (m, 2H), 5.72 (br m, 2H), 3.71 (s, 3H), 1.42 (s, 9H).

(5) Yuste, F.; Ortiz, B.; Carrasco, A.; Peralta, M.; Quintero, L.; Sanchez-Obregon, R.; Walls, F.; Ruano, J. L. G. *Tetrahedron: Asymmetry*. **2000**, *11*, 3079.

<sup>13</sup>C NMR (126 MHz, CDCl<sub>3</sub>) δ 171.15, 154.94, 135.37, 133.70, 130.17, 129.88, 129.67, 127.33, 80.27, 55.70, 52.91, 28.36.

HRMS (+ ESI) Mass calcd. for C<sub>14</sub>H<sub>18</sub>ClNO<sub>4</sub> [M+Na]<sup>+</sup>: 322.0817, Found [M+Na]<sup>+</sup>: 322.0813

[α]<sup>23.6</sup><sub>D</sub> = -100.5° (c = 1.0, CHCl<sub>3</sub>) Lit [α]<sup>25</sup><sub>D</sub>: 119.3 (c = 1.0, CHCl<sub>3</sub>)<sup>6</sup>

Enantiomeric ratio: 92.5:7.5, Rt<sub>1</sub> = 7.7, Rt<sub>2</sub> = 9.2, Chiralcel OD-H, 3% IPA/Hexanes, 1 mL/min

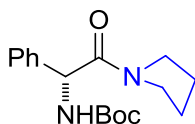

(*R*)-*tert*-butyl (2-oxo-1-phenyl-2-(pyrrolidin-1-yl)ethyl)carbamate

(**5**): To a 1 dram (4 mL) vial was added adduct **3a** (71 mg, 0.177 mmol), pyrrolidine (37.8 mg, 0.531 mmol), and 0.54 mL Dichloromethane. The vial was sealed with a Septa-cap, and cooled to -78 °C in a CO<sub>2</sub>/Acetone bath for 15 minutes before TASF (58.5 mg, 0.21 mmol) in DCM (0.12 mL) (1.8 M) was added dropwise over 5 minutes. The reaction was allowed to stir for 1.5 hours at -78 °C before being quenched with aq. HCl (1.0M, 3 mL). The reaction was warmed to ambient temperature, diluted with EtOAc (10 mL), H<sub>2</sub>O (5 mL), and brine (2 mL). The organic layer was separated and the aqueous layer was extracted with EtOAc (10 mL, 2x). The combined organic solvents were dried over Na<sub>2</sub>SO<sub>4</sub>, concentrated, and purified by flash column chromatography (SiO<sub>2</sub>, 50% EtOAc/Hexanes) to afford 52 mg (96%) of **5** as a white solid.

IR (film): 3411, 3324, 2974, 2877, 1711, 1645, 1435, 1166, 1053, 700

<sup>1</sup>H NMR (500 MHz, CDCl<sub>3</sub>) δ 7.47 – 7.28 (m, 5H), 6.05 (d, *J* = 7.4 Hz, 1H), 5.37 (d, *J* = 7.7 Hz, 1H), 3.62 – 3.50 (m, 2H), 3.46 – 3.34 (m, 1H), 3.14 – 3.00 (m, 1H), 1.96 – 1.63 (m, 4H), 1.41 (s, 9H).

<sup>13</sup>C NMR (126 MHz, CDCl<sub>3</sub>) δ 168.59, 155.23, 138.04, 129.06, 128.26, 128.10, 79.75, 56.73, 46.38, 46.28, 28.54, 26.07, 24.14.

HRMS (+ ESI) Mass calcd. for C<sub>17</sub>H<sub>24</sub>N<sub>2</sub>O<sub>3</sub> [M+Na]<sup>+</sup>: 327.1679, Found [M+Na]<sup>+</sup>: 327.1674.

[α]<sup>23.6</sup><sub>D</sub> = -129.8° (c = 1.0, CHCl<sub>3</sub>)

Enantiomeric ratio: 96:4, Rt<sub>1</sub> = 8.0, Rt<sub>2</sub> = 9.4, Chiralcel OD-H, 6% IPA/Hexanes, 1 mL/min

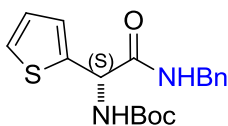

(*S*)-*tert*-butyl (2-(benzylamino)-2-oxo-1-(thiophen-2-yl)ethyl)carbamate

(**6**): To a 1 dram (4 mL) vial was added adduct **3j** (82 mg, 0.20 mmol), benzylamine (64.3 mg, 0.60 mmol) and 0.60 mL Dichloromethane. The vial was sealed with a Septa-cap, and cooled to -78 °C in a CO<sub>2</sub>/Acetone bath for 15 minutes before TASF (66.1 mg, 0.24 mmol) in DCM (0.13 mL) (1.8 M) was added dropwise over 5 minutes. The reaction was allowed to stir for 2 hours at -78 °C before being quenched with aq. HCl (1.0M, 3 mL). The reaction was warmed to ambient temperature, diluted with EtOAc (10 mL), H<sub>2</sub>O (5 mL), and brine (2 mL). The organic layer was separated and the aqueous layer was extracted with EtOAc (10 mL, 2x). The combined organic solvents were dried over Na<sub>2</sub>SO<sub>4</sub>, concentrated, and purified by flash column chromatography (SiO<sub>2</sub>, 30% EtOAc/Hexanes) to afford 65 mg (93%) of **6** as a white solid.

(6) Ferraboschi, P.; De Mieri, M.; Galimberti, F. *Tetrahedron: Asymmetry*. **2010**, *21*, 2136.

**IR** (film): 3308, 2977, 2929, 1693, 1660, 1496, 1367, 1247, 1164, 1064, 697.

**<sup>1</sup>H NMR** (500 MHz, CDCl<sub>3</sub>) δ 7.29 – 7.19 (m, 4H), 7.15 (d, *J* = 6.8 Hz, 2H), 7.01 (d, *J* = 3.4 Hz, 1H), 6.90 (dd, *J* = 5.0, 3.6 Hz, 1H), 6.86 (s, 1H), 5.87 (s, 1H), 5.59 (s, 1H), 4.40 (ddd, *J* = 36.4, 15.0, 5.8 Hz, 2H), 1.37 (s, 9H).

**<sup>13</sup>C NMR** (126 MHz, CDCl<sub>3</sub>) δ 169.65, 155.30, 141.02, 137.86, 128.76, 127.69, 127.59, 127.03, 126.22, 125.83, 80.49, 54.24, 43.80, 28.40.

**HRMS** (+ ESI) Mass calcd. for C<sub>18</sub>H<sub>22</sub>N<sub>2</sub>O<sub>3</sub>S [M+H]<sup>+</sup> : 347.1424, Found [M+H]<sup>+</sup> : 347.1414

**[α]<sup>23.6<sub>D</sub></sup>** = = - 63.8° (c = 1.0, CHCl<sub>3</sub>)

Enantiomeric ratio: 97.5:2.5, Rt<sub>1</sub> = 10.0, Rt<sub>2</sub> = 15.0, Chiralcel OD-H, 5% IPA/Hexanes, 1 mL/min

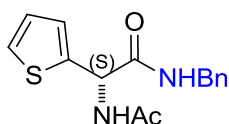

(S)-2-acetamido-N-benzyl-2-(thiophen-2-yl)acetamide

**(7):** To a 1 dram (4 mL) vial was added **6** (35 mg, 0.1 mmol), and 0.50 mL Dichloromethane. The vial was sealed with a Septa-cap, and cooled to 0 °C in an ice bath for 15 minutes before Trifluoroacetic acid (0.5 mL) was added dropwise. The reaction was allowed to stir for 1 hour at 0 °C, before being concentrated in vacuo with stirring at 0 °C. The ice bath was removed and the dry residue was re-dissolved in pyridine (0.5 mL). Acetic Anhydride (102 mg, 1 mmol) was added and the reaction was stirred with 2 h at ambient temperature. The reaction was diluted with 15 mL EtOAc, and washed with aq. NaHCO<sub>3</sub> (5 mL), aq HCl (1.0M, 5 mL), and Brine (5 mL). The organic layer was dried over Na<sub>2</sub>SO<sub>4</sub>, concentrated, and purified by flash column chromatography (SiO<sub>2</sub>, 50% to 100% EtOAc/Hexanes) to afford 27.7 mg (96%) of **7** as a white solid.

**IR** (film): 3283, 3065, 1638, 1539, 1376, 1229, 696.

**<sup>1</sup>H NMR** (500 MHz, CDCl<sub>3</sub>) δ 7.32 (t, *J* = 5.1 Hz, 1H), 7.30 – 7.23 (m, 3H), 7.22 – 7.16 (m, 3H), 7.08 (d, *J* = 7.6 Hz, 1H), 7.03 (d, *J* = 3.4 Hz, 1H), 6.90 (dd, *J* = 5.1, 3.6 Hz, 1H), 6.02 (d, *J* = 7.7 Hz, 1H), 4.39 (ddd, *J* = 20.5, 14.5, 5.5 Hz, 2H), 1.88 (s, 9H).

**<sup>13</sup>C NMR** (126 MHz, CDCl<sub>3</sub>) δ 170.02, 169.53, 140.76, 137.71, 128.84, 127.89, 127.71, 127.07, 126.52, 125.86, 52.65, 44.04, 23.11.

**HRMS** (+ ESI) Mass calcd. for C<sub>15</sub>H<sub>16</sub>N<sub>2</sub>O<sub>2</sub>S [M+H]<sup>+</sup> : 289.1005, Found [M+H]<sup>+</sup> : 289.0997

**[α]<sup>23.6<sub>D</sub></sup>** = = - 90.0° (c = 1.0, CHCl<sub>3</sub>)

Enantiomeric ratio: 97.5:2.5, Rt<sub>1</sub> = 6.4, Rt<sub>2</sub> = 13.5, Chiralcel AD-H, 25% IPA/Hexanes, 1 mL/min

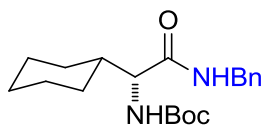

(R)-tert-butyl (2-(benzylamino)-1-cyclohexyl-2-oxoethyl)carbamate

**(8):** To a 2 dram (8 mL) vial was added adduct **3a** (110 mg, 0.27 mmol), benzylamine (86.8 mg, 0.81 mmol) and 0.82 mL Dichloromethane. The vial was sealed with a Septa-cap, and cooled to -78 °C in a CO<sub>2</sub>/Acetone bath for 15 minutes before TASF (89 mg, 0.32 mmol) in DCM (0.18 mL) (1.8 M) was added dropwise over 5

minutes. The reaction was allowed to stir for 1.5 hours at  $-78\text{ }^{\circ}\text{C}$  before being quenched with aq. HCl (1.0M, 5 mL). The reaction was warmed to ambient temperature, diluted with EtOAc (10 mL), H<sub>2</sub>O (5 mL), and brine (2 mL). The organic layer was separated and the aqueous layer was extracted with EtOAc (10 mL, 2x). The combined organic solvents were dried over Na<sub>2</sub>SO<sub>4</sub>, concentrated, and purified by flash column chromatography (SiO<sub>2</sub>, 20% EtOAc/Hexanes) to afford 90 mg (92%) of **8** as a clear viscous oil.

**IR** (film): 3296, 2927, 2852, 1684, 1653, 1522, 1455, 1294, 1245, 1173, 697.

**<sup>1</sup>H NMR** (500 MHz, CDCl<sub>3</sub>)  $\delta$  7.32 – 7.26 (m, 2H), 7.26 – 7.20 (m, 3H), 6.76 (s, 1H), 5.25 (d,  $J$  = 8.6 Hz, 1H), 4.40 (ddd,  $J$  = 36.7, 14.9, 5.6 Hz, 2H), 3.97 (t,  $J$  = 7.4 Hz, 1H), 1.88 – 1.56 (m, 6H), 1.39 (s,  $J$  = 10.0 Hz, 9H), 1.29 – 0.67 (m, 5H).

**<sup>13</sup>C NMR** (126 MHz, CDCl<sub>3</sub>)  $\delta$  171.86, 156.11, 138.31, 128.77, 127.81, 127.54, 79.92, 59.85, 43.54, 40.51, 29.95, 28.66, 28.48, 26.31, 26.11.

**HRMS** (+ ESI) Mass calcd. for C<sub>20</sub>H<sub>30</sub>N<sub>2</sub>O<sub>3</sub> [M+Na]<sup>+</sup> : 369.2149, Found [M+Na]<sup>+</sup> : 369.2143

**$[\alpha]^{23.6}_{\text{D}}$**  = =  $-0.3^{\circ}$  ( $c$  = 1.0, CHCl<sub>3</sub>)

Enantiomeric ratio: 92:8,  $R_{\text{t}1}$  = 6.1,  $R_{\text{t}2}$  = 8.1, Chiralcel AD-H, 10% IPA/Hexanes, 1 mL/min

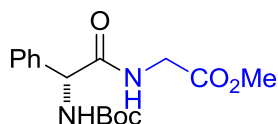

(*R*)-methyl 2-(2-((*tert*-butoxycarbonyl)amino)-2-phenylacetamido)acetate

**(9)**: To a 1 dram (4 mL) vial was added adduct **3a** (70 mg, 0.174 mmol), 0.52 mL Dichloromethane, glycine methyl ester hydrochloride (43.8 mg, 0.348 mmol), diisopropyl ethyl amine (45.1 mg, 0.348 mmol), and stirred at ambient temperature until dissolution. The vial was sealed with a Septa-cap, and cooled to  $-78\text{ }^{\circ}\text{C}$  in a CO<sub>2</sub>/Acetone bath for 15 minutes before TASF (58 mg, 0.21 mmol) in DCM (0.12 mL) (1.8 M) was added dropwise over 5 minutes. The reaction was allowed to stir for 2 hours at  $-78\text{ }^{\circ}\text{C}$  before being quenched with aq. HCl (1.0M, 3 mL). The reaction was warmed to ambient temperature, diluted with EtOAc (10 mL), H<sub>2</sub>O (5 mL), and brine (2 mL). The organic layer was separated and the aqueous layer was extracted with EtOAc (10 mL, 2x). The combined organic solvents were dried over Na<sub>2</sub>SO<sub>4</sub>, concentrated, and purified by flash column chromatography (SiO<sub>2</sub>, 35% EtOAc/Hexanes) to afford 52.0 mg (93%) of **9** as a white solid.

**IR** (film): 3320, 2977, 1751, 1667, 1497, 1367, 1167, 698.

**<sup>1</sup>H NMR** (500 MHz, CDCl<sub>3</sub>)  $\delta$  7.41 – 7.28 (m, 5H), 6.66 (s, 1H), 5.82 (s, 1H), 5.26 (s, 1H), 3.99 (ddd,  $J$  = 22.3, 18.2, 4.8 Hz, 2H), 3.70 (s, 3H), 1.41 (s, 9H).

**<sup>13</sup>C NMR** (126 MHz, CDCl<sub>3</sub>)  $\delta$  170.70, 170.08, 155.30, 138.20, 129.12, 128.54, 127.47, 80.29, 58.59, 52.48, 41.53, 28.45.

**HRMS** (+ ESI) Mass calcd. for C<sub>16</sub>H<sub>22</sub>N<sub>2</sub>O<sub>5</sub> [M+Na]<sup>+</sup> : 345.1421, Found [M+Na]<sup>+</sup> : 345.1415.

**$[\alpha]^{23.6}_{\text{D}}$**  = =  $-81.4^{\circ}$  ( $c$  = 1.0, CHCl<sub>3</sub>)

Enantiomeric ratio: 96:4,  $R_{\text{t}1}$  = 17.6,  $R_{\text{t}2}$  = 24.0, Chiralcel AD-H, 10% IPA/Hexanes, 1 mL/min

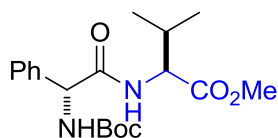

(S)-methyl 2-((R)-2-((tert-butoxycarbonyl)amino)-2-phenylacetamido)-3-methylbutanoate

**(10)**: To a 2 dram (8 mL) vial was added adduct **3a** (82 mg, 0.204 mmol), valine methyl ester <sup>7</sup> (80.4 mg, 0.612 mmol), and Dichloromethane (0.62 mL). The vial was sealed with a Septa-cap, and cooled to  $-45\text{ }^{\circ}\text{C}$  in cryogenic bath for 15 minutes before TASF (67.4 mg, 0.245 mmol) in DCM (0.135 mL) (1.8 M) was added dropwise over 5 minutes. The reaction was allowed to stir for 6 hours at  $-45\text{ }^{\circ}\text{C}$  before being quenched slowly by the dropwise addition of a 1.0 M solution of Trifluoroacetic acid in DCM (2 mL, 2 mmol) over 5 minutes. Aq. HCl (1.0M, 3 mL) was added and the reaction was warmed to ambient temperature, diluted with EtOAc (20 mL), and washed aq. HCl (1.0 M, 10 mL, 2x), sat.  $\text{NaHCO}_3$  (10 mL), and brine (5 mL). <sup>8</sup> The organic layer was separated and dried over  $\text{Na}_2\text{SO}_4$ , concentrated, and purified by flash column chromatography ( $\text{SiO}_2$ , 20-25% EtOAc/Hexanes) to afford 53.6 mg (72%) of **10** as a white solid.

**IR** (film): 3318, 2967, 1742, 1716, 1662, 1450, 1366, 1054, 698.

**<sup>1</sup>H NMR** (major diastereomer) (500 MHz,  $\text{CDCl}_3$ )  $\delta$  7.44 – 7.28 (m, 5H), 6.32 (d,  $J = 8.7$  Hz, 1H), 5.77 (s, 1H), 5.19 (s, 1H), 4.54 (dd,  $J = 9.0, 4.9$  Hz, 1H), 3.74 (s, 3H), 2.11 – 2.03 (m, 1H), 1.41 (s, 9H), 0.74 (d,  $J = 6.9$  Hz, 3H), 0.69 (d,  $J = 6.9$  Hz, 3H).

**<sup>13</sup>C NMR** (major diastereomer) (126 MHz,  $\text{CDCl}_3$ )  $\delta$  172.31, 170.11, 155.17, 138.68, 129.22, 128.60, 127.38, 80.31, 59.08, 57.25, 52.43, 31.52, 28.47, 18.92, 17.47.

**HRMS** (+ ESI) Mass calcd. for  $\text{C}_{19}\text{H}_{28}\text{N}_2\text{O}_5$   $[\text{M}+\text{Na}]^+$ : 387.1890, Found  $[\text{M}+\text{Na}]^+$ : 387.1883

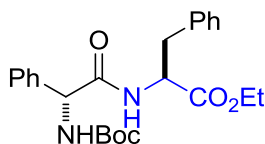

(S)-ethyl 2-((R)-2-((tert-butoxycarbonyl)amino)-2-phenylacetamido)-3-phenylpropanoate

**(11)**: To a 2 dram (8 mL) vial was added adduct **3a** (73 mg, 0.182 mmol), Phenylalanine ethyl ester<sup>7</sup> (105.4 mg, 0.545 mmol), and Dichloromethane (0.55 mL). The vial was sealed with a Septa-cap, and cooled to  $-45\text{ }^{\circ}\text{C}$  in cryogenic bath for 15 minutes before TASF (60 mg, 0.218 mmol) in DCM (0.12 mL) (1.8 M) was added dropwise over 5 minutes. The reaction was allowed to stir for 5 hours at  $-45\text{ }^{\circ}\text{C}$  before being quenched slowly by the dropwise addition of a 1.0 M solution of Trifluoroacetic acid in DCM (2 mL, 2 mmol) over 5 minutes. Aq. HCl (1.0M, 3 mL) was added and the reaction was warmed to ambient temperature, diluted with EtOAc (20 mL), and washed aq. HCl (1.0 M, 10 mL, 2x), sat.  $\text{NaHCO}_3$  (10 mL), and brine (5 mL).<sup>8</sup> The organic layer was separated and dried over  $\text{Na}_2\text{SO}_4$ , concentrated, and purified by flash column chromatography ( $\text{SiO}_2$ , 20-25% EtOAc/Hexanes) to afford 54.2 mg (70%) of **11** as a white solid.

**IR** (film): 3320, 2978, 2931, 1734, 1717, 1662, 1497, 1367, 1168, 699.

**<sup>1</sup>H NMR** (major diastereomer) (500 MHz,  $\text{CDCl}_3$ )  $\delta$  7.40 – 7.28 (m, 5H), 7.14 (t,  $J = 7.4$  Hz, 1H), 7.06 (t,  $J =$

<sup>7</sup> Free base obtained by washing the amino ester hydrochloride salt with sat. aq.  $\text{K}_2\text{CO}_3$ , extraction with DCM, and concentration. The concentrated free base was stable for weeks in the fridge.

<sup>8</sup> It is essential to wash away excess free amine with aq. HCl prior to washing with aq.  $\text{NaHCO}_3$  (to remove TFA) since the amine will react with the unreacted acyl cyanide at elevated temperatures and lead to noticeable epimerization.



7.5 Hz, 2H), 6.66 (d,  $J = 6.2$  Hz, 2H), 6.15 (s, 1H), 5.82 (s, 1H), 5.08 (s, 1H), 4.87 (dt,  $J = 8.0, 5.4$  Hz, 1H), 4.22 – 4.11 (m, 2H), 3.03 – 2.88 (m, 2H), 1.41 (s, 9H), 1.25 (t,  $J = 7.2$  Hz, 3H).

$^{13}\text{C}$  NMR (major diastereomer) (126 MHz,  $\text{CDCl}_3$ )  $\delta$  171.09, 169.55, 155.18, 138.62, 135.37, 129.37, 129.32, 128.62, 128.58, 127.48, 127.13, 80.21, 61.85, 58.87, 53.27, 37.86, 28.49, 14.30.

HRMS (+ ESI) Mass calcd. for  $\text{C}_{24}\text{H}_{30}\text{N}_2\text{O}_5$   $[\text{M}+\text{Na}]^+$  : 449.2047, Found  $[\text{M}+\text{Na}]^+$  : 449.2043

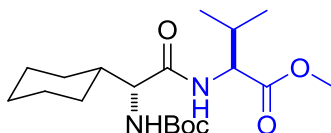

(S)-methyl 2-((R)-2-((tert-butoxycarbonyl)amino)-2-cyclohexylacetamido)-3-methylbutanoate

(**12**): To a 1 dram (4 mL) vial was added adduct **3a** (32 mg, 0.079 mmol), valine methyl ester<sup>7</sup> (20.6 mg, 0.157 mmol), and Dichloromethane (0.24 mL). The vial was sealed with a Septa-cap, and cooled to  $-78$  °C in cryogenic bath for 15 minutes before TASF (26 mg, 0.094 mmol) in DCM (0.052 mL) (1.8 M) was added dropwise over 5 minutes. The reaction was allowed to stir for 3 hours at  $-78$  °C, and another 5 hours at  $-45$  °C before being quenched with aq. HCl (1.0M, 2 mL). The reaction was warmed to ambient temperature, diluted with EtOAc (10 mL),  $\text{H}_2\text{O}$  (3mL), and brine (2 mL). The organic layer was separated and the aqueous layer was extracted with EtOAc (10 mL, 2x). The combined organic solvents were dried over  $\text{Na}_2\text{SO}_4$ , concentrated, and purified by flash column chromatography ( $\text{SiO}_2$ , 20% EtOAc/Hexanes) to afford 27 mg (93%) of **12** as an amorphous solid.

IR (film): 3314, 2926, 2852, 1746, 1682, 1650, 1530, 1450, 1366, 1256, 1177, 1018

$^1\text{H}$  NMR (major diastereomer) (500 MHz,  $\text{CDCl}_3$ )  $\delta$  6.51 (d,  $J = 8.7$  Hz, 1H), 5.05 (s, 1H), 4.55 (dd,  $J = 8.7, 4.8$  Hz, 1H), 3.99 (s, 1H), 3.74 (s, 3H), 2.25 – 2.13 (m, 1H), 1.90 – 1.79 (m, 1H), 1.79 – 1.62 (m, 5H), 1.44 (d,  $J = 3.4$  Hz, 9H), 1.34 – 1.18 (m, 3H), 1.18 – 1.06 (m, 2H), 1.01 (ddd,  $J = 25.0, 12.5, 3.5$  Hz, 1H), 0.94 (d,  $J = 6.9$  Hz, 3H), 0.90 (d,  $J = 6.9$  Hz, 3H).

$^{13}\text{C}$  NMR (major diastereomer) (126 MHz,  $\text{CDCl}_3$ )  $\delta$  172.40, 171.62, 80.14, 59.86, 57.20, 52.33, 40.48, 31.37, 30.05, 28.50, 28.17, 26.29, 26.23, 26.18, 19.16, 17.94.

HRMS (+ ESI) Mass calcd. for  $\text{C}_{19}\text{H}_{34}\text{N}_2\text{O}_5\text{Si}$   $[\text{M}+\text{Na}]^+$  : 393.2360, Found  $[\text{M}+\text{Na}]^+$  : 393.2354.

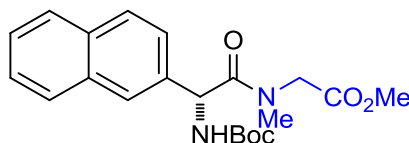

(R)-methyl 2-(2-((tert-butoxycarbonyl)amino)-N-methyl-2-(naphthalen-2-yl)acetamido)acetate

(**13**): To a 1 dram (4 mL) vial was added adduct **3b** (49 mg, 0.1085 mmol), sarcosine methyl ester<sup>7</sup> (33.6 mg, 0.325 mmol), and dichloromethane (0.33 mL). The vial was sealed with a Septa-cap, and cooled to  $-78$  °C in cryogenic bath for 15 minutes before TASF (36 mg, 0.13 mmol) in dichloromethane (0.072 mL) (1.8 M) was added dropwise over 5 minutes. The reaction was allowed to stir for 2 hours at  $-78$  °C, and another 5 hours at  $-45$  °C before being quenched by the dropwise addition of a 1.0 M solution of Trifluoroacetic acid in DCM (1 mL, 2 mmol) over 5 minutes. Aq. HCl (1.0M, 2 mL) was added and the reaction was warmed to ambient temperature, diluted with EtOAc (15 mL), and washed aq. HCl (1.0 M, 5 mL, 2x), sat.  $\text{NaHCO}_3$  (10 mL), and brine (5 mL).<sup>8</sup> The organic layer was separated and dried over  $\text{Na}_2\text{SO}_4$ , concentrated, and purified by flash column chromatography ( $\text{SiO}_2$ , 25-30% EtOAc/Hexanes) to afford 34 mg (81%) of **13** as an amorphous solid.

IR (film): - 3419, 3328, 2977, 2849, 1751, 1707, 1653, 1486, 1405, 1366, 1165, 751



**<sup>1</sup>H NMR** - (major rotamer) (500 MHz, CDCl<sub>3</sub>) δ 7.93 – 7.77 (m, 4H), 7.58 – 7.40 (m, 3H), 6.03 (d, J = 7.8 Hz, 1H), 5.80 (d, J = 7.9 Hz, 1H), 4.16 (dd, J = 145.6, 17.2 Hz, 2H), 3.73 (s, 3H), 2.95 (s, 3H), 1.41 (s, 9H).

**<sup>13</sup>C NMR** – (major rotamer) (126 MHz, CDCl<sub>3</sub>) δ 171.07, 169.35, 155.30, 134.89, 133.56, 133.29, 129.10, 128.40, 127.86, 127.40, 126.59, 126.54, 125.73, 80.02, 55.62, 52.38, 50.16, 36.57, 28.56

**HRMS** (+ ESI) Mass calcd. for C<sub>21</sub>H<sub>27</sub>N<sub>2</sub>O<sub>5</sub> [M+H]<sup>+</sup> : 387.1914, Found [M+Na]<sup>+</sup> : 387.1898.

**[α]<sup>23.6</sup><sub>D</sub>** = = - 147.6° (c = 1.0, CHCl<sub>3</sub>)

Enantiomeric ratio: 95.5:4.5, Rt<sub>1</sub> = 10.7, Rt<sub>2</sub> = 13.5, Chiralcel OD-H, 10% IPA/Hexanes, 1 mL/min

# $^1\text{H}$ and $^{13}\text{C}$ NMR Spectra

KY.03.295.1H

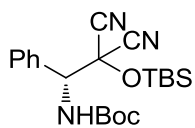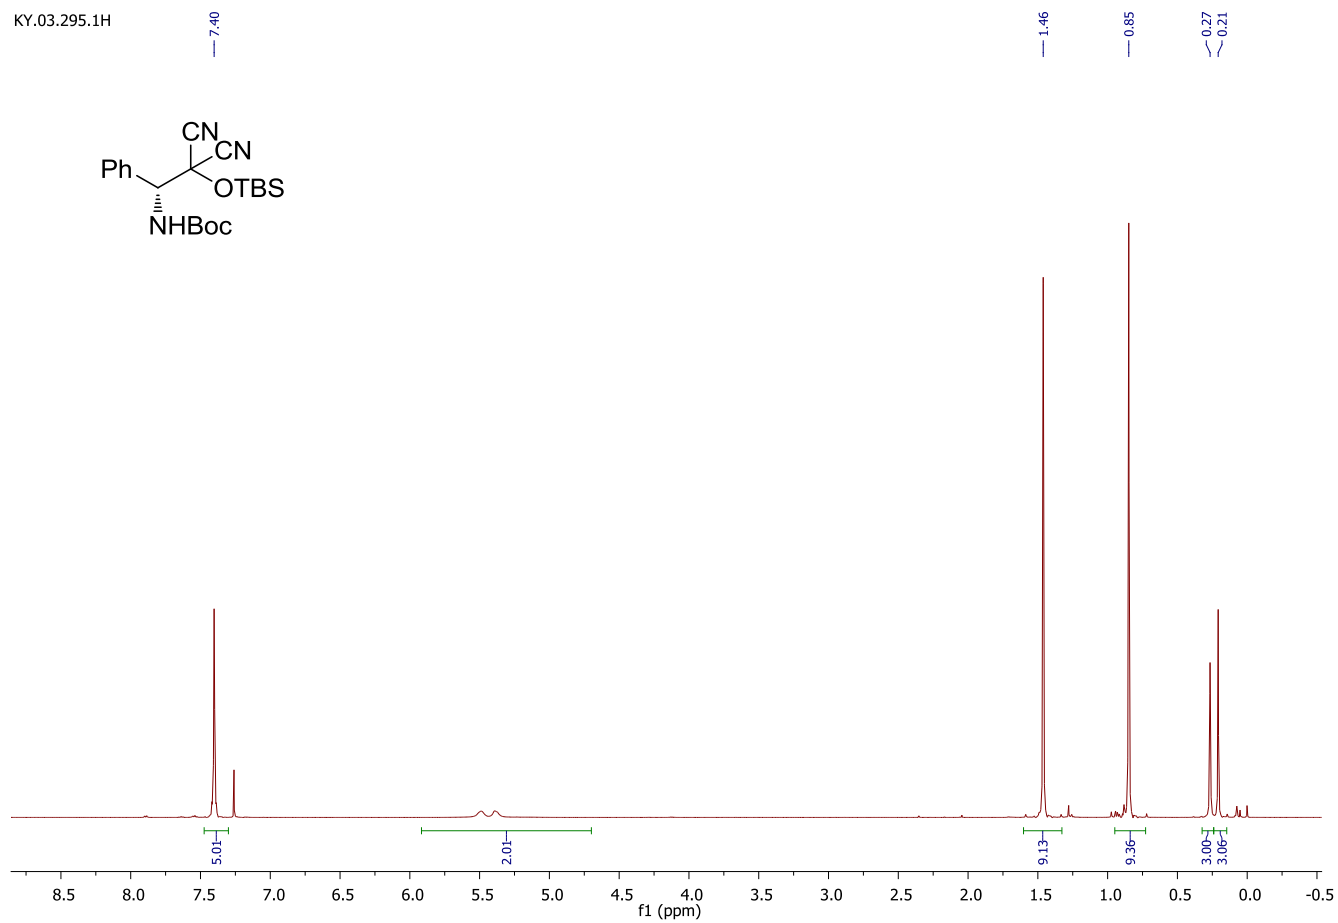

ky.03.295.13C

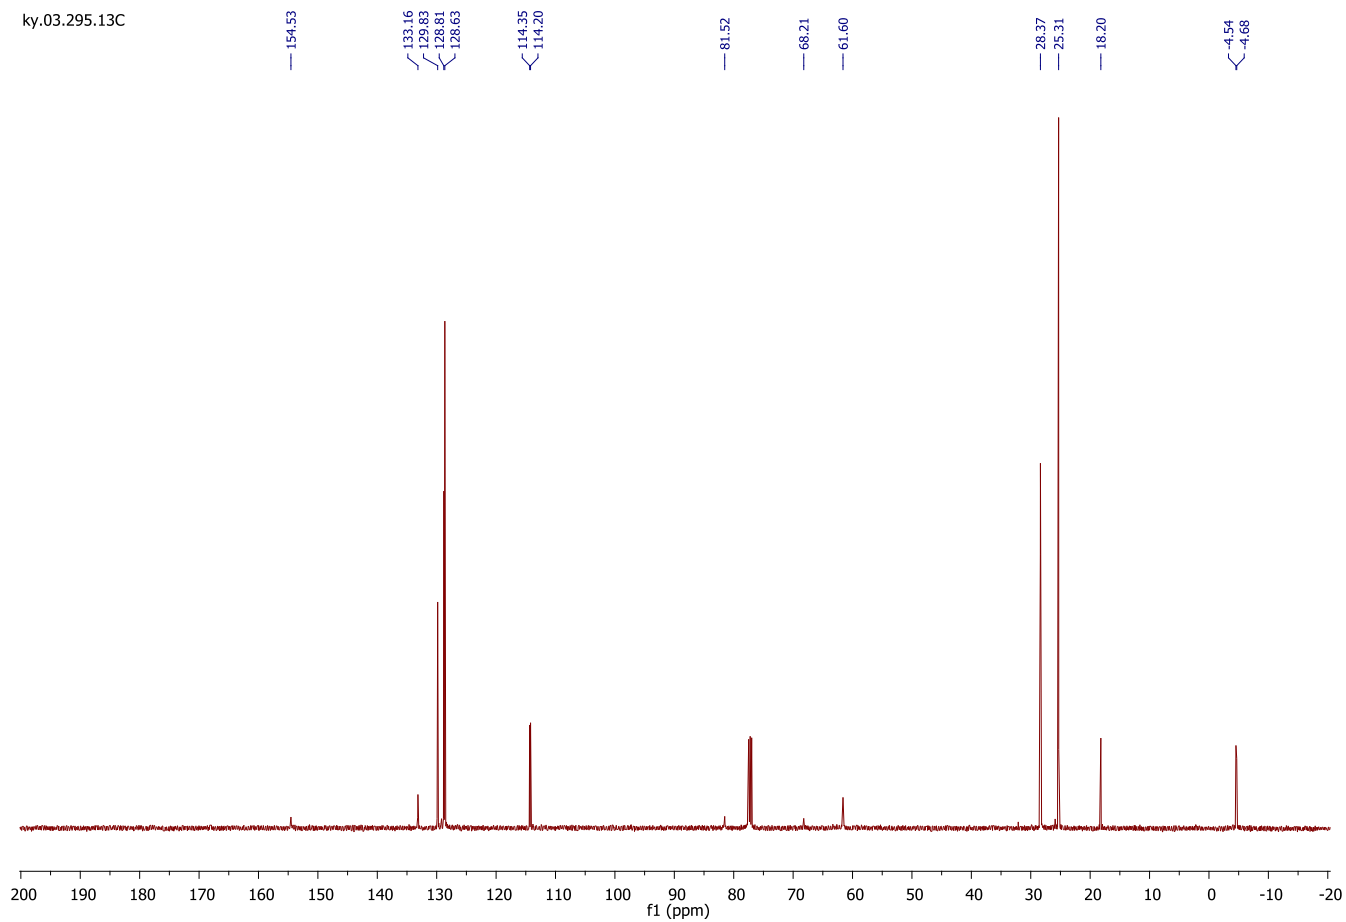



KY.03.297.Cl.1H

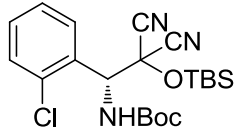

7.49  
7.47  
7.46  
7.45  
7.44  
7.36  
7.35  
7.34  
7.33

6.15

5.46

1.46

0.84

0.29  
0.29

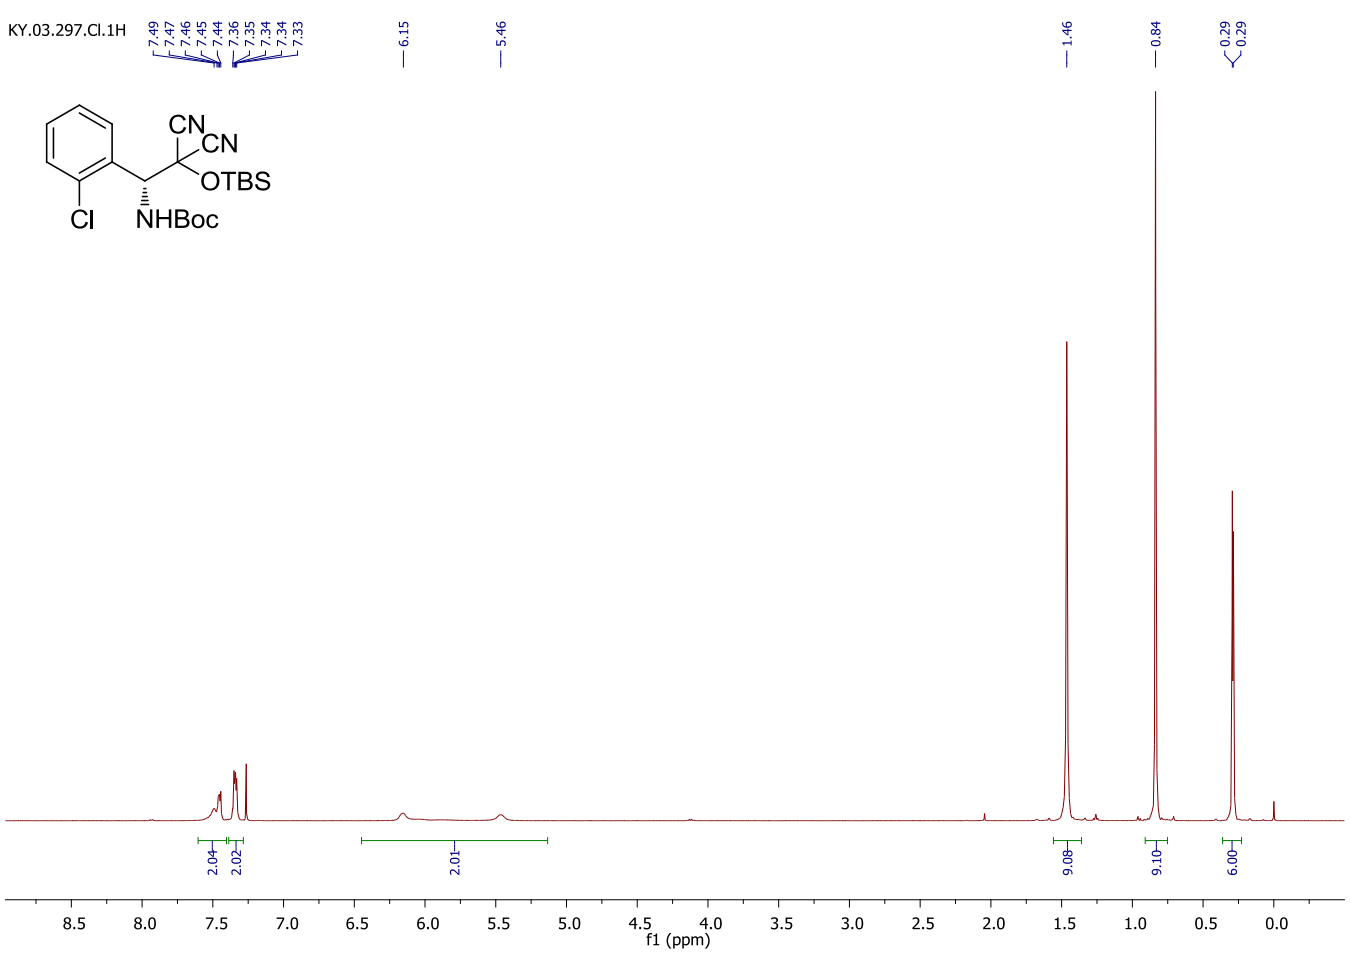

ky.03.297.Cl.13C

154.30

135.34  
132.10  
130.79  
130.35  
129.37  
127.49  
127.35

114.12

81.69

67.63

56.93

28.34

25.29

18.20

4.45  
4.62

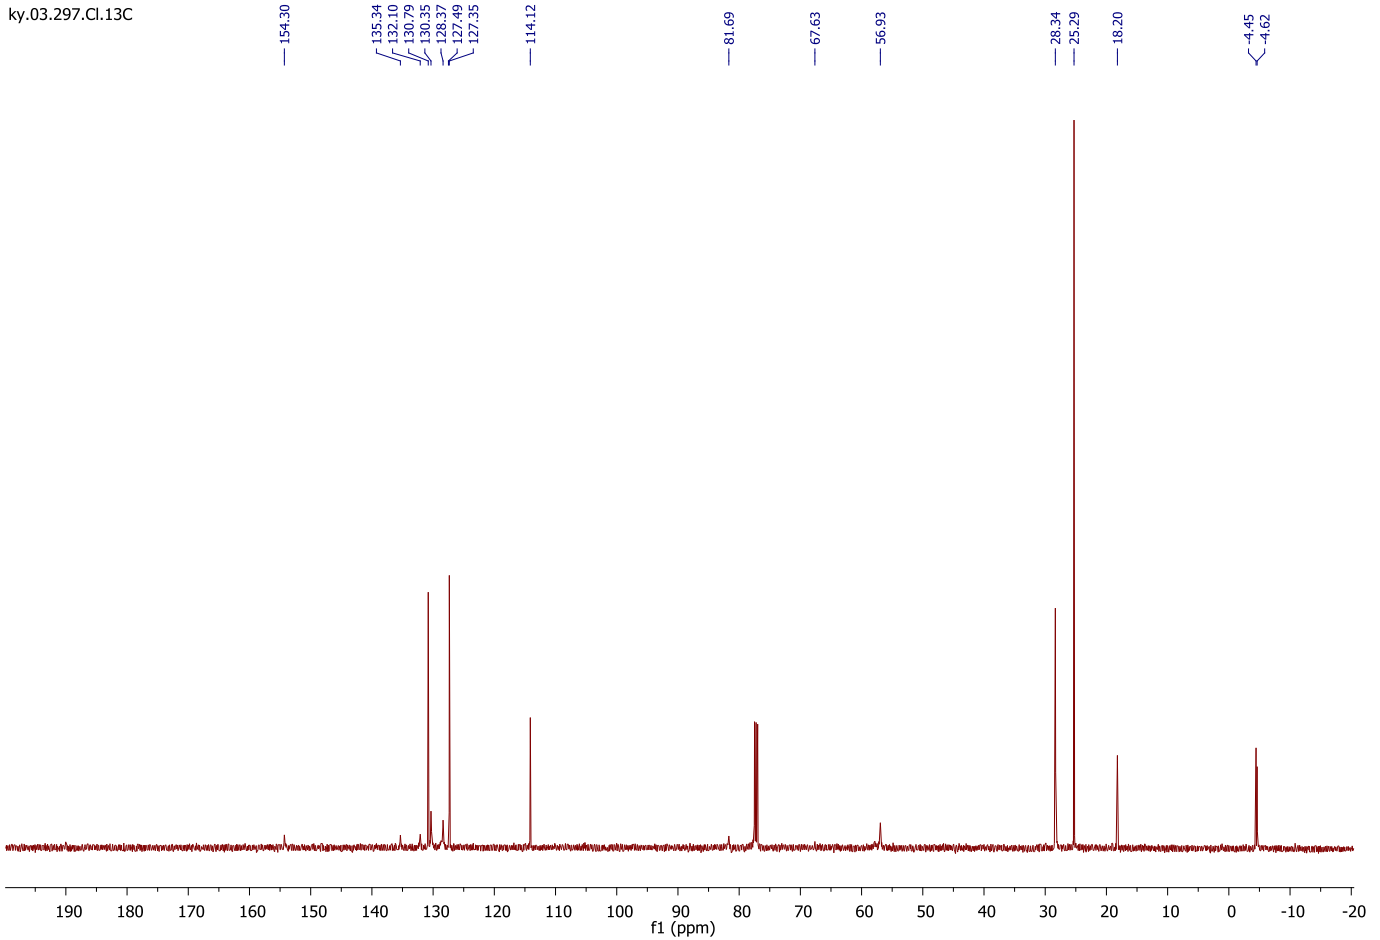

KY.04.43.diCl.1H

7.53  
7.51  
7.29  
7.27

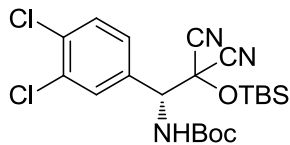

1.49  
0.91  
0.90  
0.32  
0.28

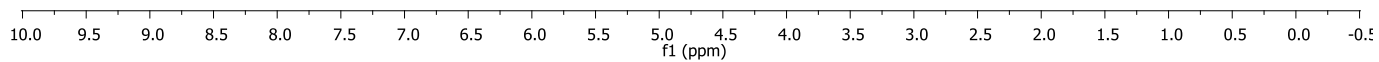

KY.04.43.diCl.13c

154.29  
134.31  
133.53  
133.18  
130.90  
130.81  
127.77  
113.94  
113.82  
82.18  
82.14  
67.66  
60.75  
28.38  
25.35  
18.26  
-4.50  
-4.57

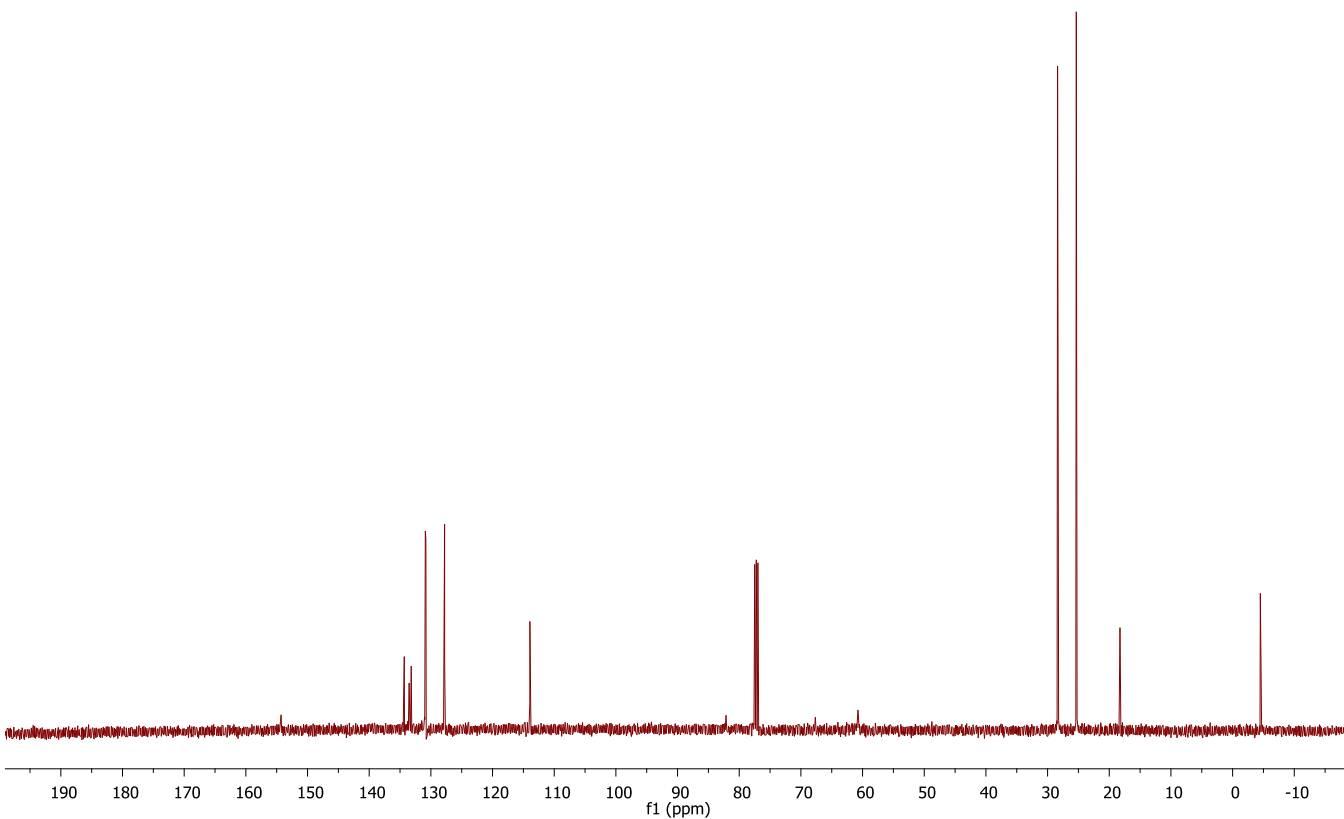

KY.04.25.CF3.1H

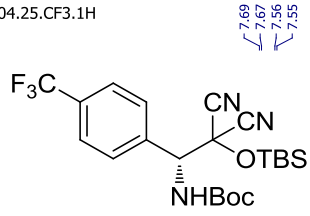

7.69  
7.67  
7.56  
7.55

5.57  
5.49

1.47

0.85

0.29  
0.23

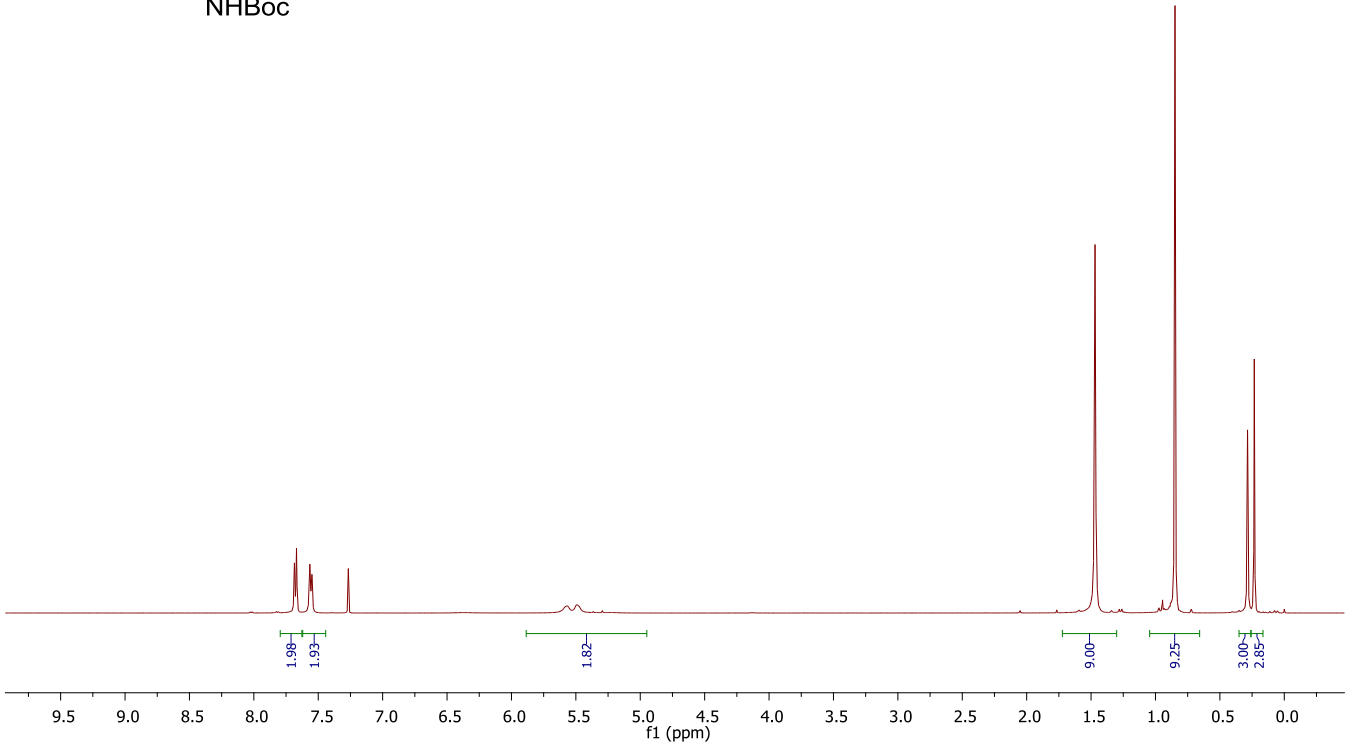

KY.04.25.CF3.13C

154.41  
137.23  
132.44  
132.17  
131.91  
131.66  
129.25  
127.12  
125.74  
125.72  
124.95  
122.79  
120.62

81.94

67.84

61.24

28.33

25.27

18.20

4.55

4.67

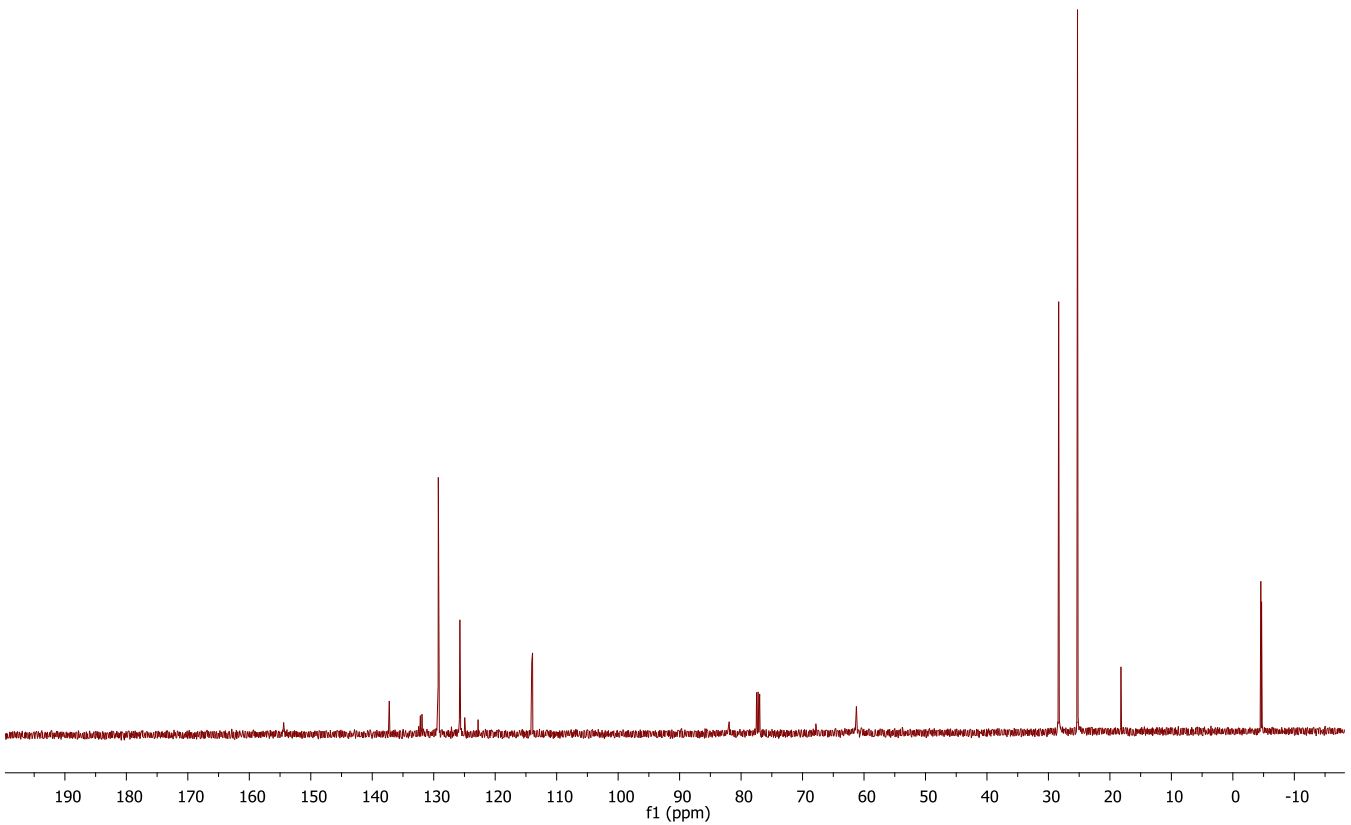

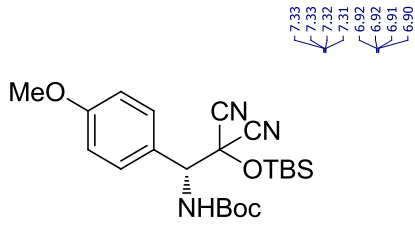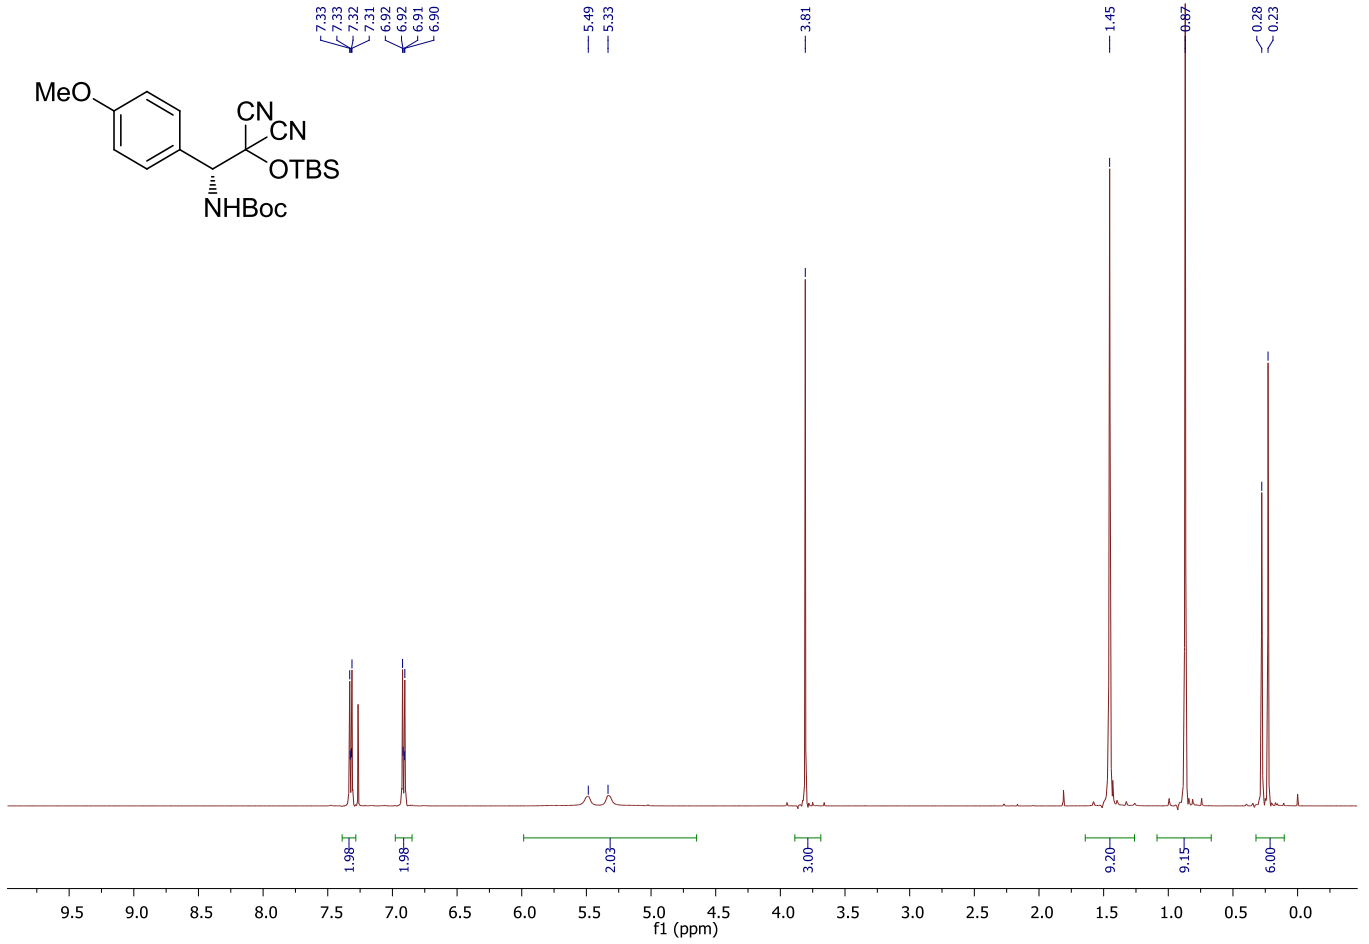

KY.04.28,pOMe.Pure.13C

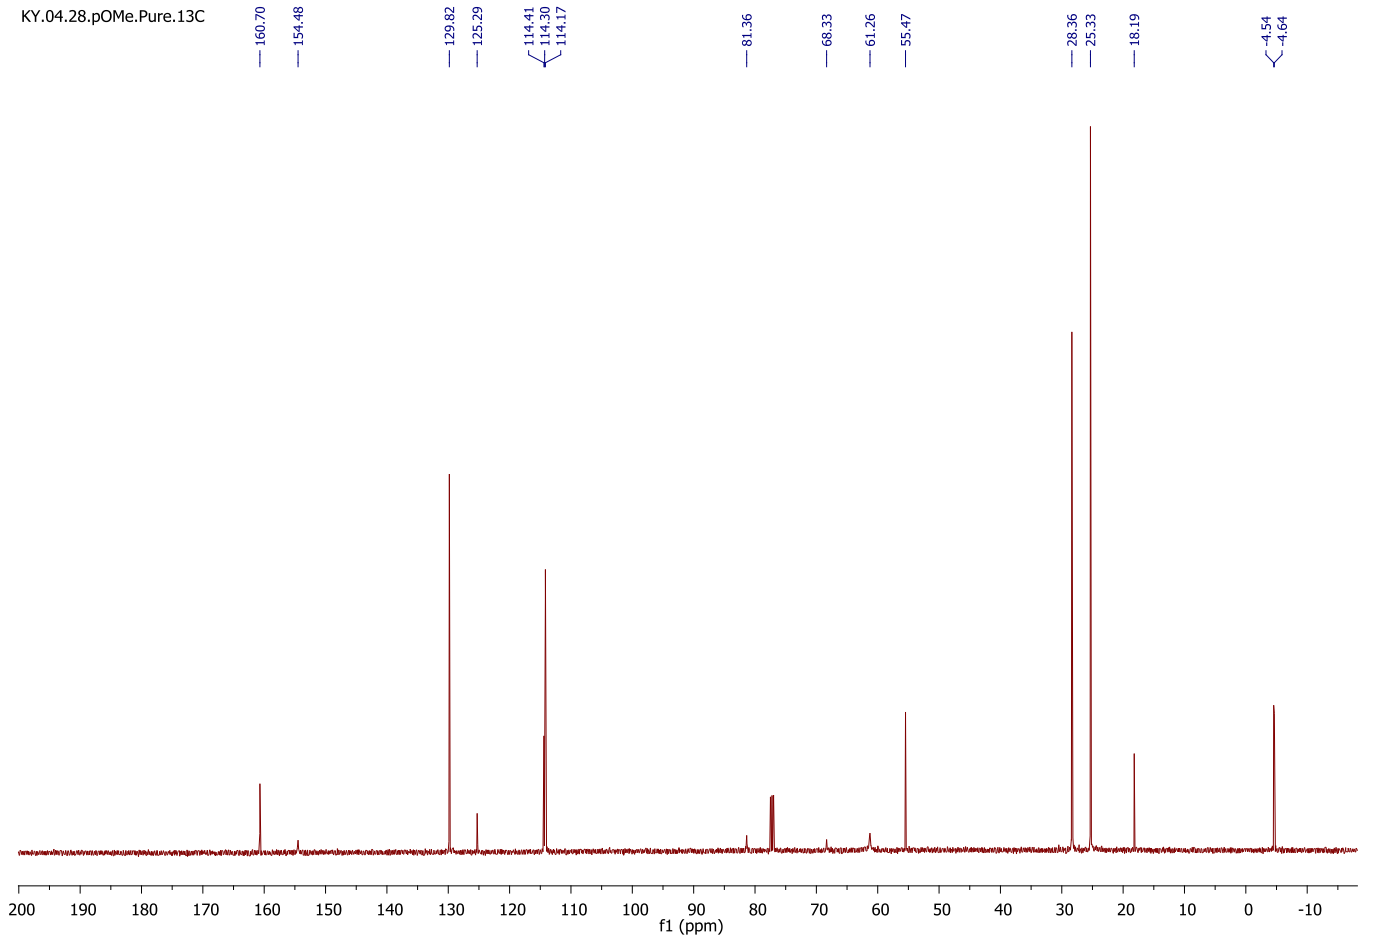

KY.04.21.OMe.1H.p

7.33  
7.31  
7.31  
7.30  
6.99  
6.98  
6.95  
6.94  
6.94  
6.93

5.49  
5.48  
5.35  
5.34

3.81

1.46

0.86

0.28  
0.23

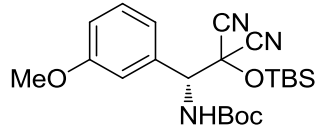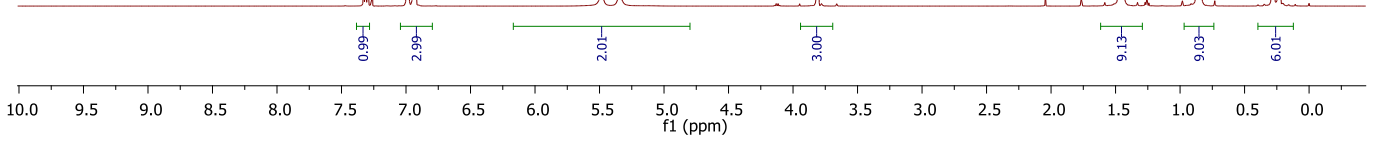

KY.04.21.OMe.13c.p

159.86

154.52

134.69

129.89

120.69

115.33

114.55

114.38

114.27

81.53

68.16

61.71

55.51

28.38

25.32

18.20

4.52

4.65

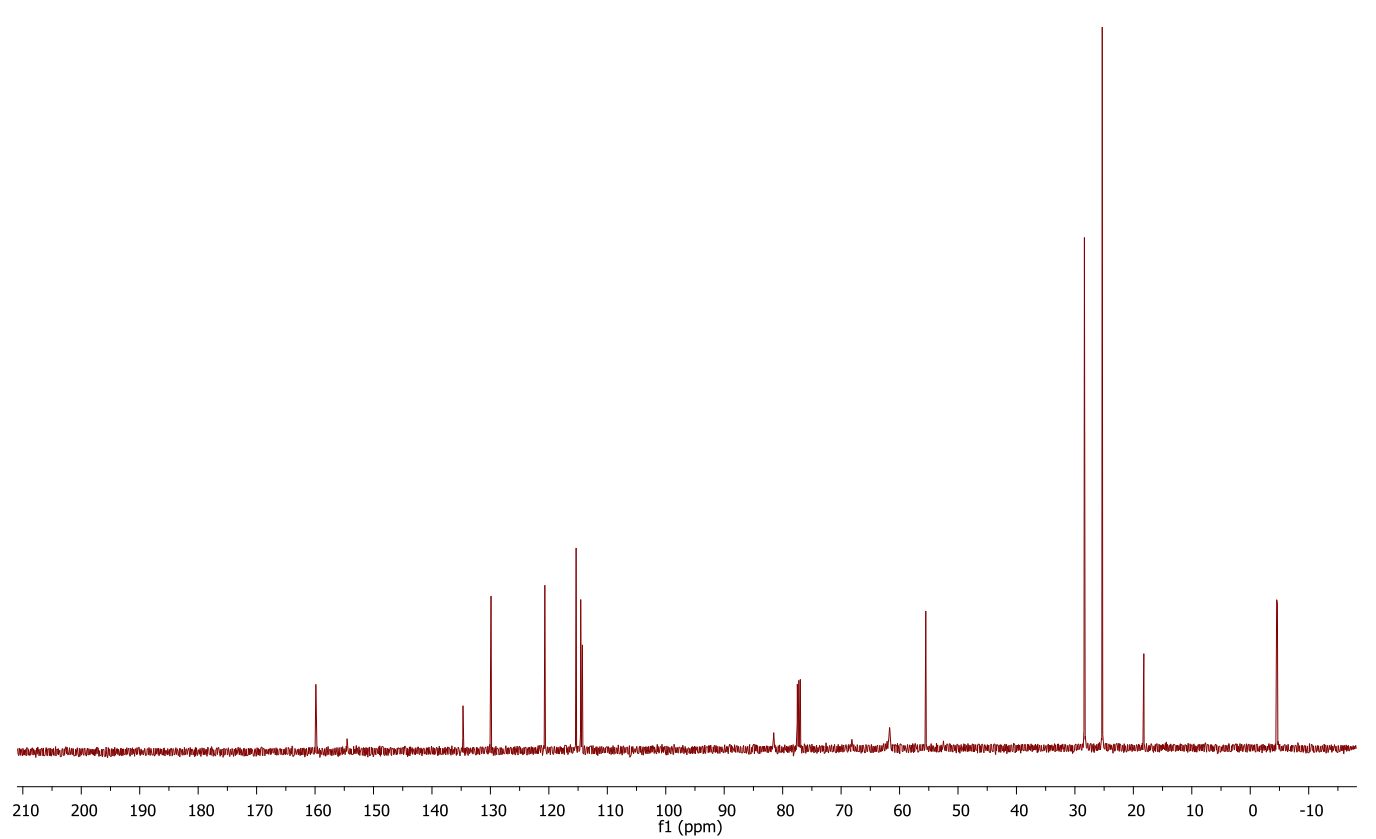







ky.04.034.thio.1H

7.36  
7.36  
7.35  
7.35  
7.22  
7.22  
7.05  
7.04  
7.04  
7.03

5.69  
5.67  
5.42

1.47

0.92

0.33  
0.30

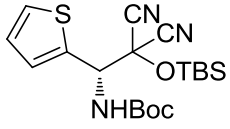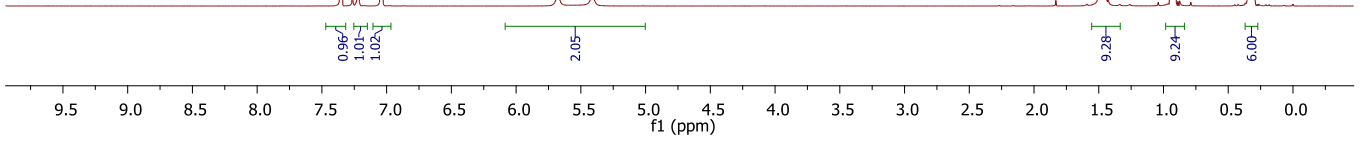

ky.04.034.thio.13C

154.28

135.24

128.17

127.11

127.05

114.05

113.98

81.63

68.13

58.08

28.20

25.32

23.19

18.19

4.53

4.64

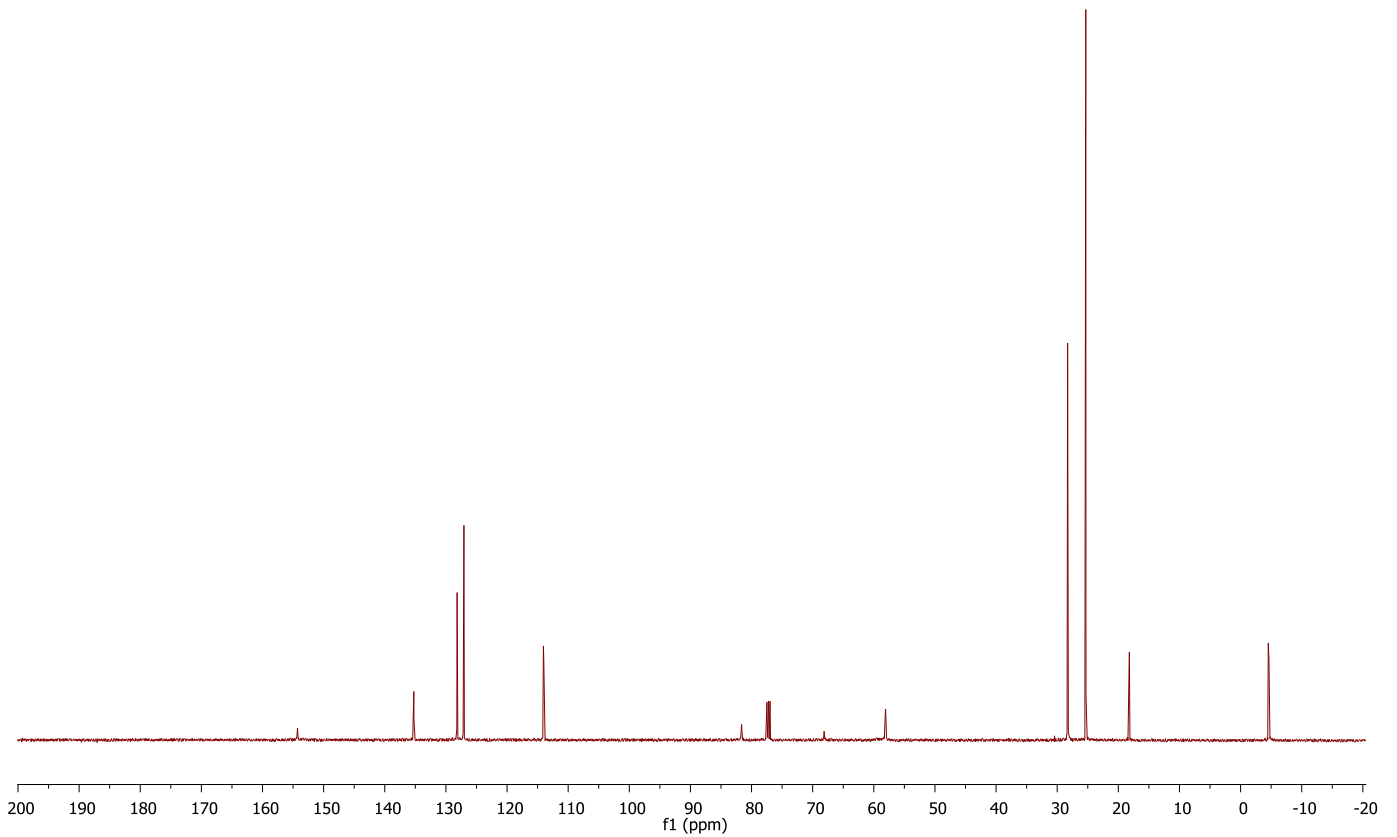

KY.04.33.3fur.1H

7.57  
7.46  
7.45  
7.45

6.53  
6.52

5.38  
5.26

1.47

0.90

0.33  
0.31

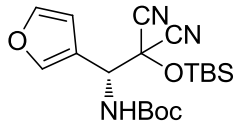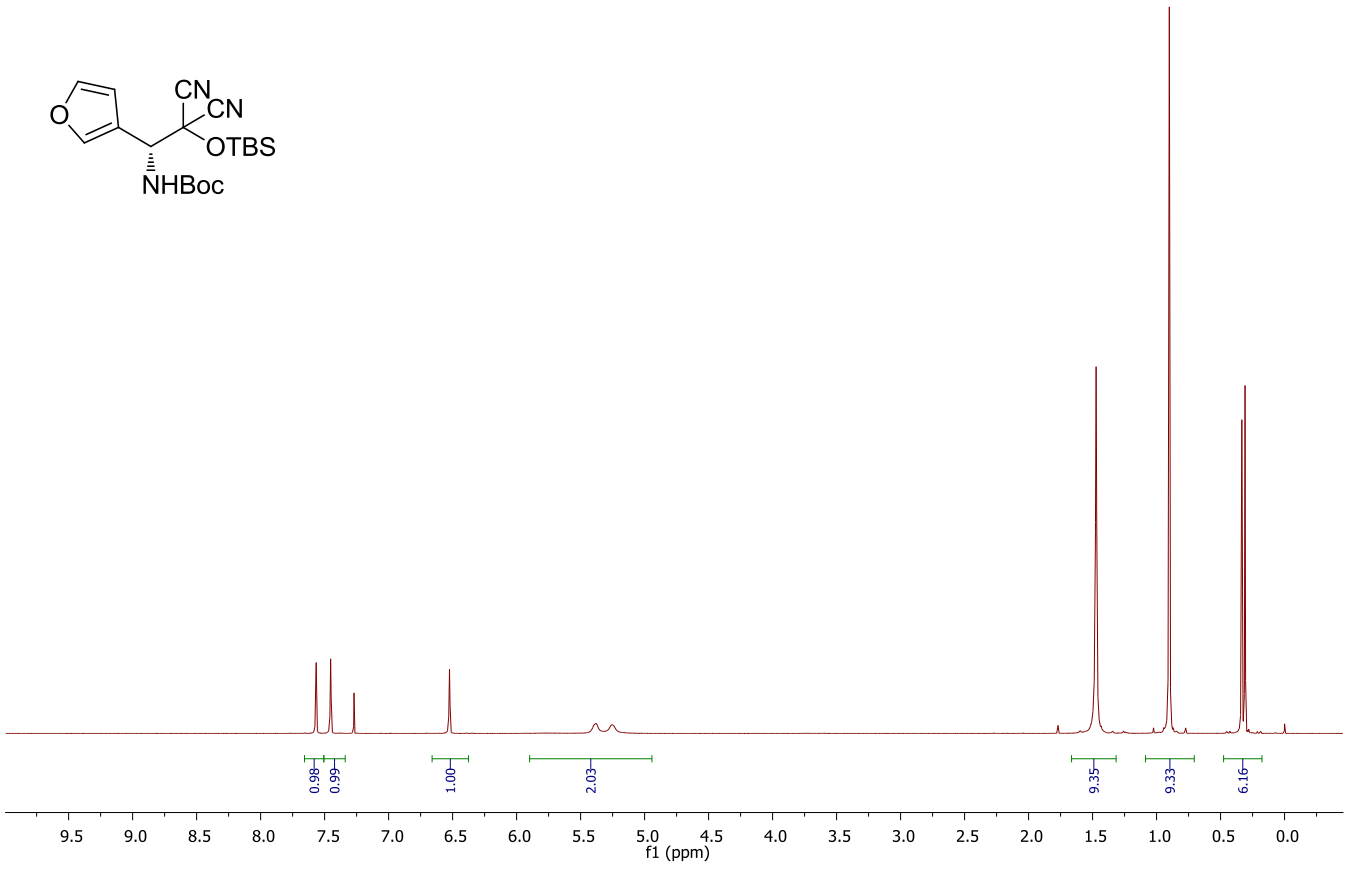

KY.04.33.3fur.13C

154.47

143.97  
141.89

118.82  
114.36  
114.31  
109.39

81.60

68.14

55.22

28.46  
28.36  
28.21  
25.53

18.21

-4.49  
-4.58

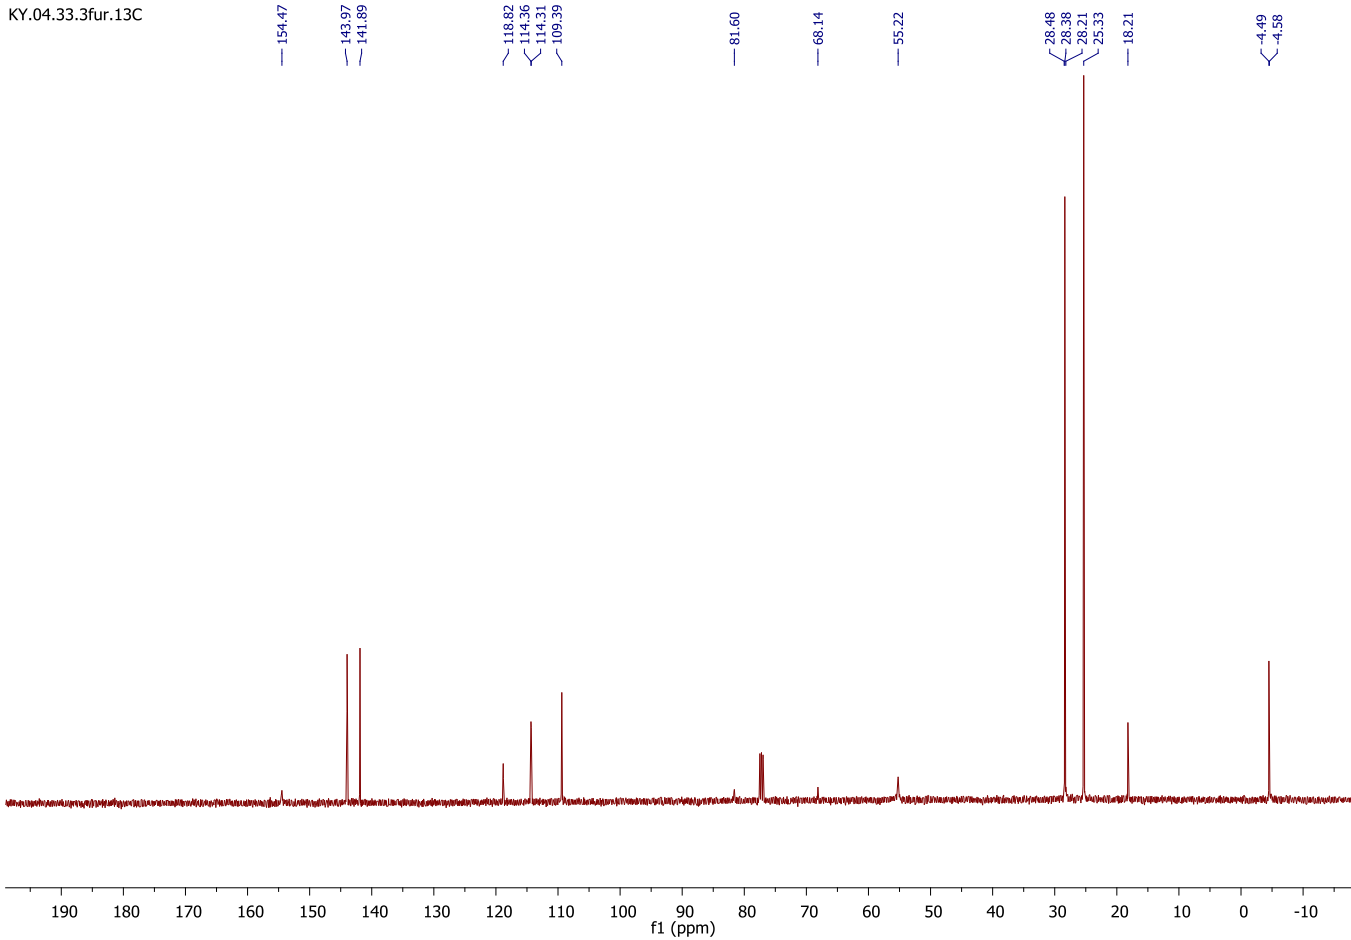

KY.04.36.cy.1H

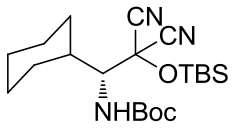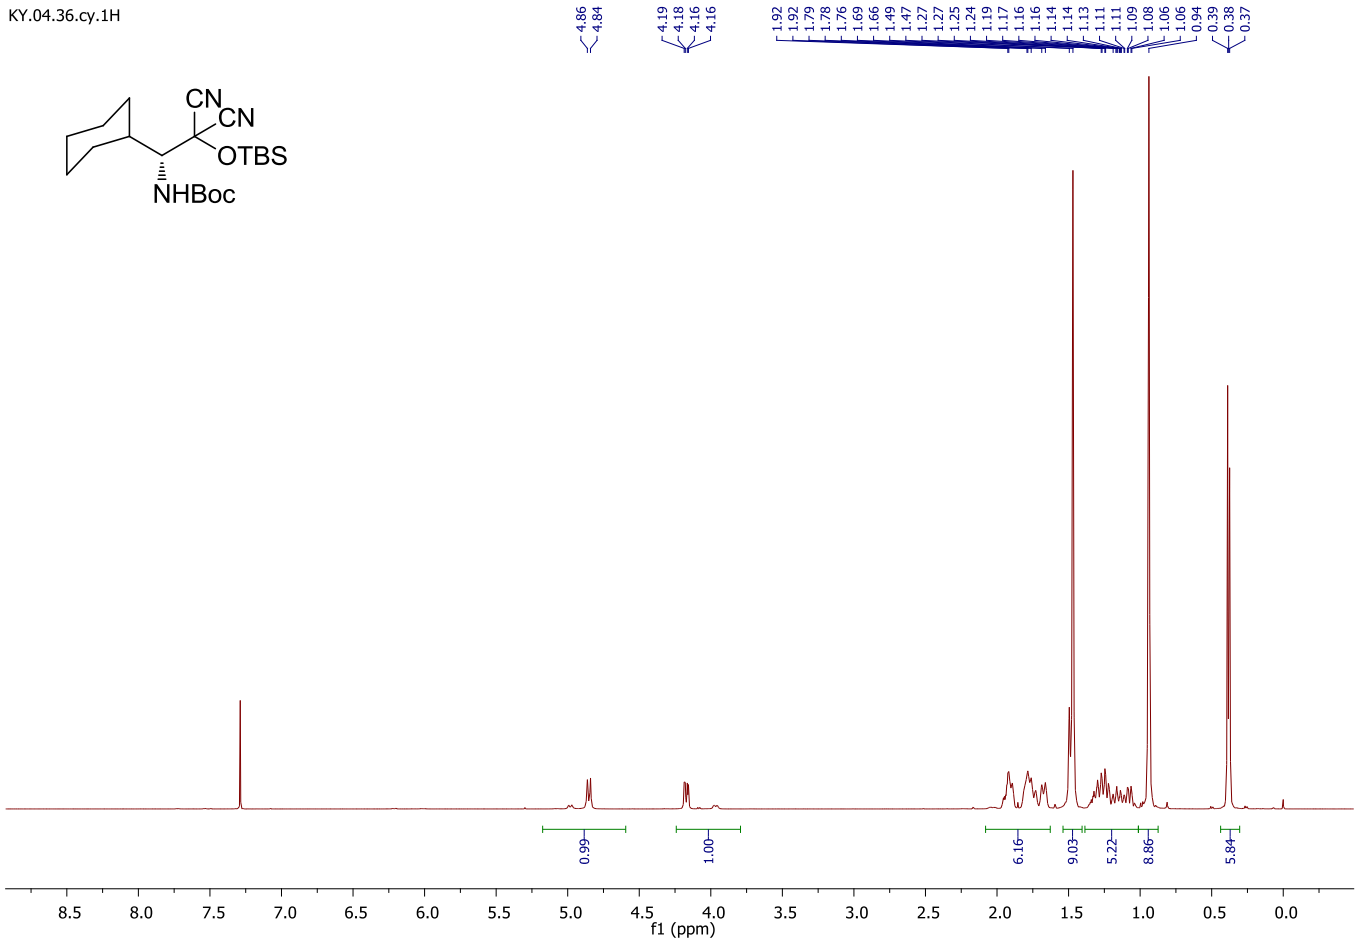

KY.04.36.cy.13C

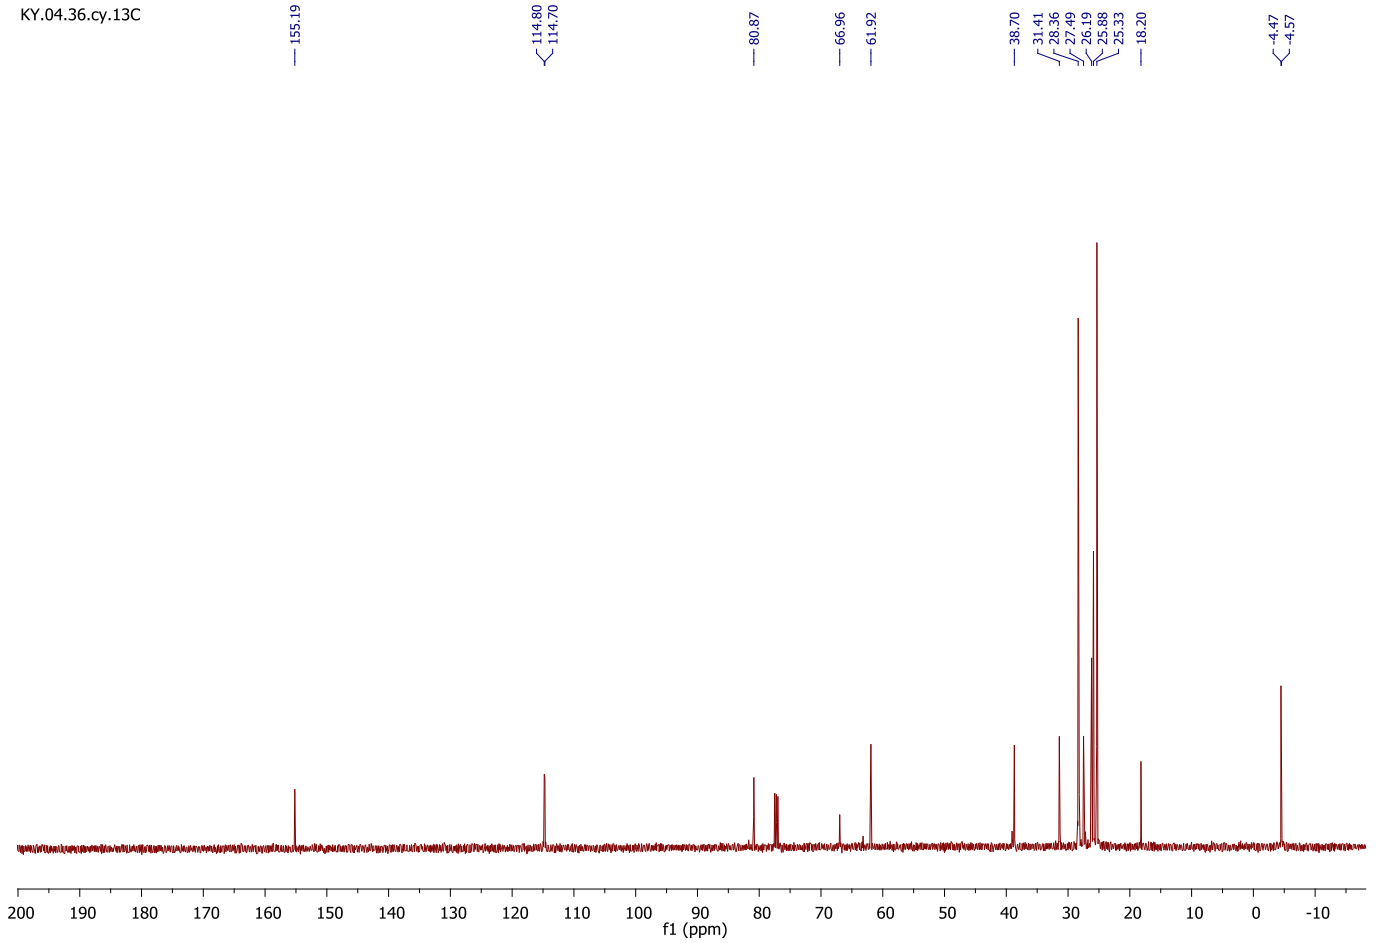

KY.03.301.1H

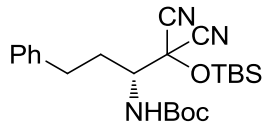

7.31  
7.30  
7.29  
7.23  
7.21  
7.20  
7.18  
7.16

4.73  
4.71  
4.30  
4.29  
4.27  
4.27  
4.25  
4.25

2.82  
2.81  
2.80  
2.79  
2.68  
2.68  
2.66  
2.65

2.22  
2.21  
2.19  
1.80  
1.79  
1.48  
1.47

0.94  
0.90

0.35  
0.33

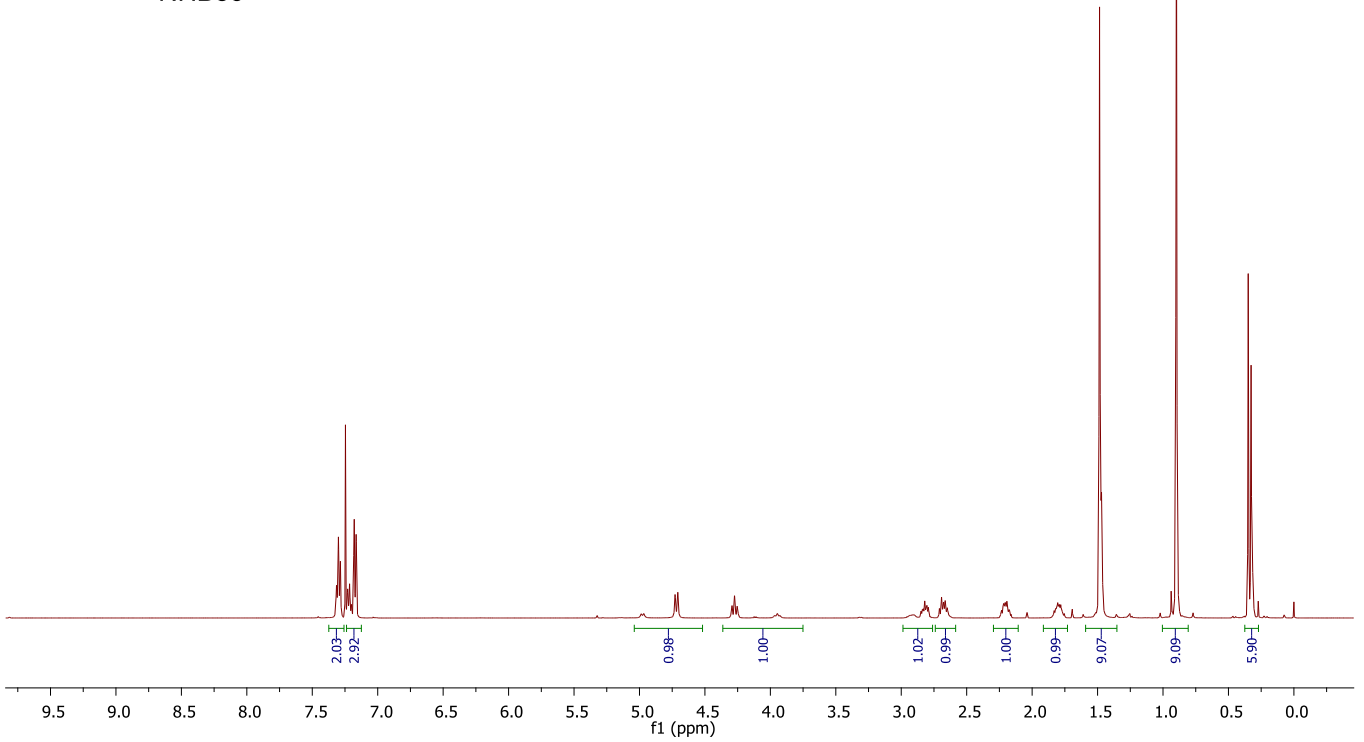

KY.03.301.13C

154.96

140.12

128.85

128.58

126.66

114.35

114.28

81.15

67.94

58.01

31.90

31.33

28.42

28.15

25.37

18.22

4.47

4.51

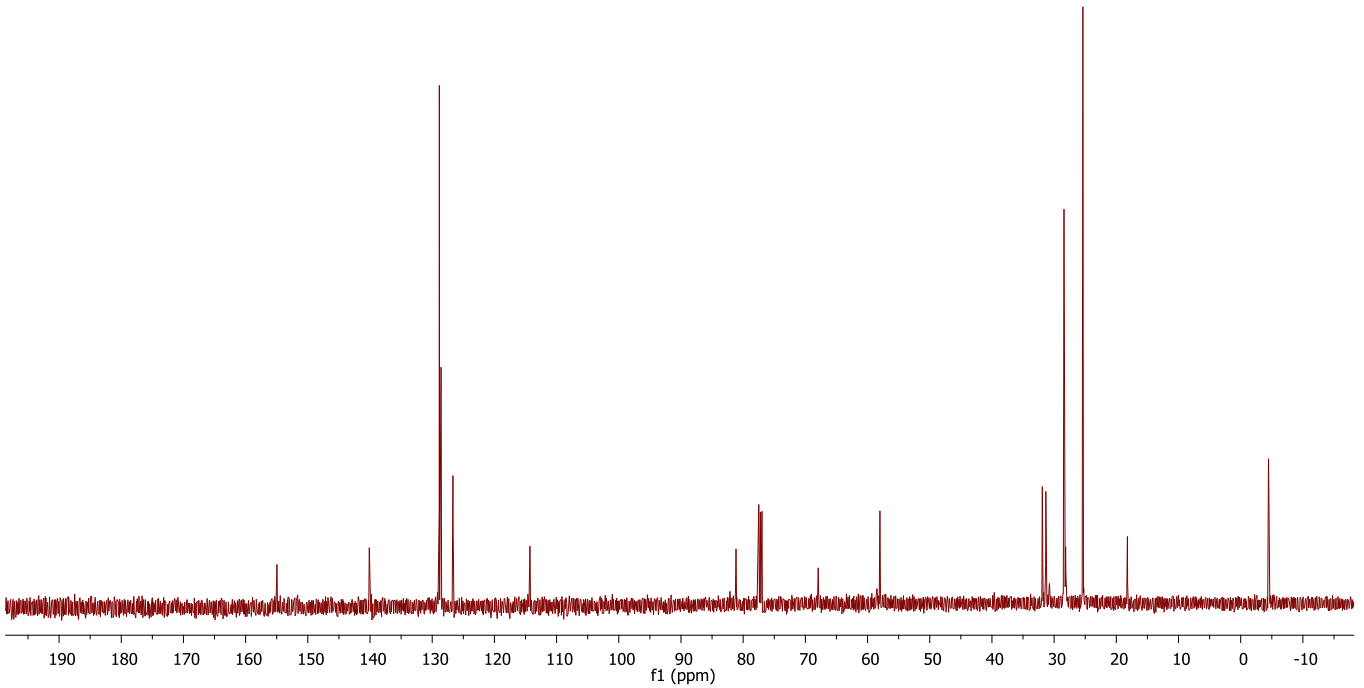

KY.04.84.MeEst.1H

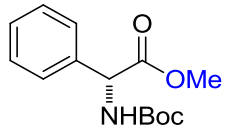

7.36  
7.35  
7.34  
7.34  
7.33  
7.32  
7.32  
7.31

5.57  
5.56  
5.33  
5.32

3.71

1.43

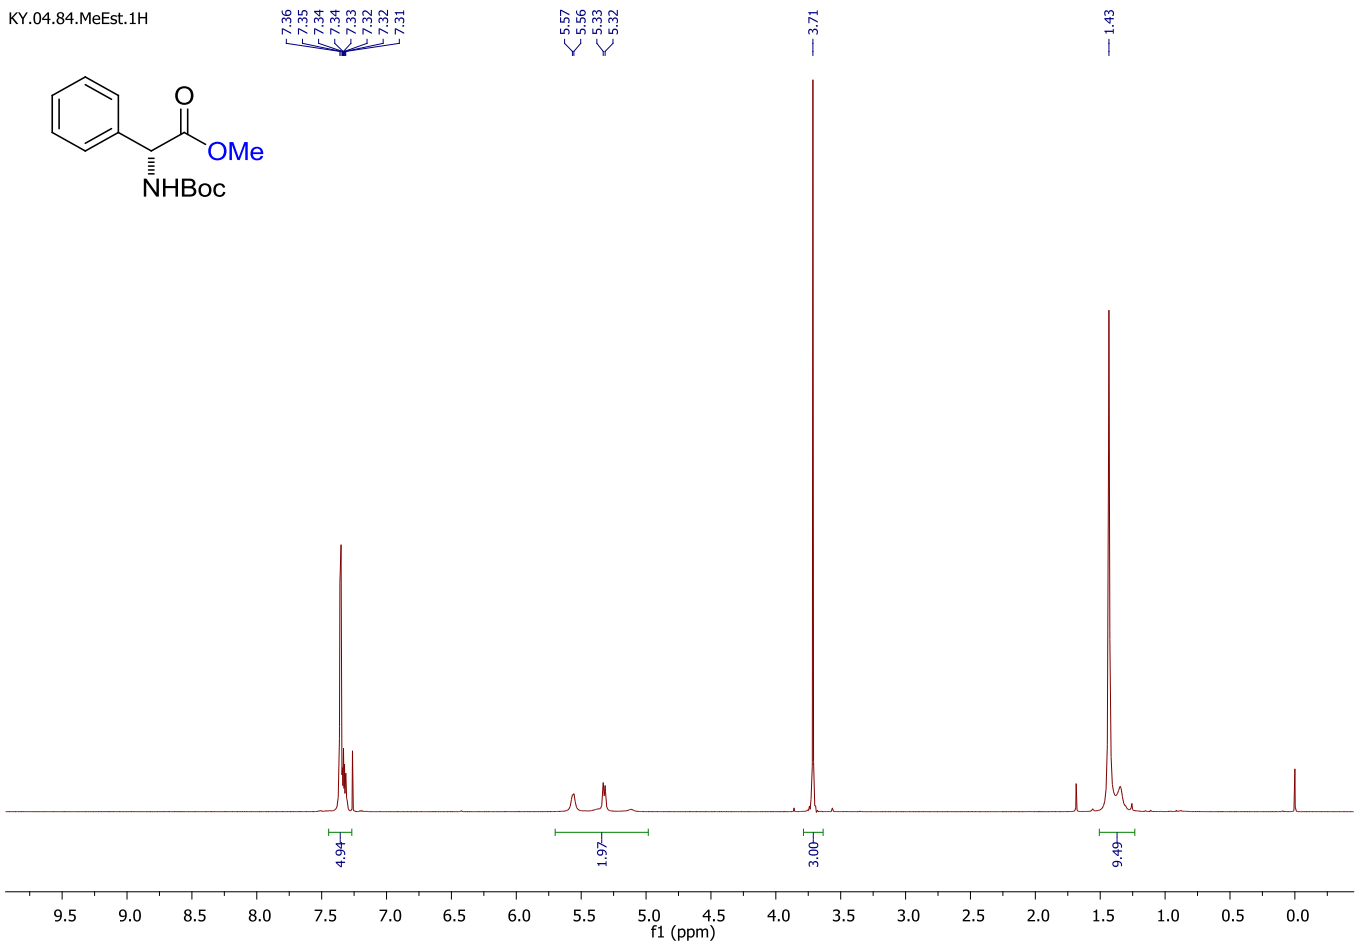

KY.04.84.meester.13C

171.85

155.02

137.14

129.09

128.63

127.34

80.35

57.82

52.85

52.83

28.50

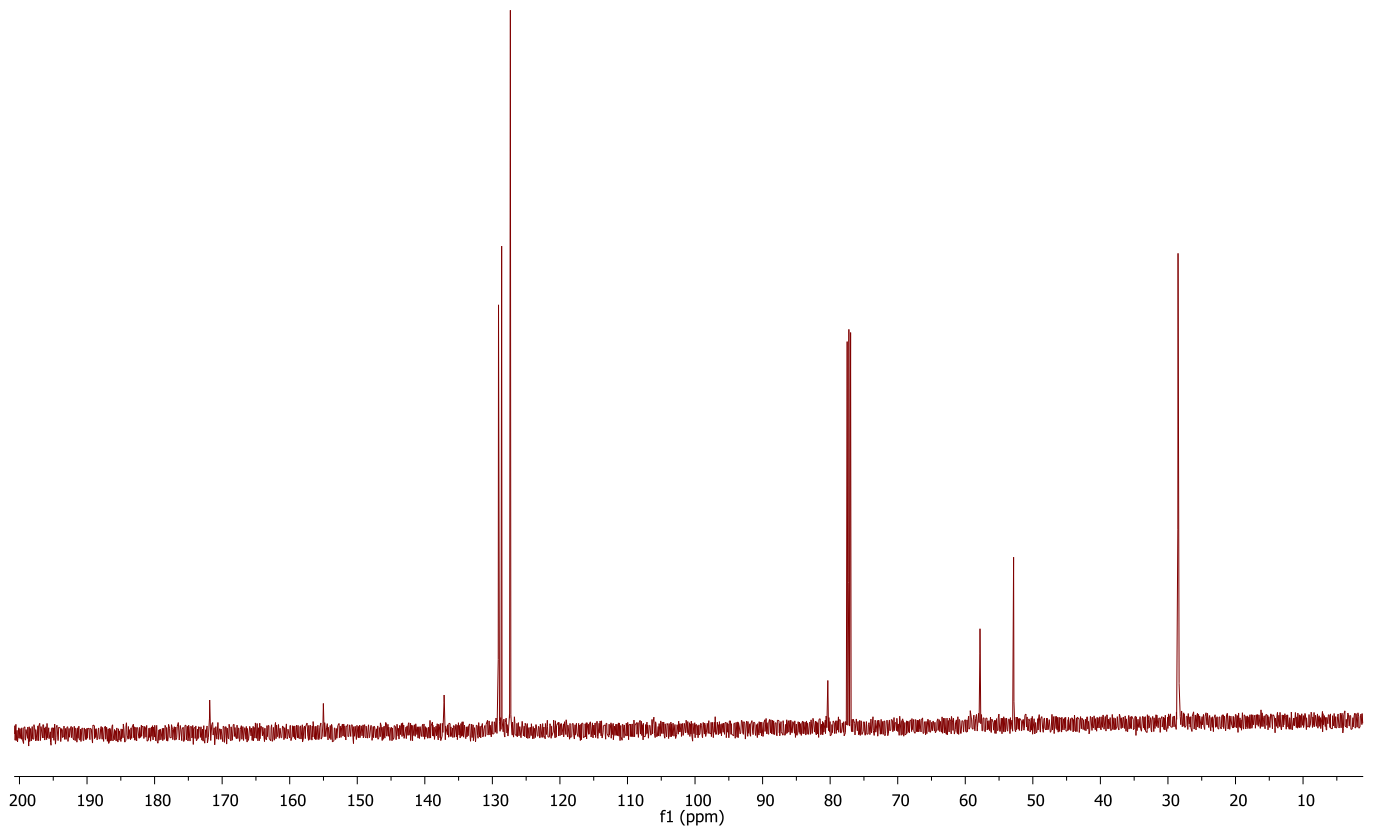

KY.04.72q.1H

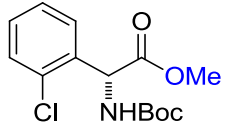

7.38  
7.37  
7.37  
7.36  
7.36  
7.35  
7.26  
7.25  
7.25  
7.24  
7.24

5.73  
5.72  
5.70

3.71

1.42  
1.36  
1.33

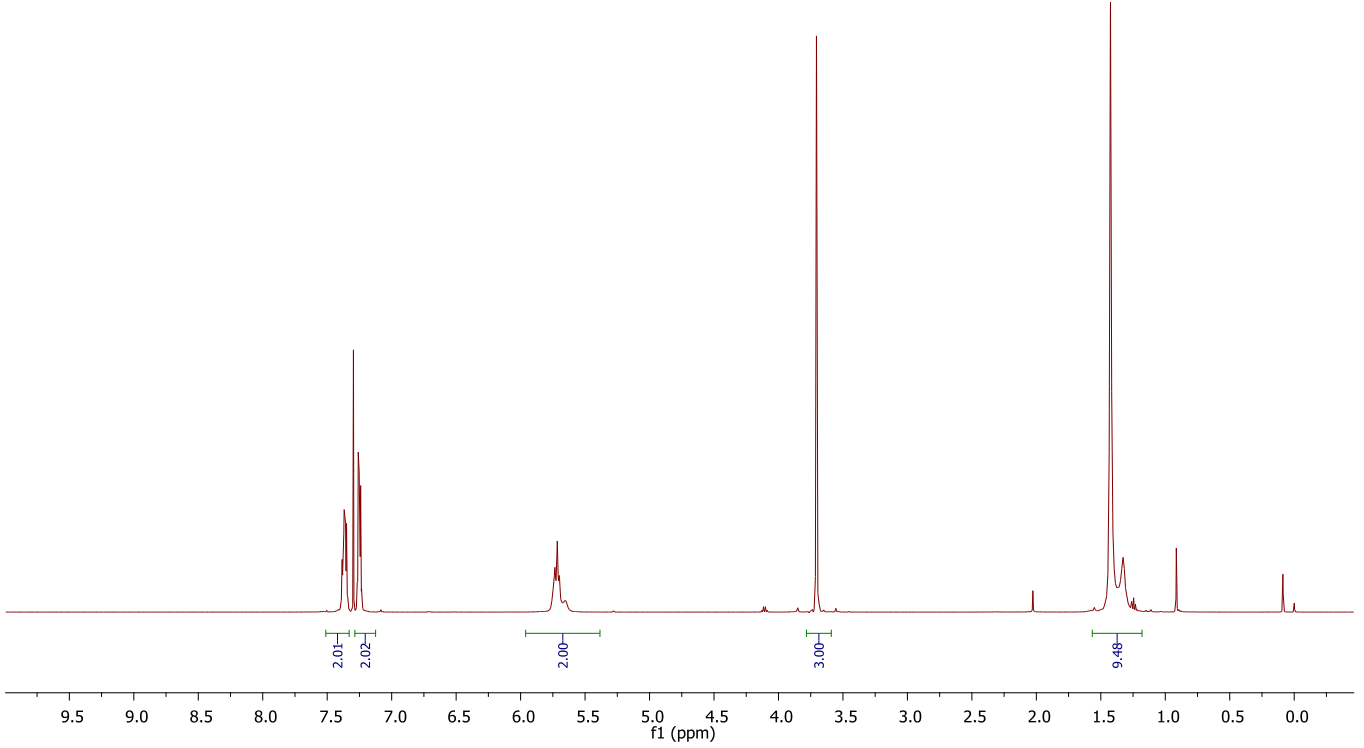

KY.04.72q.13C

171.15

154.94

135.37

133.70

130.17

129.88

129.67

127.33

80.27

55.70

52.91

28.36

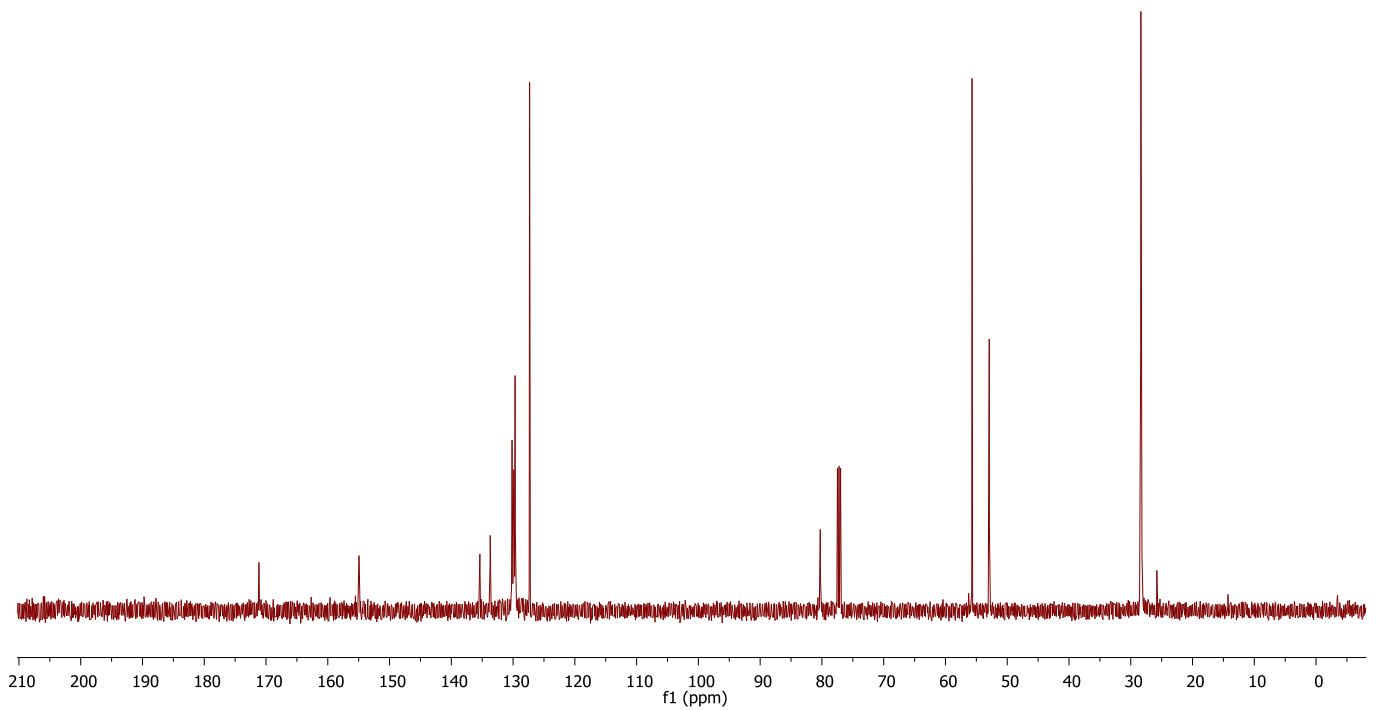



KY.04.85.pyr.amide.1H

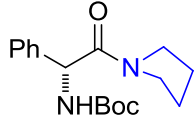

7.40  
7.39  
7.35  
7.34  
7.32  
7.31  
7.30  
7.29  
7.28

6.06  
6.05

5.38  
5.36

3.98  
3.57  
3.56  
3.55  
3.54  
3.43  
3.42  
3.41  
3.07  
3.06  
3.05

1.91  
1.90  
1.85  
1.85  
1.82  
1.81  
1.80  
1.79  
1.77  
1.45  
1.41  
1.35

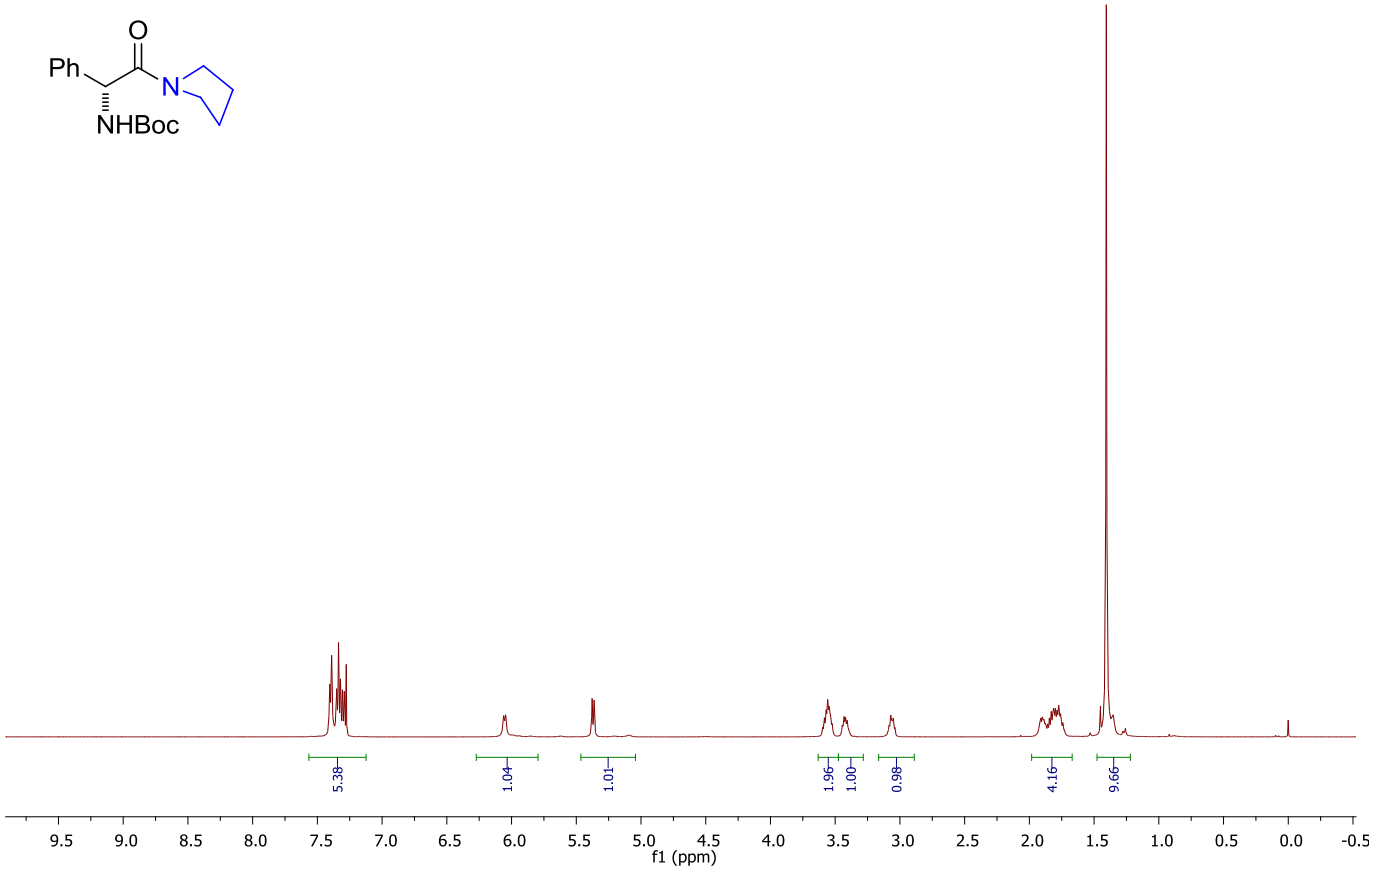

KY.04.85.pyr.amide.13C

168.59

155.23

138.04

129.06

128.26

128.10

79.75

56.73

46.38

46.28

28.54

26.07

24.14

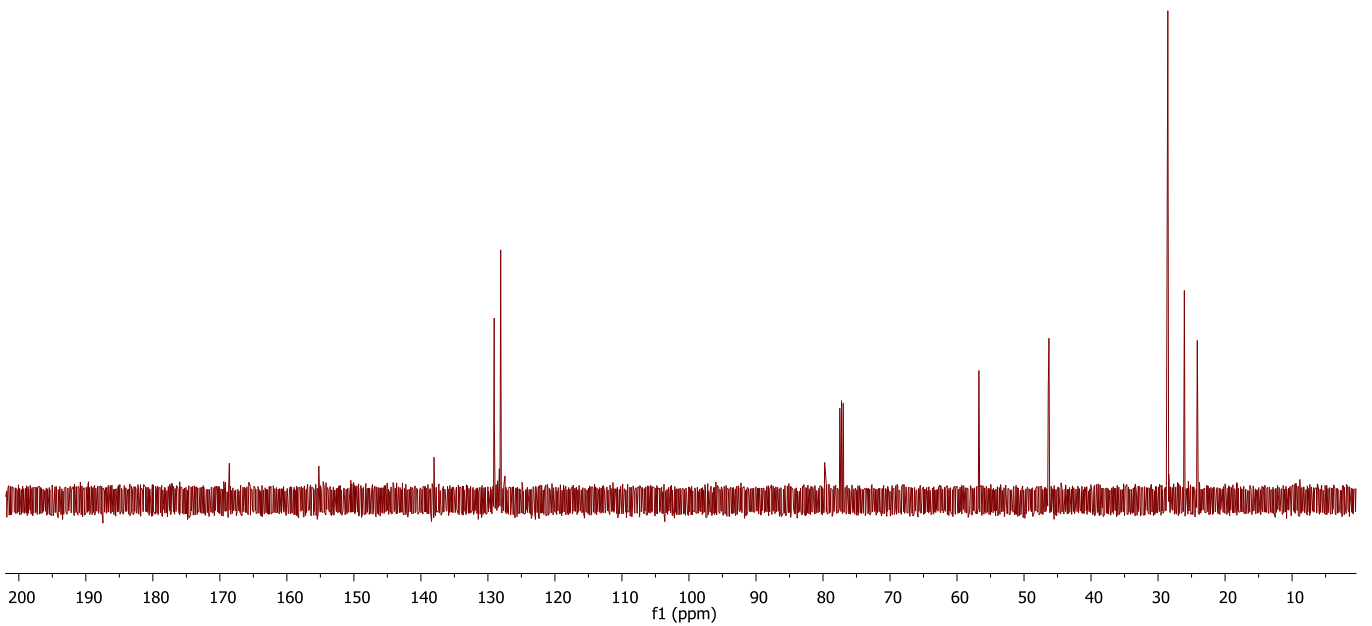

KY.04.73.S.1H

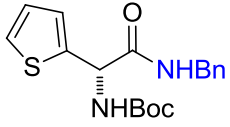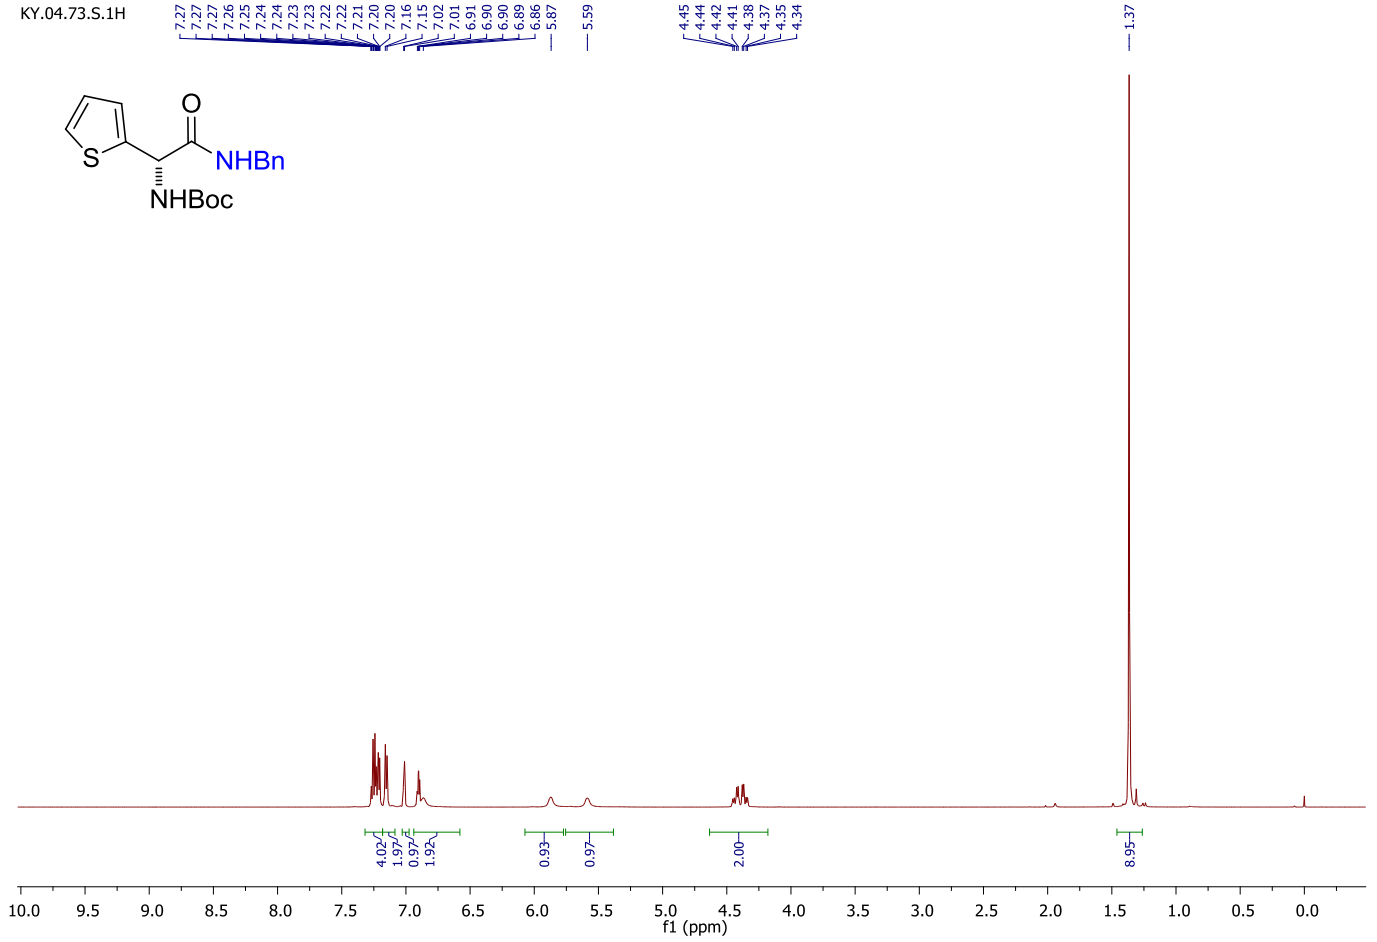

KY.04.73.S.13C

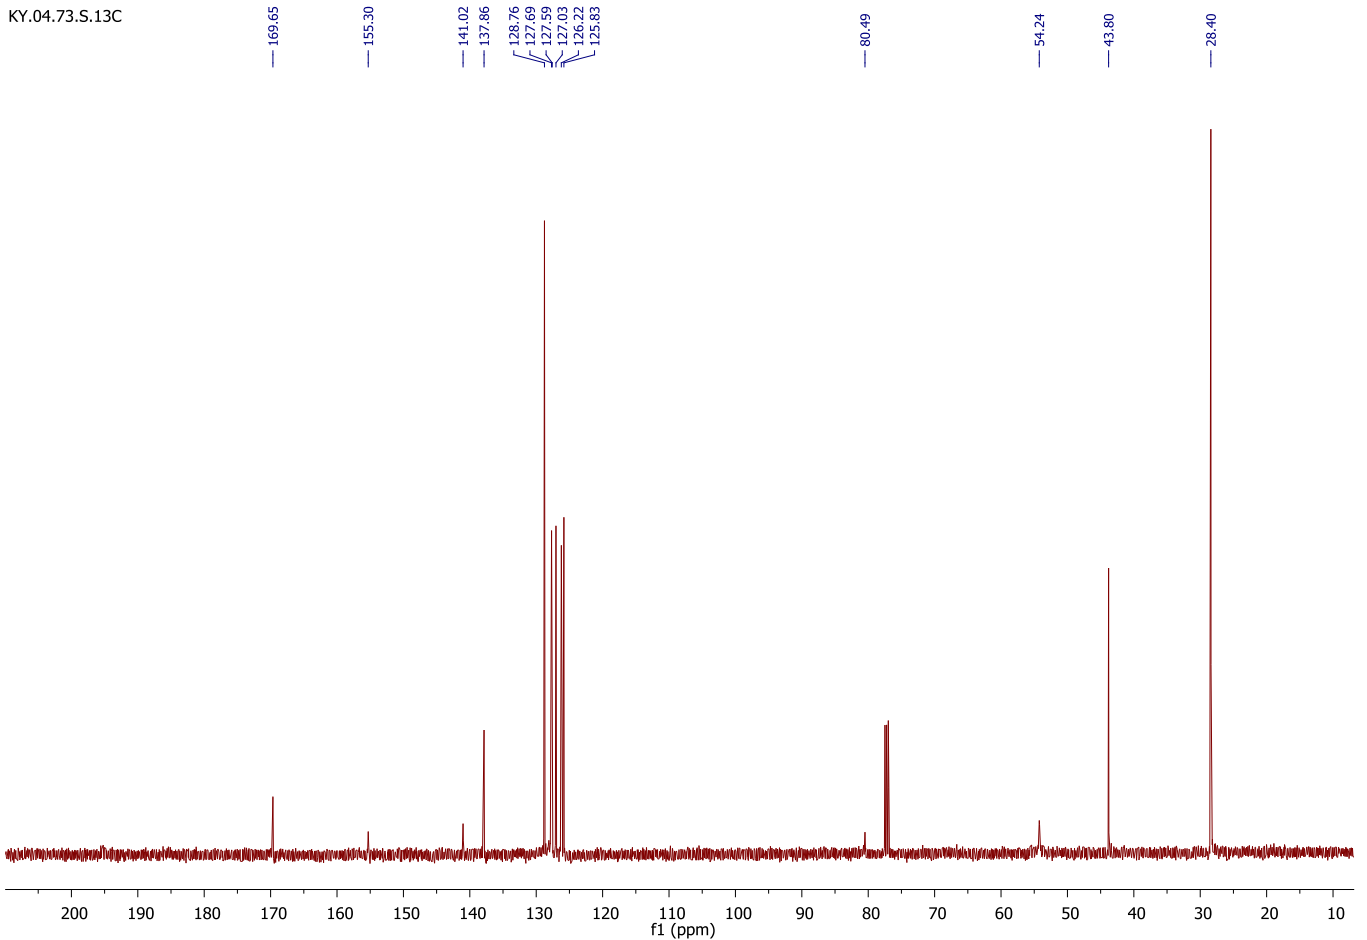

KY.04.88.13B  
7.32  
7.31  
7.29  
7.27  
7.26  
7.25  
7.24  
7.23  
7.22  
7.22  
7.21  
7.20  
7.20  
7.19  
7.18  
7.09  
7.08  
7.03  
7.02  
6.91  
6.90  
6.89  
6.02  
6.01

4.44  
4.42  
4.41  
4.39  
4.39  
4.38  
4.36  
4.35

1.88

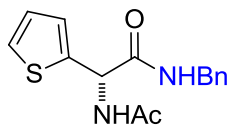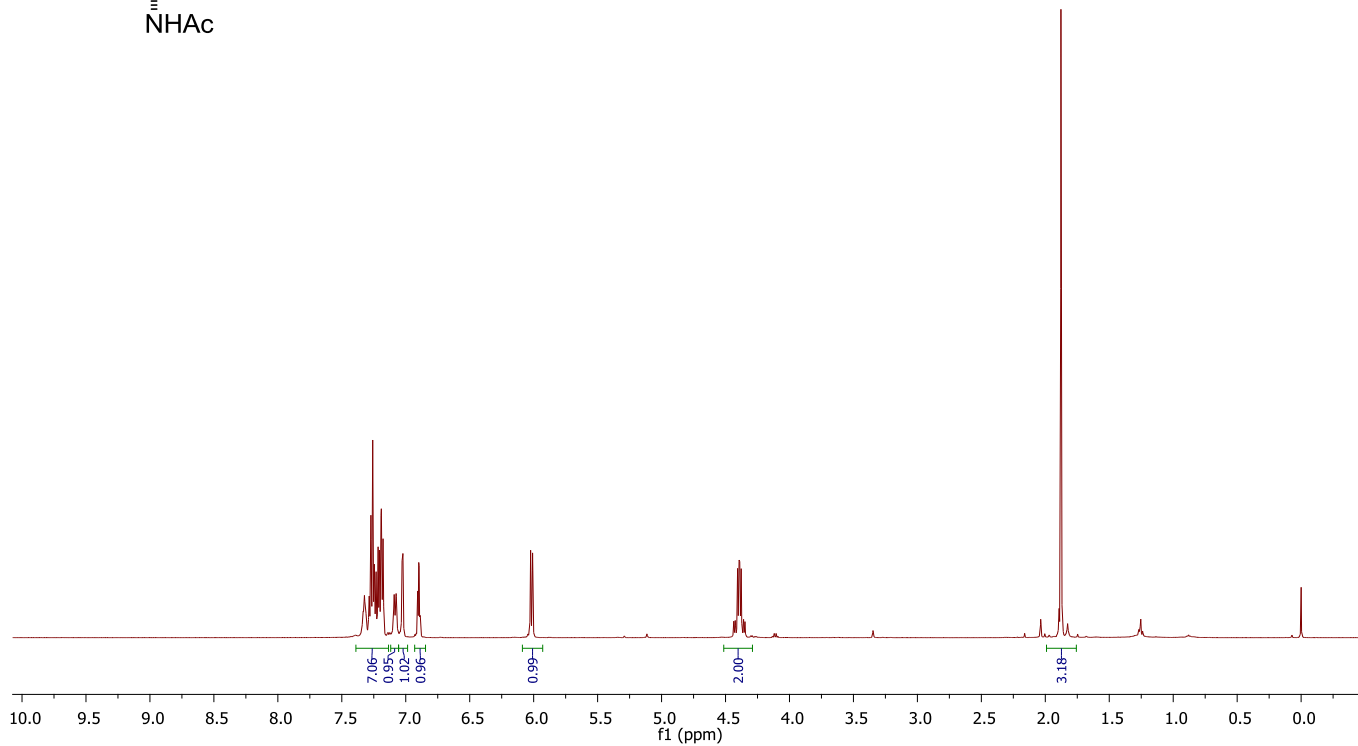

KY.04.88.13C

170.02  
169.53

140.76  
137.71  
128.84  
127.89  
127.71  
127.07  
126.52  
125.86

52.65

44.04

23.11

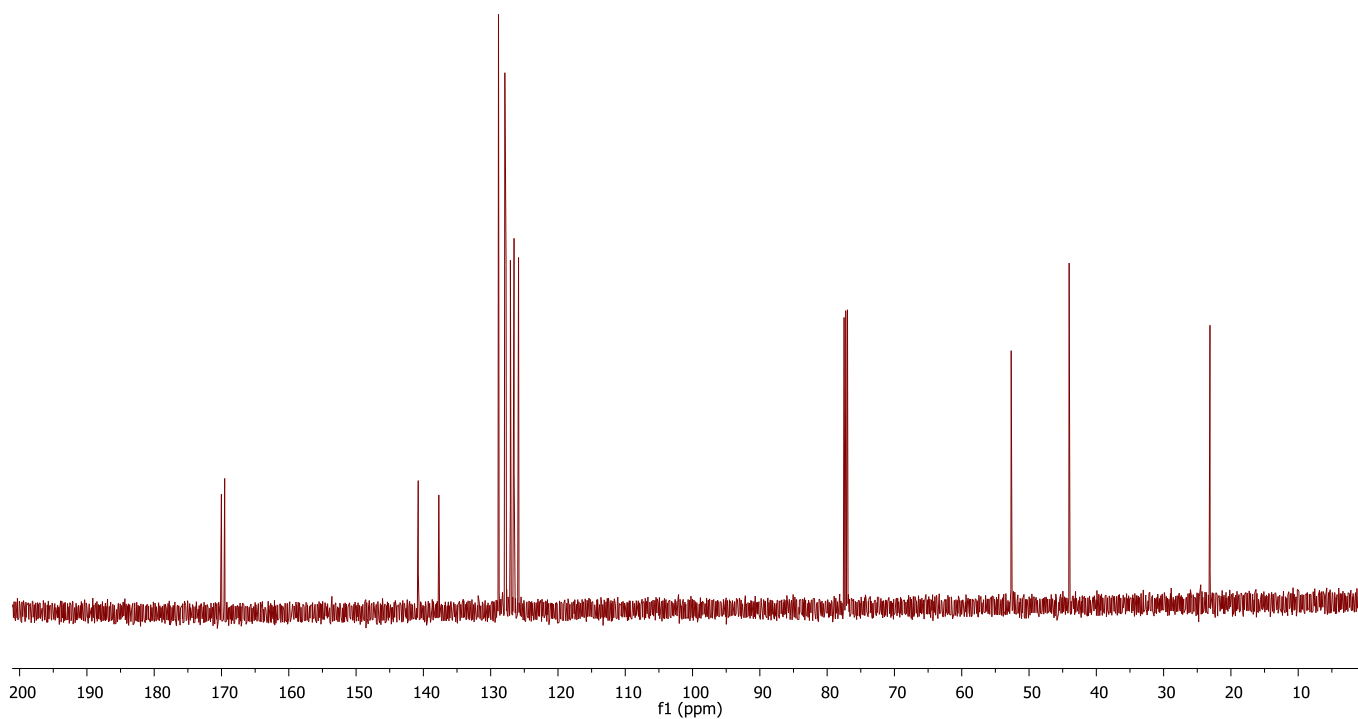

KY.04.82q.gly.1H

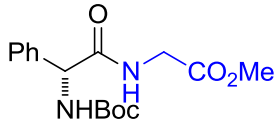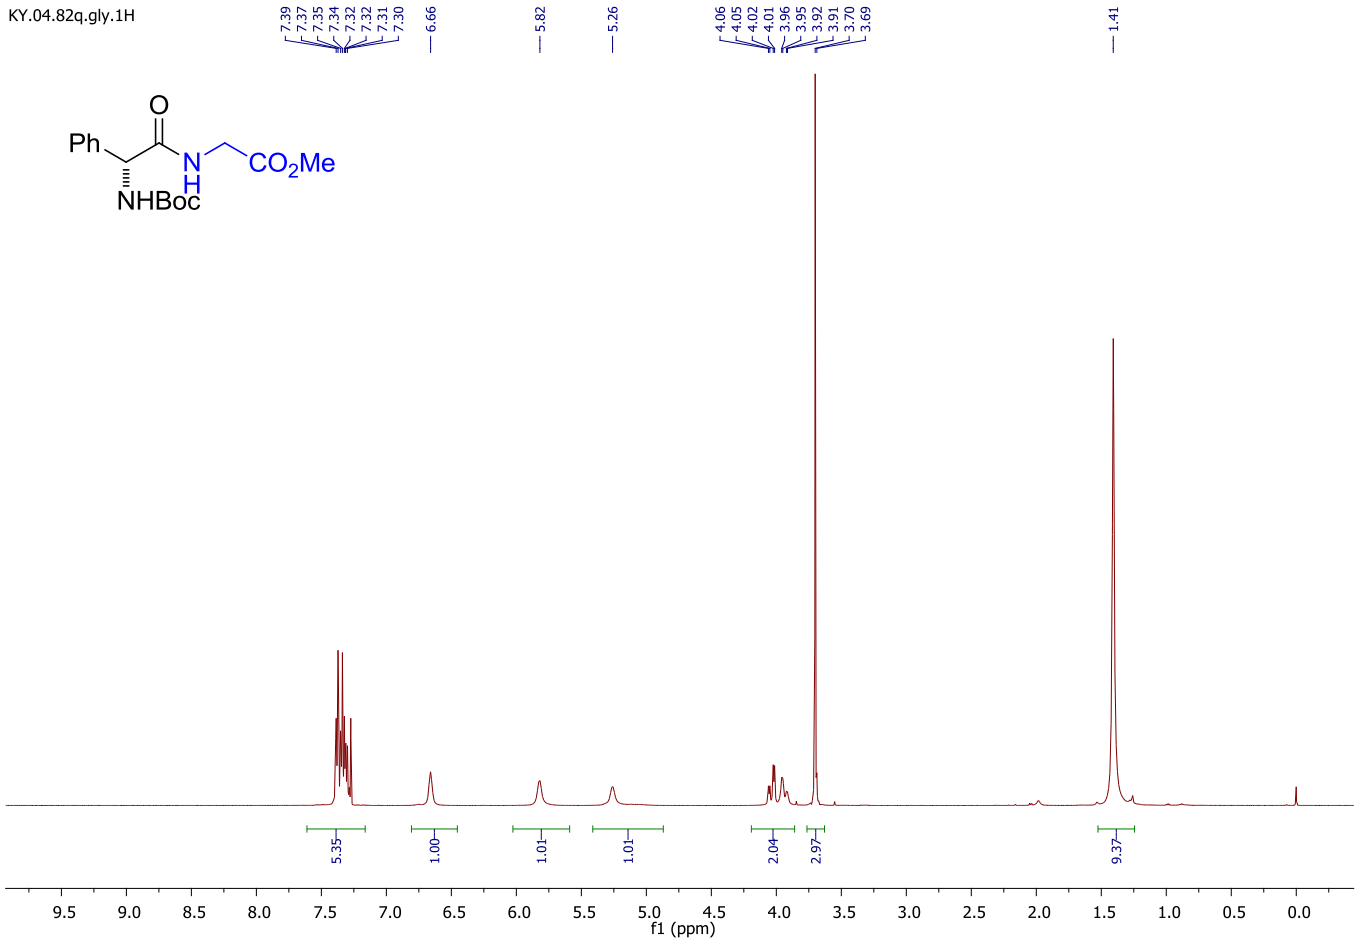

KY.04.82q.gly.13C

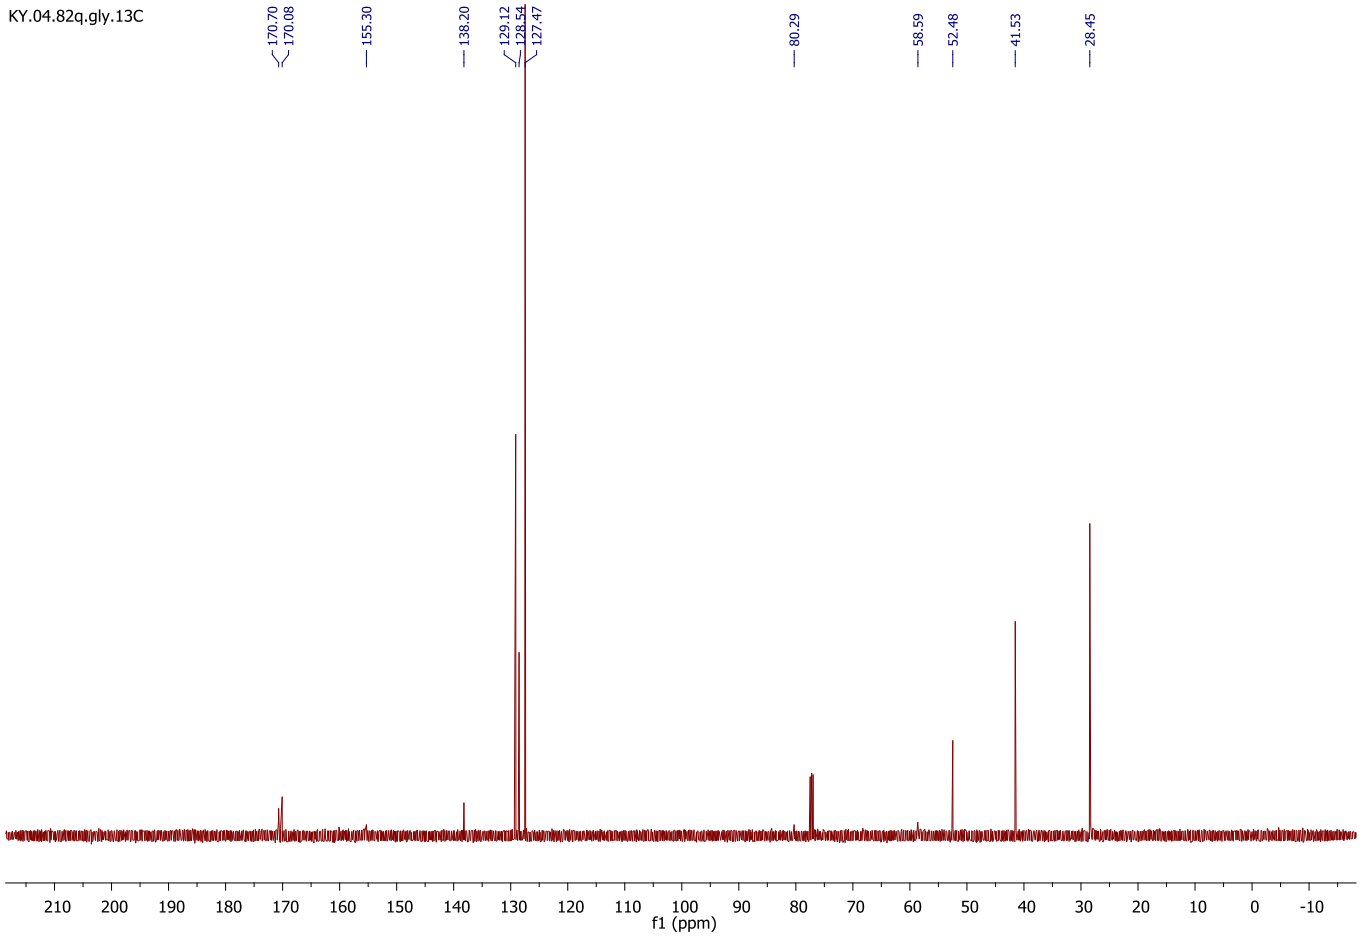



KY.04.99.phen.col

7.37 7.37 7.37 7.36 7.36 7.33 7.32 7.31 7.15 7.14 7.12 7.08 7.06 7.05 6.66 6.65 6.15 5.82 5.13 4.89 4.88 4.87 4.86 4.85 4.18 4.17 4.17 4.16 4.15 4.15 4.14 4.13 4.13 3.02 3.00 2.99 2.98 2.96 2.94 2.93 1.41 1.26 1.25 1.23

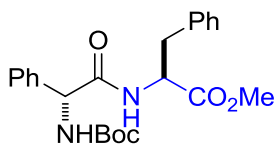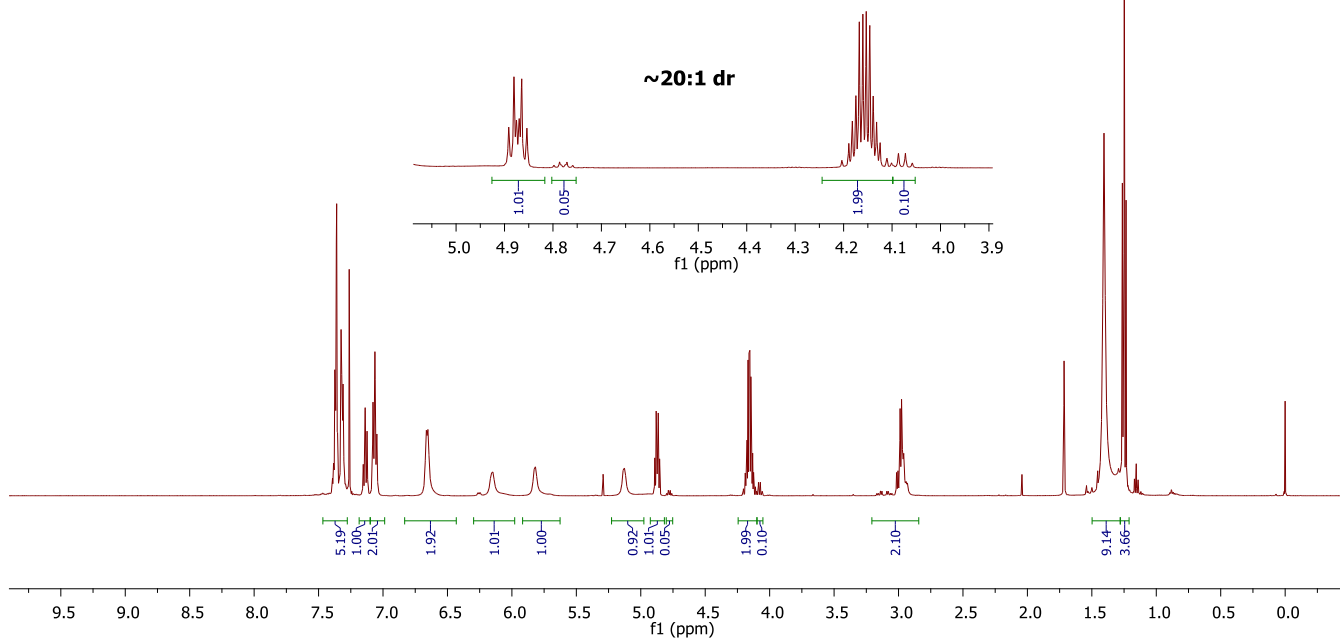

KY.04.99.phen.13C

171.09 169.55 155.18 138.62 135.37 133.37 129.32 128.62 128.58 127.48 127.13 80.21 61.85 58.87 53.27 37.86 28.49 14.30

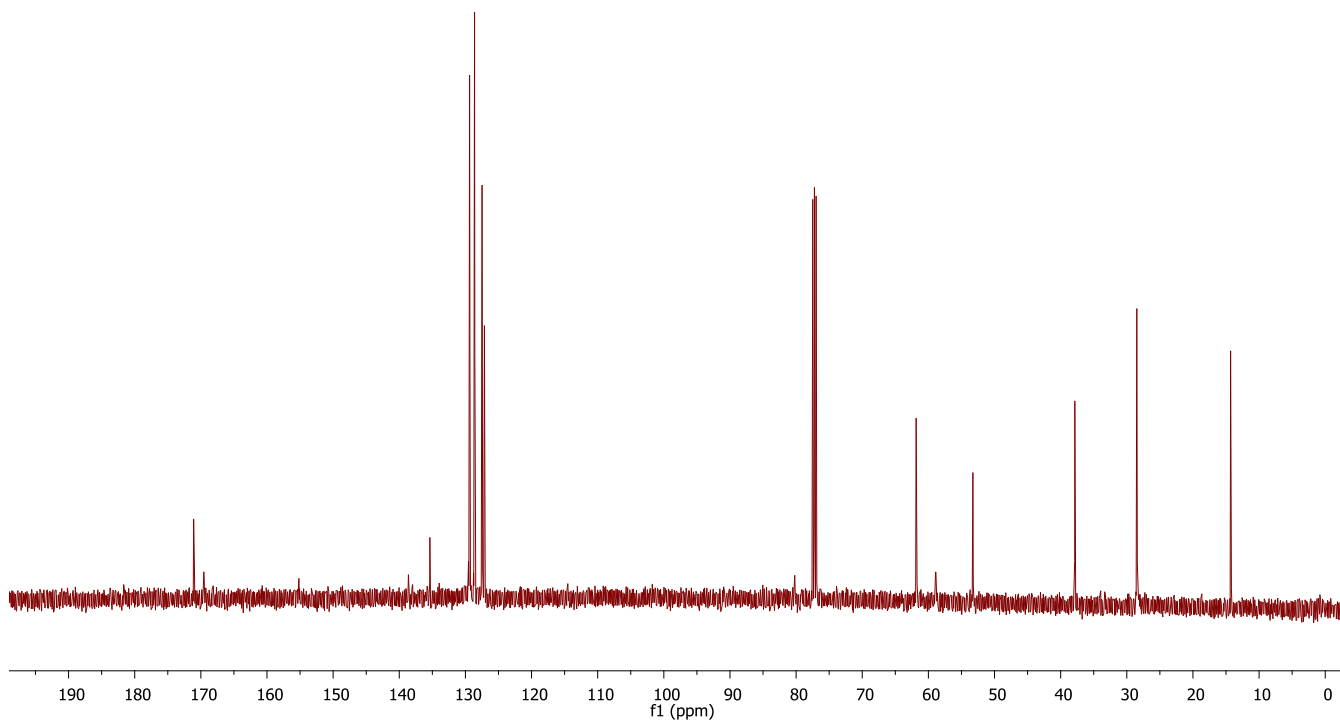

KY.04.76.1H

7.31  
7.30  
7.29  
7.28  
7.27  
7.24  
7.24  
7.23  
6.76

5.25  
5.24  
4.45  
4.43  
4.42  
4.39  
4.38  
4.36  
4.35  
3.98  
3.97  
3.96

1.74  
1.74  
1.73  
1.69  
1.66  
1.63  
1.39  
1.37  
1.25  
1.22  
1.20  
1.12  
1.09  
0.98  
0.96

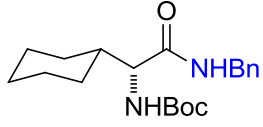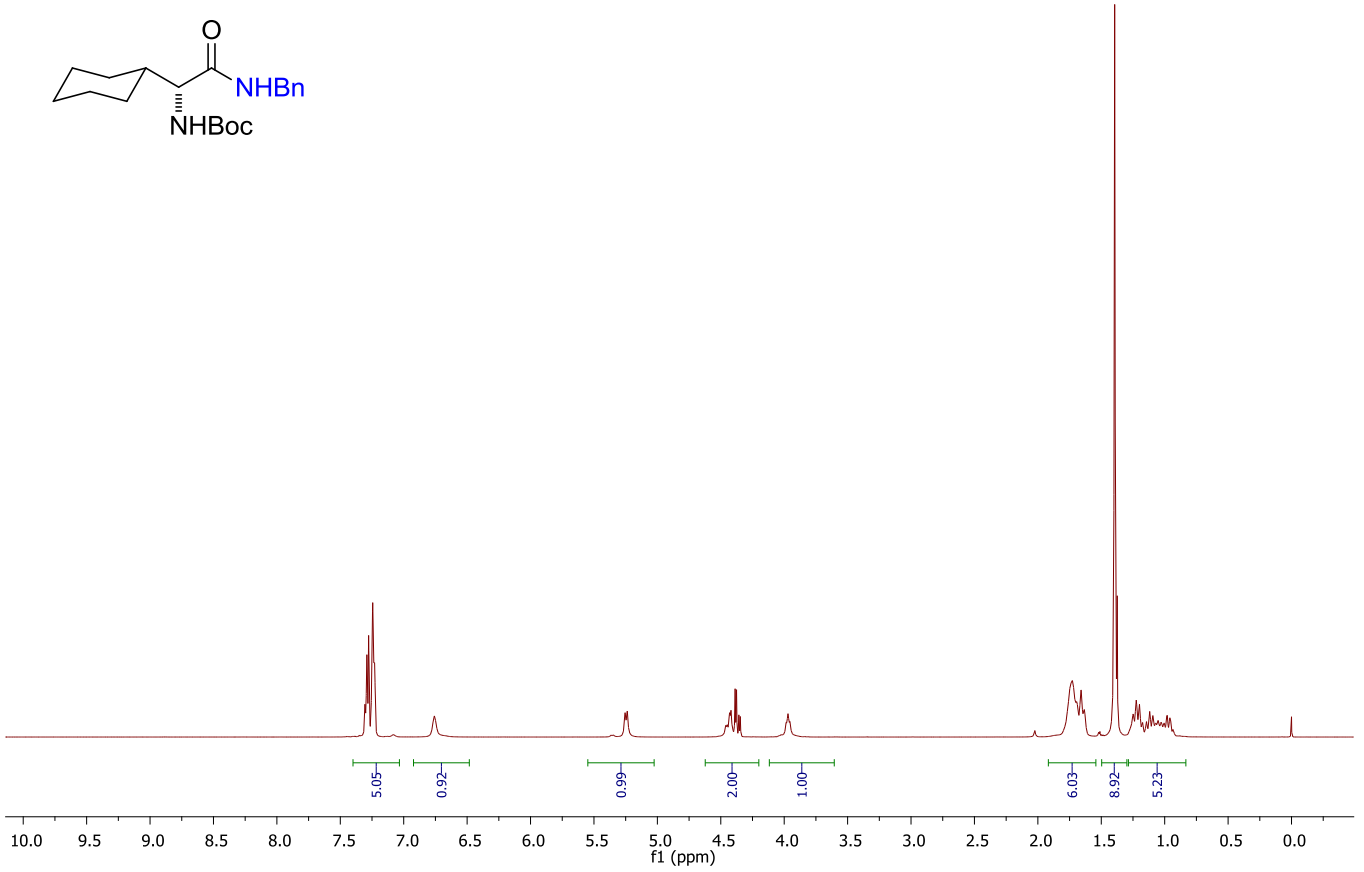

KY.04.76.13C

171.86  
156.11  
138.31  
128.77  
127.81  
127.54  
79.92  
59.85  
43.54  
40.51  
29.95  
28.96  
28.46  
28.31  
26.11

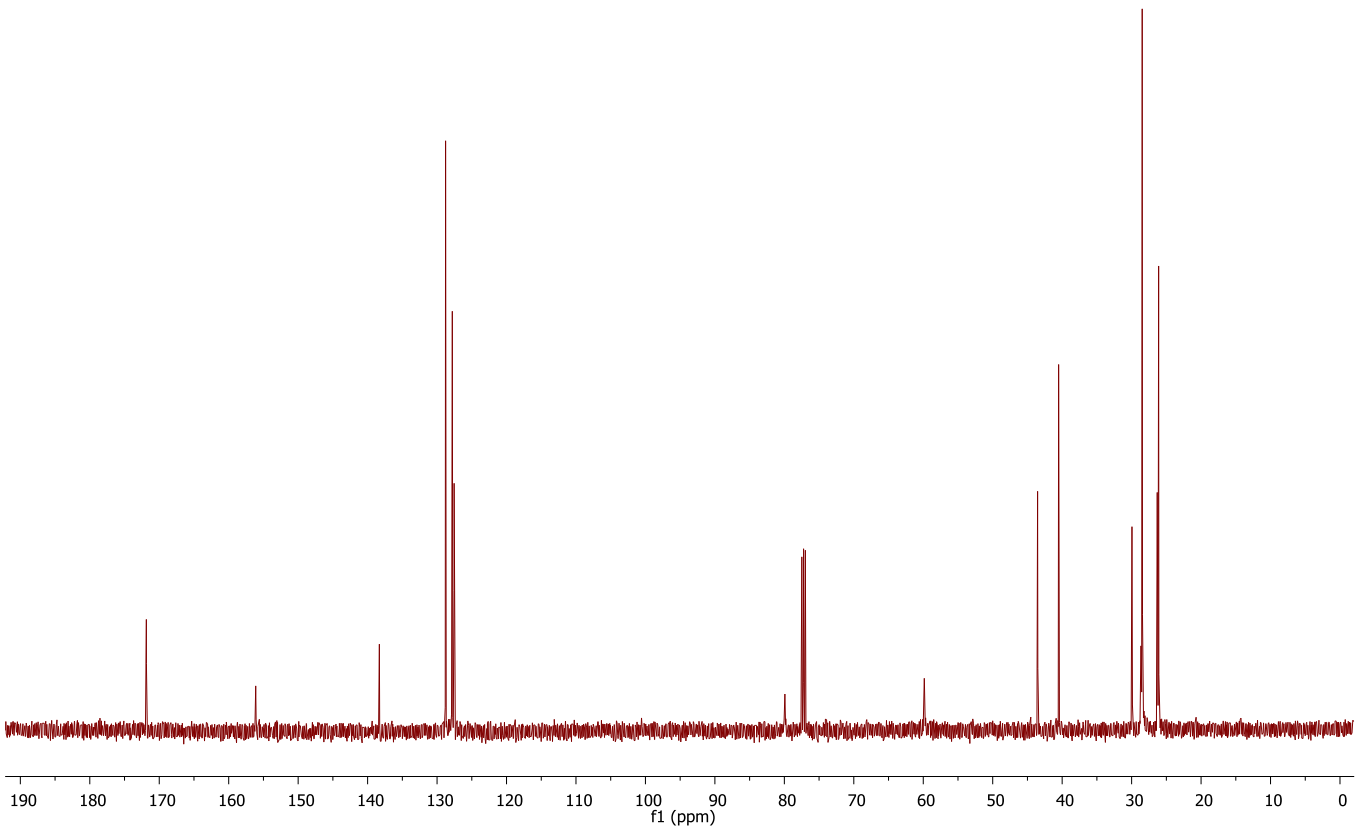

KY.04.92.Cy.Valine.1H

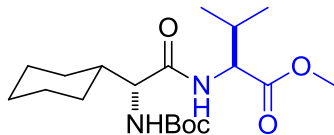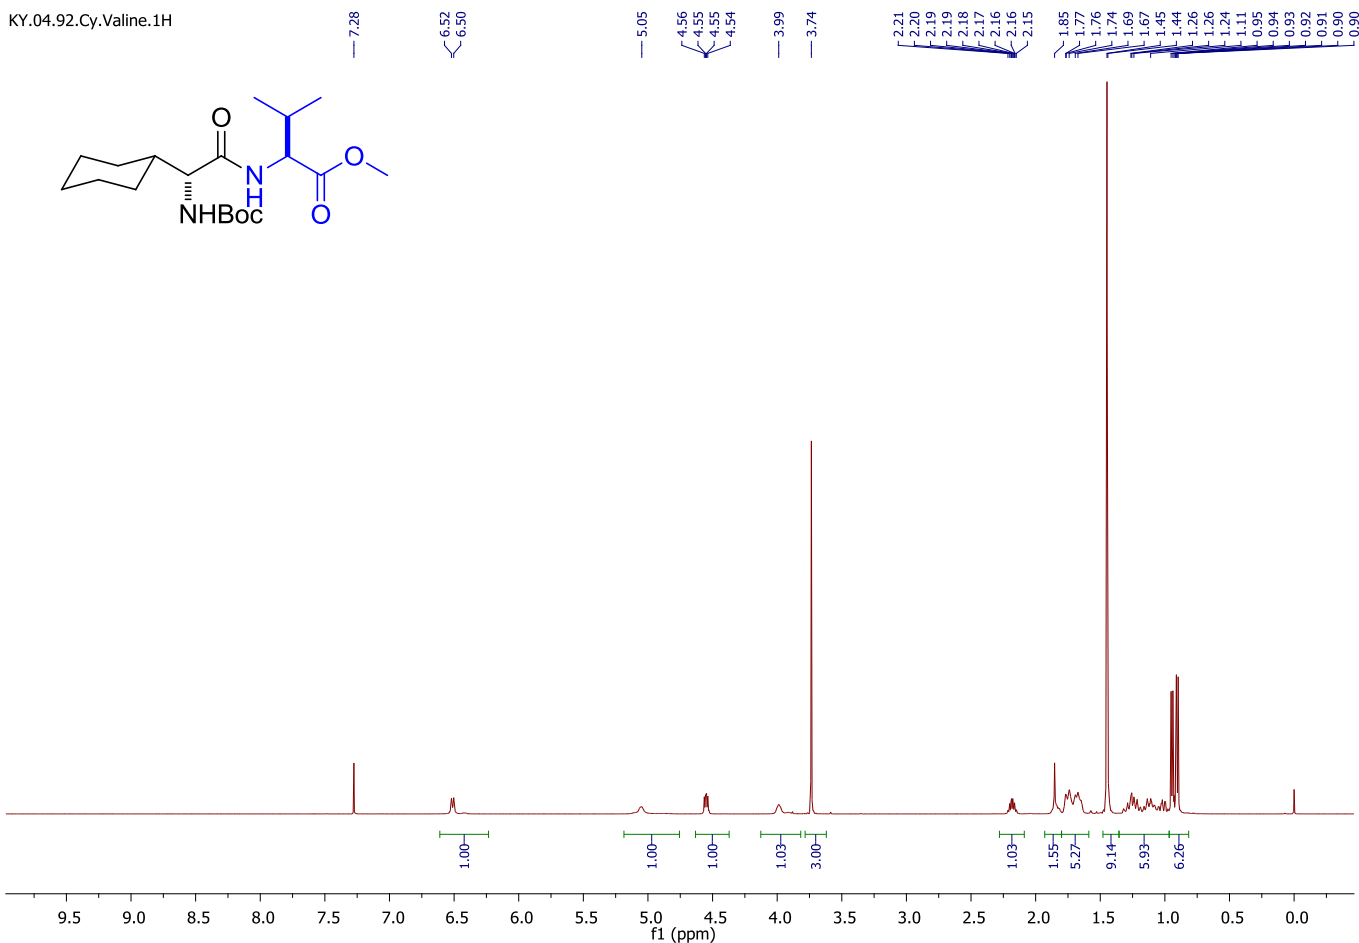

KY.04.92.Cy.Valine.1H.PhH.60d

C6D6 (60 °C)

11:1 dr

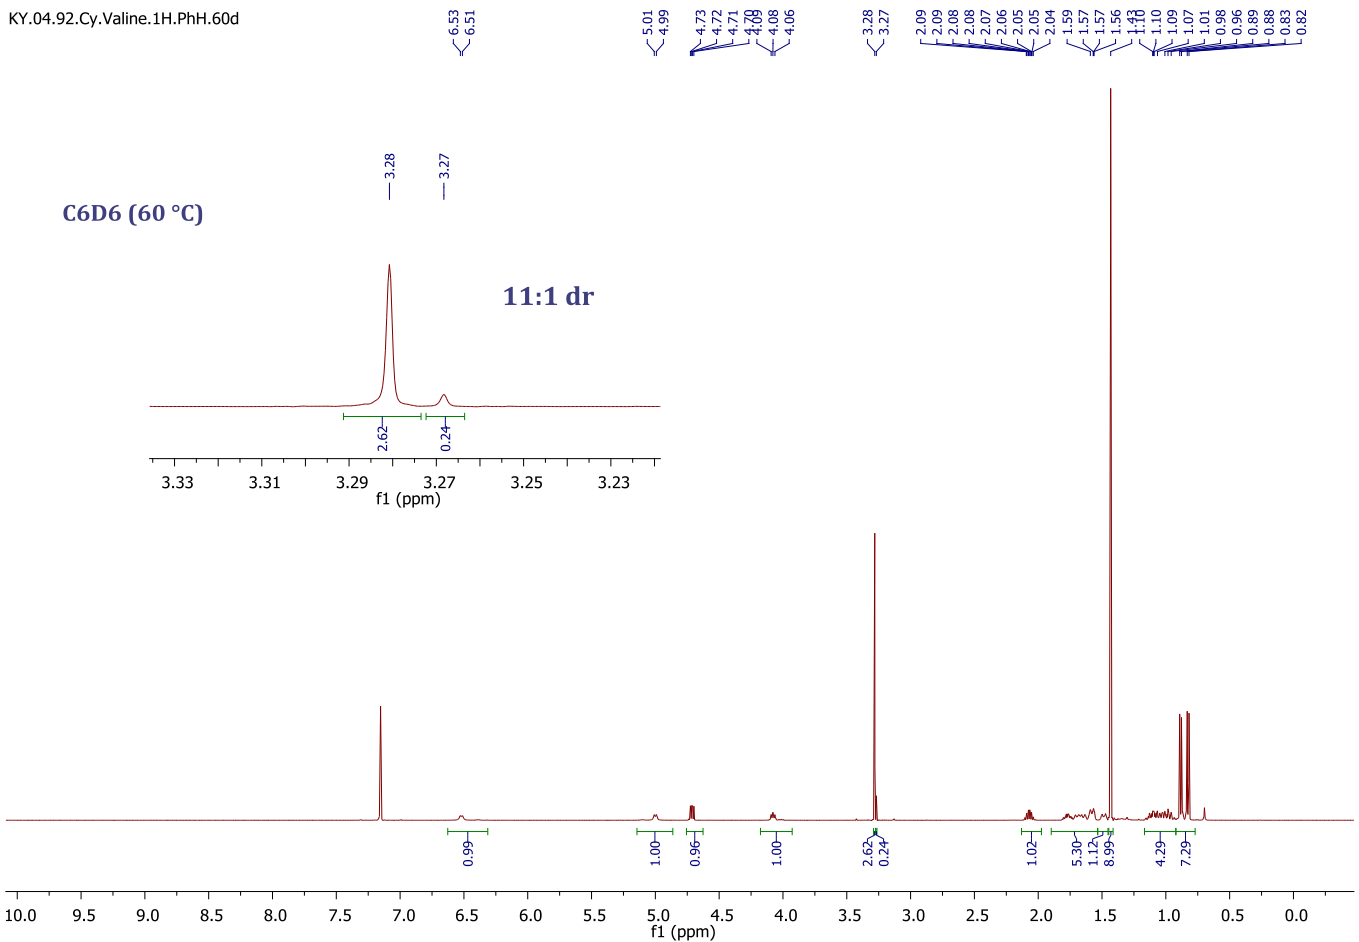



KY.04.92.Cy.Valine.13

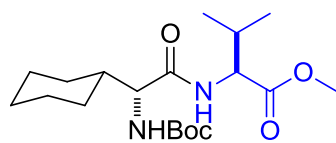

172.99  
171.62

80.14

59.86

57.20

52.33

40.48

31.37

30.05

28.50

28.17

26.29

26.23

26.18

19.16

17.94

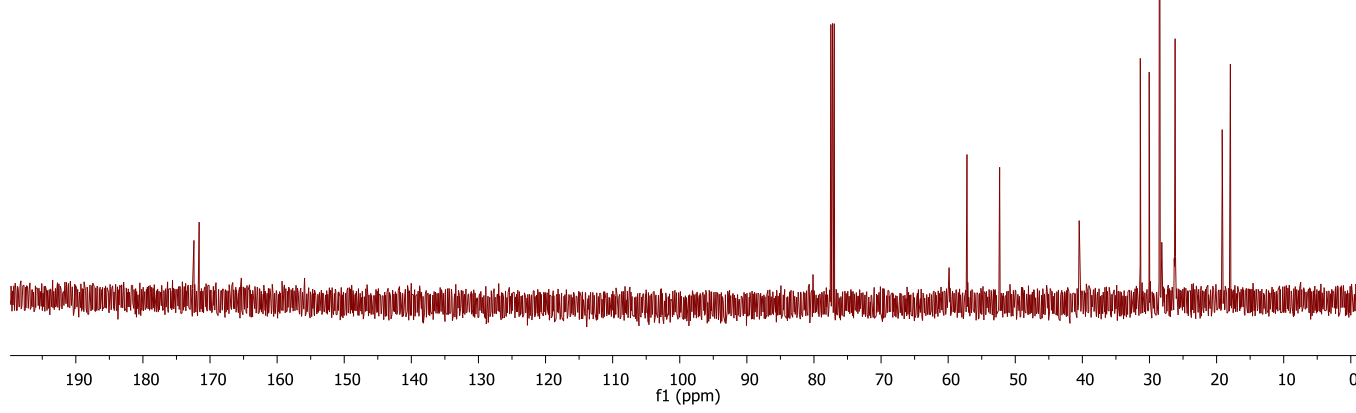

KY.04.116.1H

7.91  
7.86  
7.85  
7.83  
7.82  
7.50  
7.49  
7.49  
7.49  
7.48

6.19  
6.17  
6.03  
6.02  
5.80  
5.79  
5.58  
5.57

4.33  
4.29  
4.04  
4.00  
3.73

3.26  
3.04  
2.95

1.41  
1.39

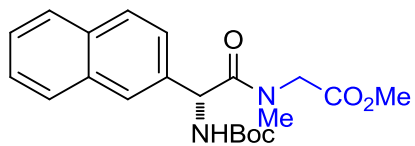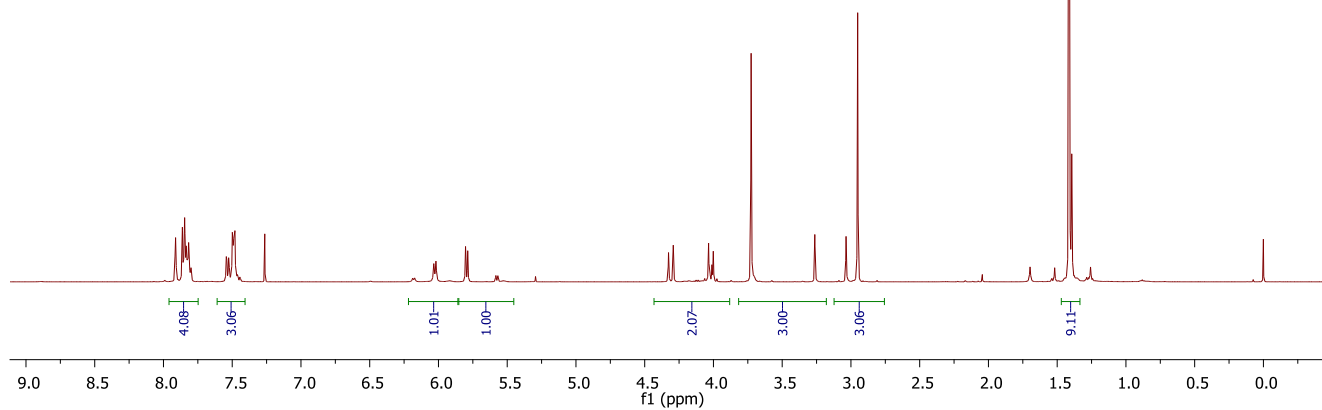

KY.04.116.13C

171.07  
169.35

155.30

134.89  
133.56  
133.29  
128.10  
125.80  
125.80  
125.76  
125.76  
125.59  
125.54  
125.73

80.02

55.62  
52.38  
50.16

36.57

28.56

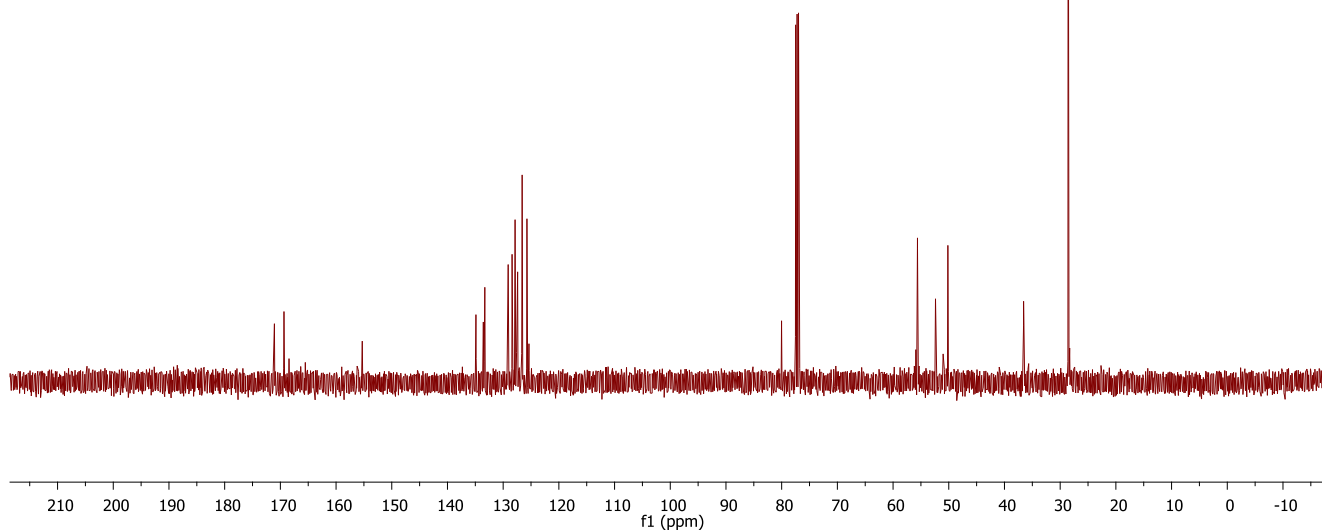

# HPLC Traces of Racemic and Enantioenriched Compounds

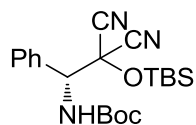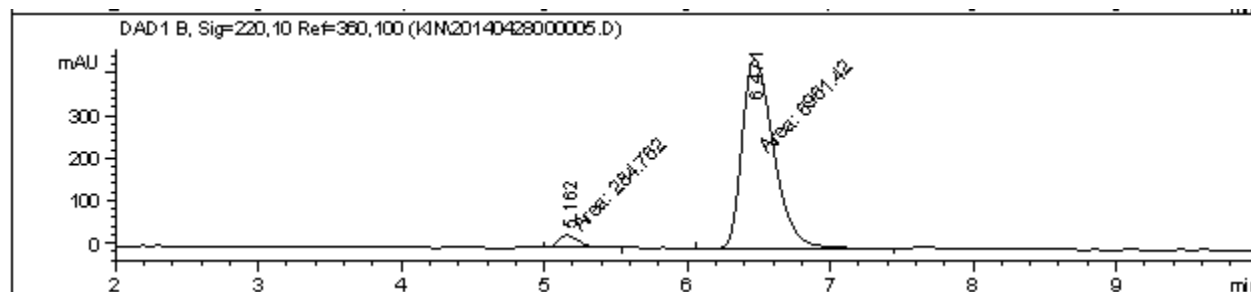

Signal 2: DAD1 B, Sig=220,10 Ref=360,100

| Peak # | RetTime [min] | Type | Width [min] | Area [mAU*s] | Height [mAU] | Area %  |
|--------|---------------|------|-------------|--------------|--------------|---------|
| 1      | 5.162         | MM   | 0.1631      | 284.76154    | 29.10411     | 3.9298  |
| 2      | 6.471         | MM   | 0.2587      | 6961.41895   | 448.50278    | 96.0702 |

Totals : 7246.18048 477.60689

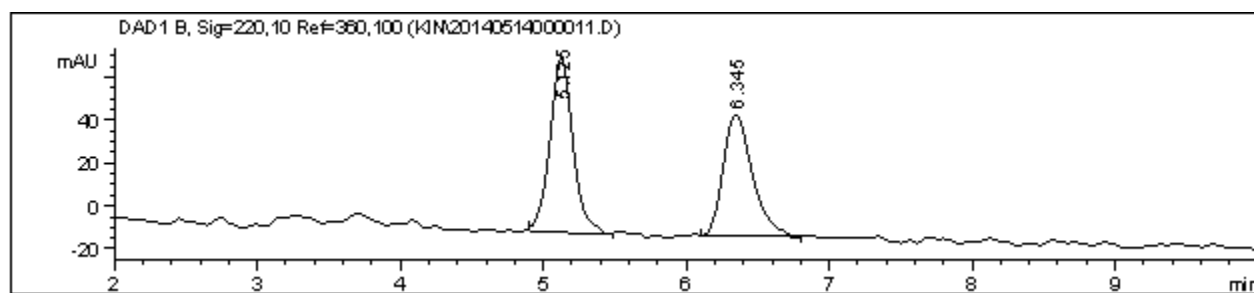

Signal 2: DAD1 B, Sig=220,10 Ref=360,100

| Peak # | RetTime [min] | Type | Width [min] | Area [mAU*s] | Height [mAU] | Area %  |
|--------|---------------|------|-------------|--------------|--------------|---------|
| 1      | 5.125         | BB   | 0.1708      | 917.36328    | 81.82123     | 53.0653 |
| 2      | 6.345         | BB   | 0.2189      | 811.37970    | 56.72670     | 46.9347 |

Totals : 1728.74298 138.54792

Enantiomeric ratio: 96:4  
 Rt<sub>1</sub> = 5.1 min, Rt<sub>2</sub> = 6.4 min  
 Chiracel OD-H, 1% IPA/Hexanes, 1 mL/min

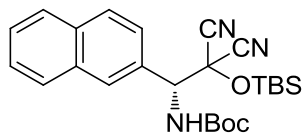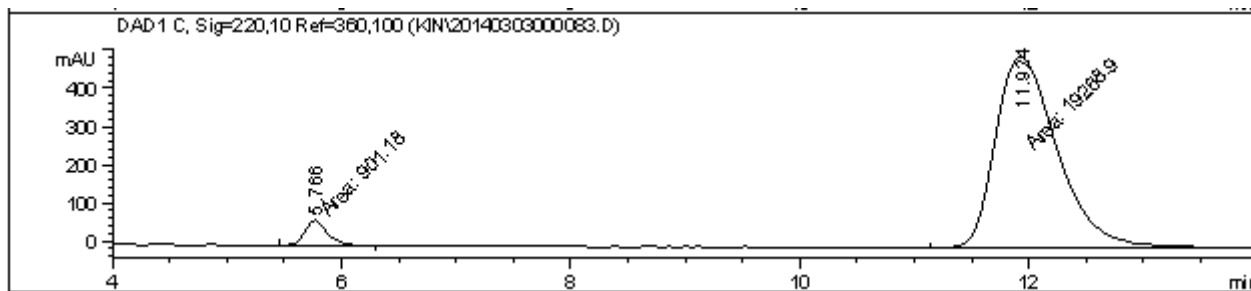

Signal 3: DAD1 C, Sig=220,10 Ref=360,100

| Peak # | RetTime [min] | Type | Width [min] | Area [mAU*s] | Height [mAU] | Area %  |
|--------|---------------|------|-------------|--------------|--------------|---------|
| 1      | 5.766         | MM   | 0.2297      | 901.17969    | 65.39148     | 4.4679  |
| 2      | 11.924        | MM   | 0.6373      | 1.92689e4    | 503.90161    | 95.5321 |

Totals : 2.01701e4 569.29309

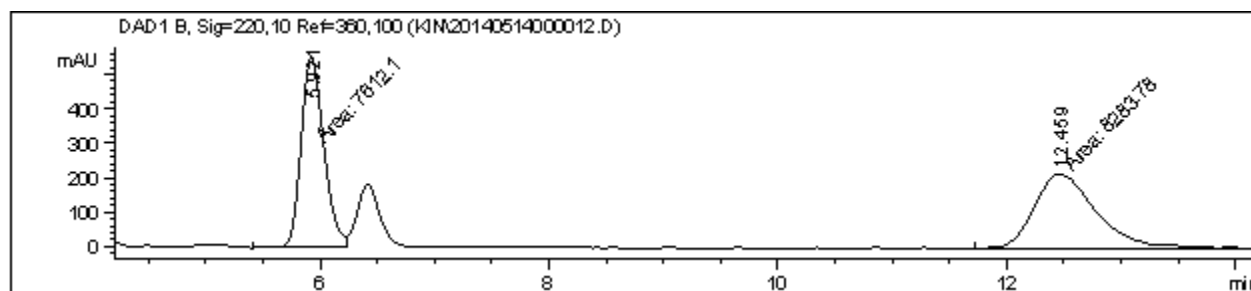

Signal 2: DAD1 B, Sig=220,10 Ref=360,100

| Peak # | RetTime [min] | Type | Width [min] | Area [mAU*s] | Height [mAU] | Area %  |
|--------|---------------|------|-------------|--------------|--------------|---------|
| 1      | 5.921         | MM   | 0.2292      | 7612.09521   | 553.58398    | 47.8872 |
| 2      | 12.459        | MM   | 0.6338      | 8283.77930   | 217.82986    | 52.1128 |

Totals : 1.58959e4 771.41385

Enantiomeric ratio: 95.5:4.5,  
 Rt<sub>1</sub> = 5.7 min, Rt<sub>2</sub> = 11.9 min  
 Chiracel OD-H, 1% IPA/Hexanes, 1 mL/min

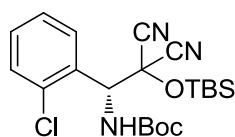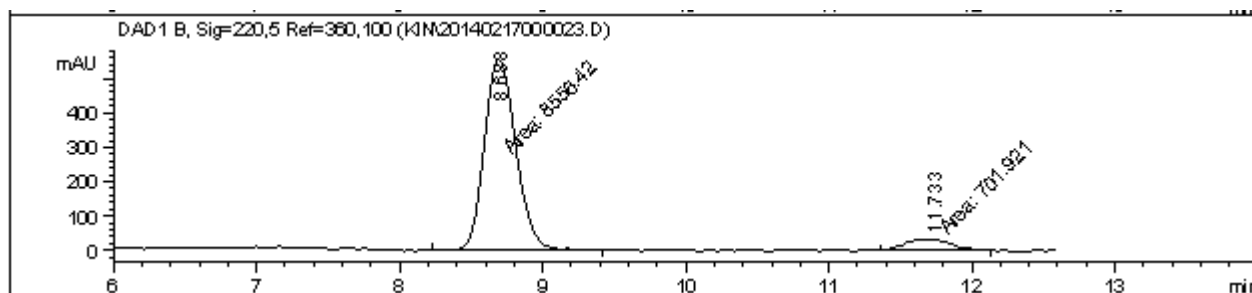

Signal 2: DAD1 B, Sig=220,5 Ref=360,100

| Peak # | RetTime [min] | Type | Width [min] | Area [mAU*s] | Height [mAU] | Area %  |
|--------|---------------|------|-------------|--------------|--------------|---------|
| 1      | 8.688         | MM   | 0.2573      | 8556.41797   | 554.25000    | 92.4185 |
| 2      | 11.733        | MM   | 0.3486      | 701.92084    | 33.56302     | 7.5815  |

Totals : 9258.33881 587.81302

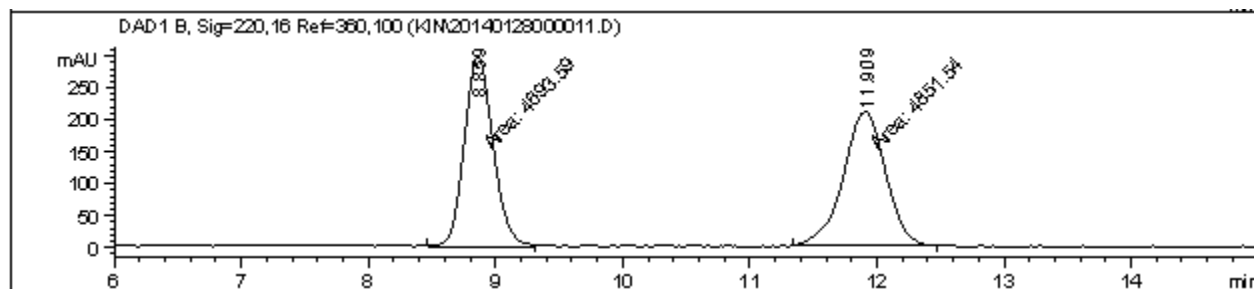

Signal 2: DAD1 B, Sig=220,16 Ref=360,100

| Peak # | RetTime [min] | Type | Width [min] | Area [mAU*s] | Height [mAU] | Area %  |
|--------|---------------|------|-------------|--------------|--------------|---------|
| 1      | 8.859         | MM   | 0.2625      | 4693.59229   | 298.00638    | 49.1726 |
| 2      | 11.909        | MM   | 0.3865      | 4851.54395   | 209.18297    | 50.8274 |

Totals : 9545.13623 507.18935

Enantiomeric ratio: 92.5:7.5  
 Rt<sub>1</sub> = 8.7 min, Rt<sub>2</sub> = 11.7 min  
 Chiralcel AD-H, 2% IPA/Hexanes, 1 mL/min

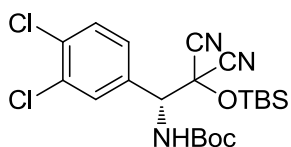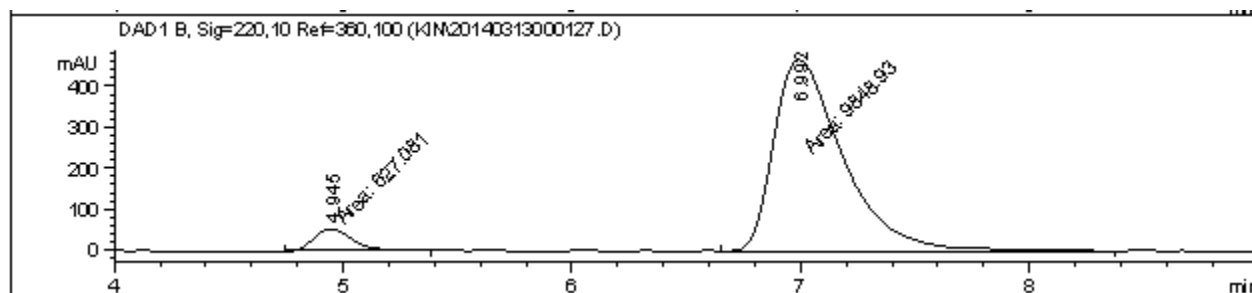

Signal 3: DAD1 C, Sig=225,10 Ref=360,100

| Peak # | RetTime [min] | Type | Width [min] | Area [mAU*s] | Height [mAU] | Area %  |
|--------|---------------|------|-------------|--------------|--------------|---------|
| 1      | 4.947         | MM   | 0.1961      | 629.87152    | 53.53183     | 6.0194  |
| 2      | 6.992         | MM   | 0.3446      | 9834.17578   | 475.57086    | 93.9806 |

Totals : 1.04640e4 529.10269

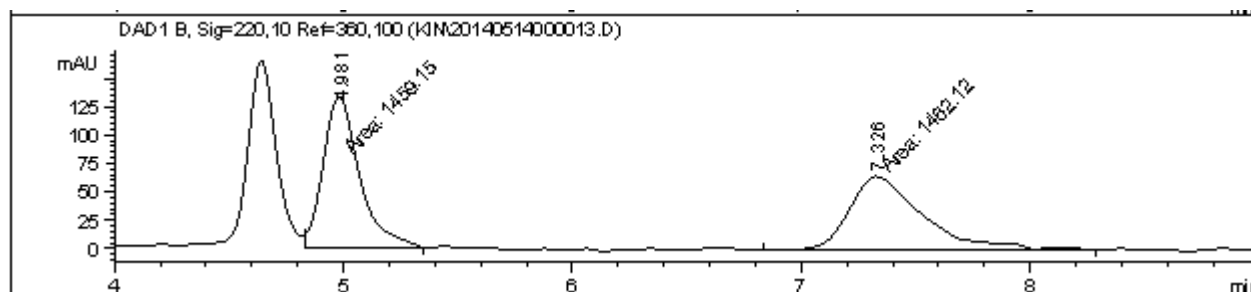

Signal 2: DAD1 B, Sig=220,10 Ref=360,100

| Peak # | RetTime [min] | Type | Width [min] | Area [mAU*s] | Height [mAU] | Area %  |
|--------|---------------|------|-------------|--------------|--------------|---------|
| 1      | 4.981         | MM   | 0.1824      | 1459.14526   | 133.31259    | 49.9491 |
| 2      | 7.326         | MM   | 0.3740      | 1462.11633   | 65.15425     | 50.0509 |

Totals : 2921.26160 198.46684

Enantiomeric ratio: 94:6  
 Rt<sub>1</sub> = 5.0 min, Rt<sub>2</sub> = 7.0 min  
 Chiracel OD-H, 1% IPA/Hexanes, 1 mL/min

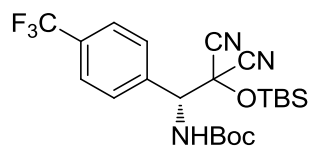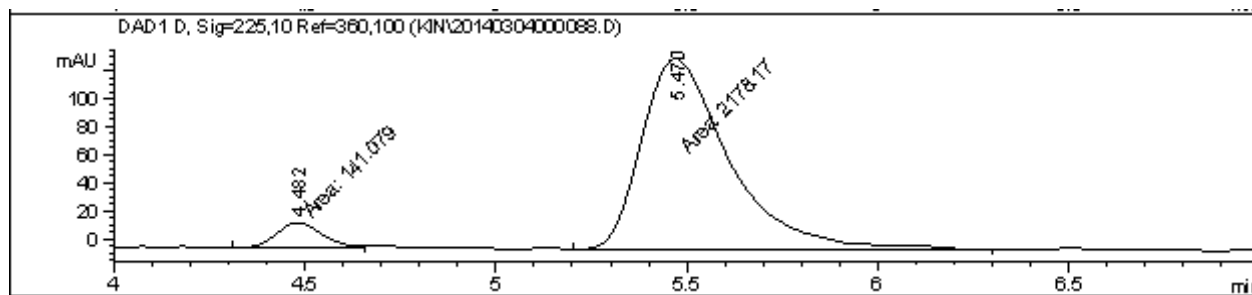

Signal 4: DAD1 D, Sig=225,10 Ref=360,100

| Peak # | RetTime [min] | Type | Width [min] | Area [mAU*s] | Height [mAU] | Area %  |
|--------|---------------|------|-------------|--------------|--------------|---------|
| 1      | 4.482         | MM   | 0.1336      | 141.07899    | 17.59560     | 6.0830  |
| 2      | 5.470         | MM   | 0.2662      | 2178.17212   | 136.39267    | 93.9170 |

Totals : 2319.25111 153.98827

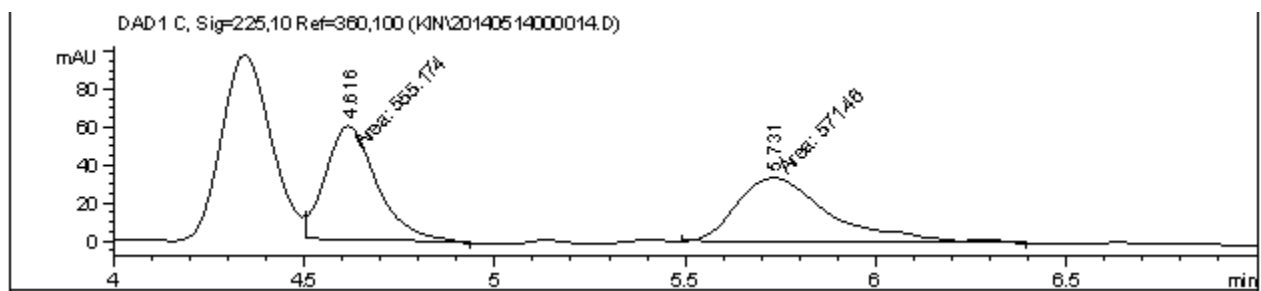

Signal 3: DAD1 C, Sig=225,10 Ref=360,100

| Peak # | RetTime [min] | Type | Width [min] | Area [mAU*s] | Height [mAU] | Area %  |
|--------|---------------|------|-------------|--------------|--------------|---------|
| 1      | 4.616         | MM   | 0.1534      | 555.17401    | 60.33183     | 49.2772 |
| 2      | 5.731         | MM   | 0.2835      | 571.46014    | 33.59464     | 50.7228 |

Totals : 1126.63416 93.92646

Enantiomeric ratio: 94:6  
 Rt<sub>1</sub> = 4.5, Rt<sub>2</sub> = 5.5  
 Chiralcel OD-H, 1% IPA/Hexanes, 1 mL/min

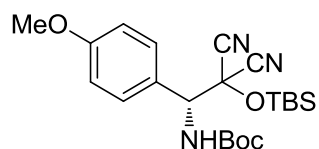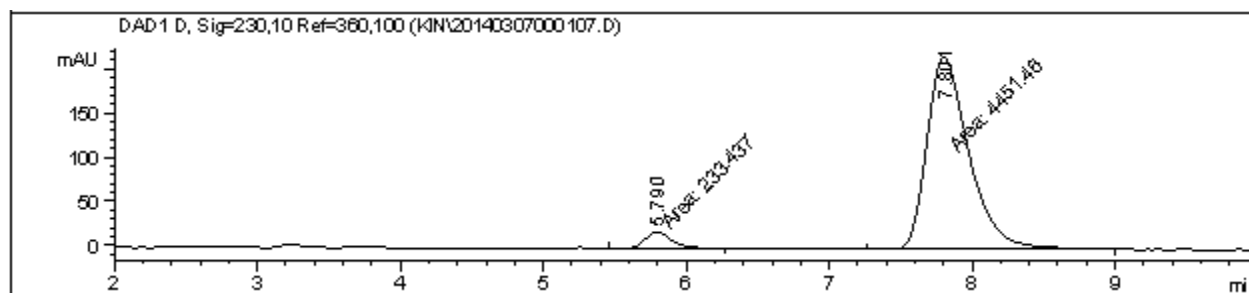

Signal 4: DAD1 D, Sig=230,10 Ref=360,100

| Peak # | RetTime [min] | Type | Width [min] | Area [mAU*s] | Height [mAU] | Area %  |
|--------|---------------|------|-------------|--------------|--------------|---------|
| 1      | 5.790         | MM   | 0.2133      | 233.43719    | 18.24405     | 4.9828  |
| 2      | 7.801         | MM   | 0.3407      | 4451.45947   | 217.73611    | 95.0172 |

Totals : 4684.89667 235.98016

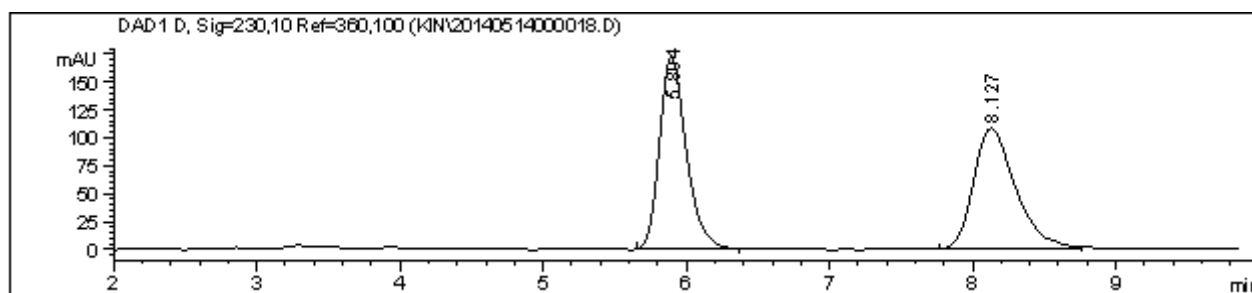

Signal 4: DAD1 D, Sig=230,10 Ref=360,100

| Peak # | RetTime [min] | Type | Width [min] | Area [mAU*s] | Height [mAU] | Area %  |
|--------|---------------|------|-------------|--------------|--------------|---------|
| 1      | 5.894         | BB   | 0.1991      | 2227.16089   | 171.96913    | 50.0732 |
| 2      | 8.127         | BB   | 0.3114      | 2220.64575   | 108.21827    | 49.9268 |

Totals : 4447.80664 280.18740

Enantiomeric ratio: 95:5  
 Rt<sub>1</sub> = 5.8, Rt<sub>2</sub> = 7.8  
 Chiracel OD-H, 1% IPA/Hexanes, 1 mL/min



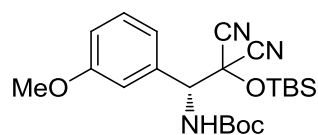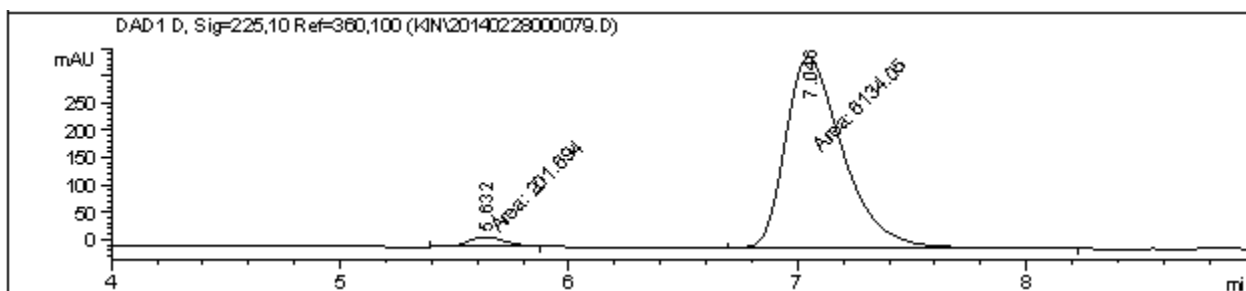

Signal 4: DAD1 D, Sig=225,10 Ref=360,100

| Peak # | RetTime [min] | Type | Width [min] | Area [mAU*s] | Height [mAU] | Area %  |
|--------|---------------|------|-------------|--------------|--------------|---------|
| 1      | 5.632         | MM   | 0.1894      | 201.69406    | 17.74987     | 3.1834  |
| 2      | 7.046         | MM   | 0.2917      | 6134.05225   | 350.48969    | 96.8166 |

Totals : 6335.74631 368.23956

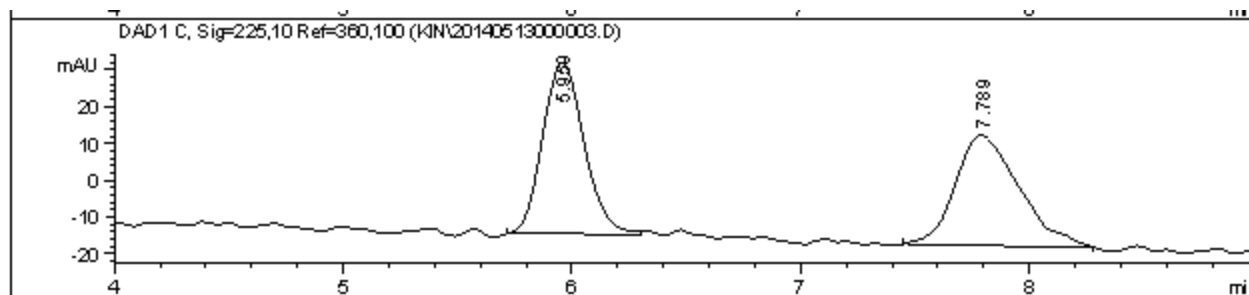

Signal 3: DAD1 C, Sig=225,10 Ref=360,100

| Peak # | RetTime [min] | Type | Width [min] | Area [mAU*s] | Height [mAU] | Area %  |
|--------|---------------|------|-------------|--------------|--------------|---------|
| 1      | 5.959         | BB   | 0.1948      | 586.71973    | 46.61628     | 50.1872 |
| 2      | 7.789         | BB   | 0.2851      | 582.34247    | 30.18557     | 49.8128 |

Totals : 1169.06219 76.80185

Enantiomeric ratio: 97:3  
 Rt<sub>1</sub> = 5.6, Rt<sub>2</sub> = 7.0  
 Chiracel OD-H, 1% IPA/Hexanes, 1 mL/min

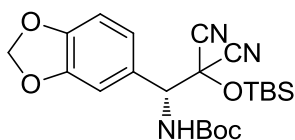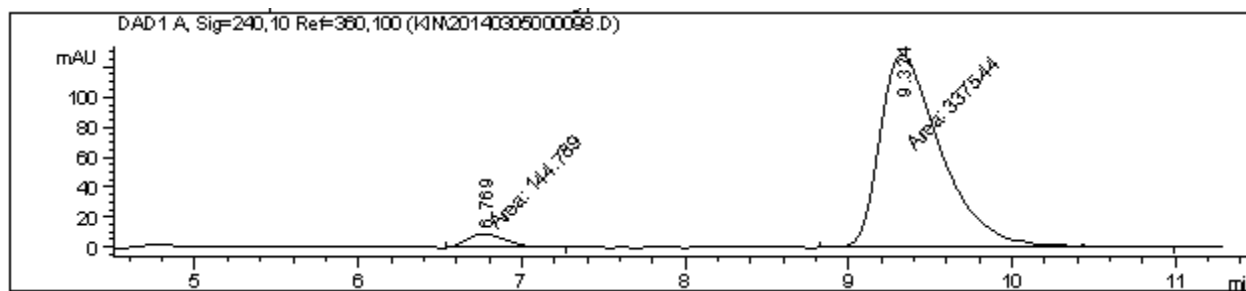

Signal 1: DAD1 A, Sig=240,10 Ref=360,100

| Peak # | RetTime [min] | Type | Width [min] | Area [mAU*s] | Height [mAU] | Area %  |
|--------|---------------|------|-------------|--------------|--------------|---------|
| 1      | 6.769         | MM   | 0.2672      | 144.78928    | 9.03069      | 4.1131  |
| 2      | 9.324         | MM   | 0.4378      | 3375.43799   | 128.48534    | 95.8869 |

Totals : 3520.22726 137.51602

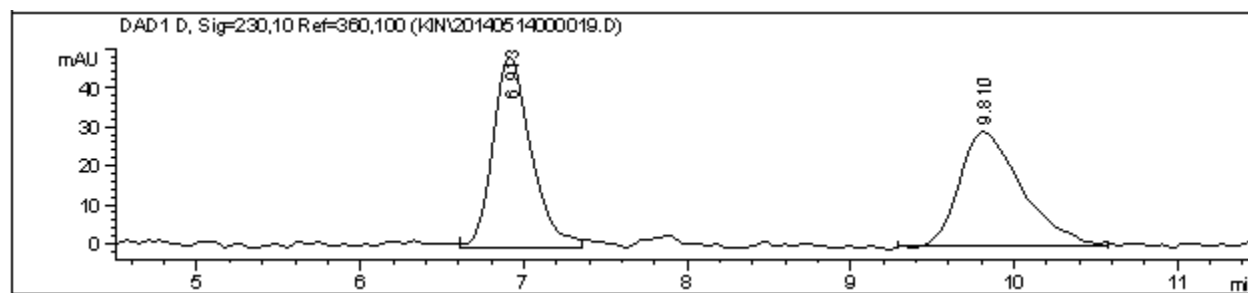

Signal 4: DAD1 D, Sig=230,10 Ref=360,100

| Peak # | RetTime [min] | Type | Width [min] | Area [mAU*s] | Height [mAU] | Area %  |
|--------|---------------|------|-------------|--------------|--------------|---------|
| 1      | 6.913         | BB   | 0.2498      | 793.47815    | 48.76608     | 50.2971 |
| 2      | 9.810         | BB   | 0.3831      | 784.10358    | 29.40558     | 49.7029 |

Totals : 1577.58173 78.17166

Enantiomeric ratio: 96:4  
 Rt<sub>1</sub> = 6.7, Rt<sub>2</sub> = 9.3  
 Chiracel OD-H, 1% IPA/Hexanes, 1 mL/min





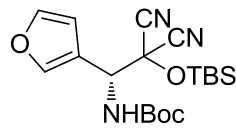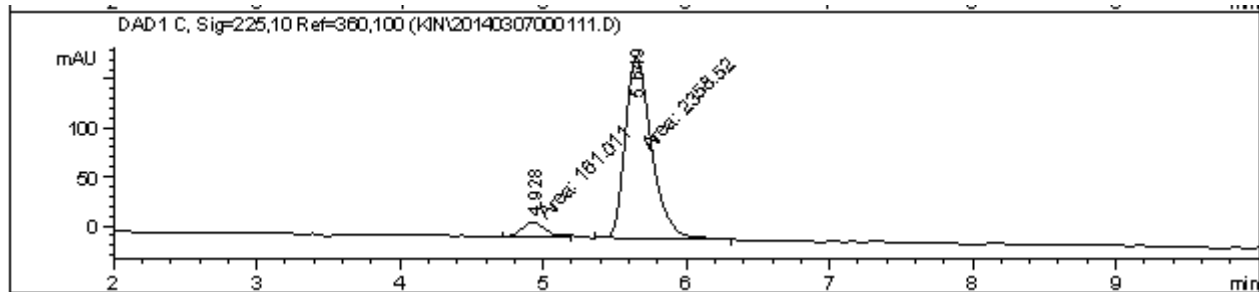

Signal 3: DAD1 C, Sig=225,10 Ref=360,100

| Peak # | RetTime [min] | Type | Width [min] | Area [mAU*s] | Height [mAU] | Area %  |
|--------|---------------|------|-------------|--------------|--------------|---------|
| 1      | 4.928         | MM   | 0.1913      | 161.01129    | 14.02466     | 6.3905  |
| 2      | 5.649         | MM   | 0.2114      | 2358.51953   | 185.94507    | 93.6095 |

Totals : 2519.53082 199.96972

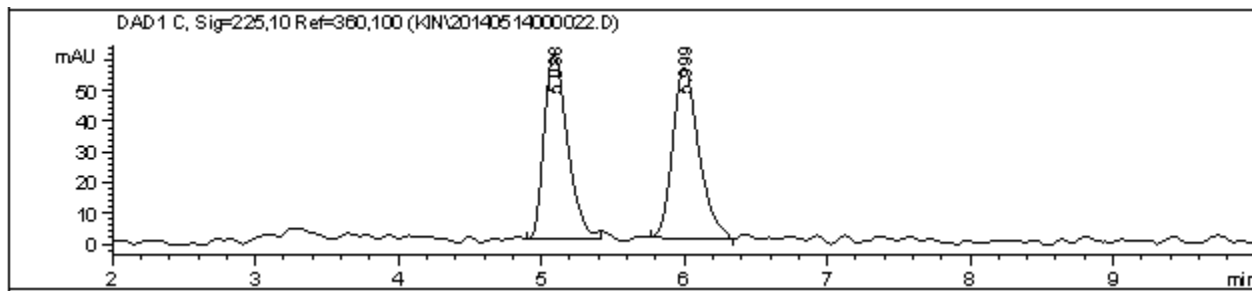

Signal 3: DAD1 C, Sig=225,10 Ref=360,100

| Peak # | RetTime [min] | Type | Width [min] | Area [mAU*s] | Height [mAU] | Area %  |
|--------|---------------|------|-------------|--------------|--------------|---------|
| 1      | 5.088         | BB   | 0.1730      | 694.02582    | 60.85961     | 49.3408 |
| 2      | 5.999         | BV   | 0.1932      | 712.57019    | 55.72057     | 50.6592 |

Totals : 1406.59601 116.58018

Enantiomeric ratio: 93.5:6.5  
 Rt<sub>1</sub> = 5.0, Rt<sub>2</sub> = 5.7  
 Chiracel OD-H, 1% IPA/Hexanes, 1 mL/min



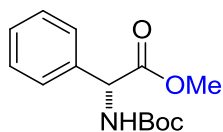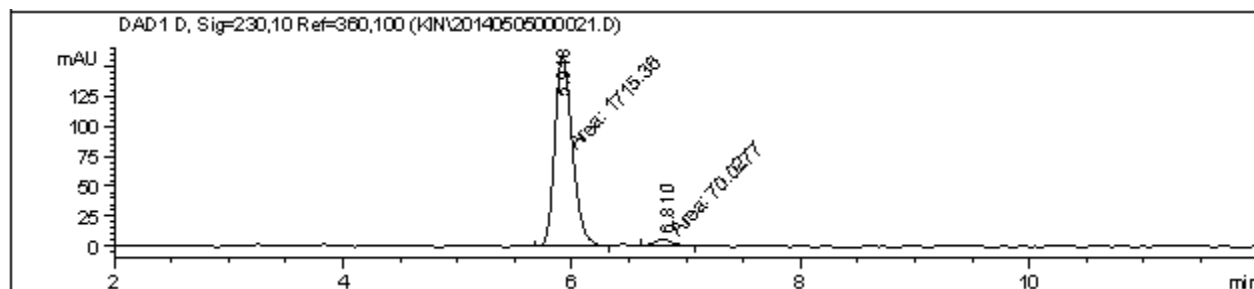

Signal 4: DAD1 D, Sig=230,10 Ref=360,100

| Peak # | RetTime [min] | Type | Width [min] | Area [mAU*s] | Height [mAU] | Area %  |
|--------|---------------|------|-------------|--------------|--------------|---------|
| 1      | 5.918         | MM   | 0.1782      | 1715.36487   | 160.45755    | 96.0777 |
| 2      | 6.810         | MM   | 0.1977      | 70.02773     | 5.90485      | 3.9223  |

Totals : 1785.39260 166.36240

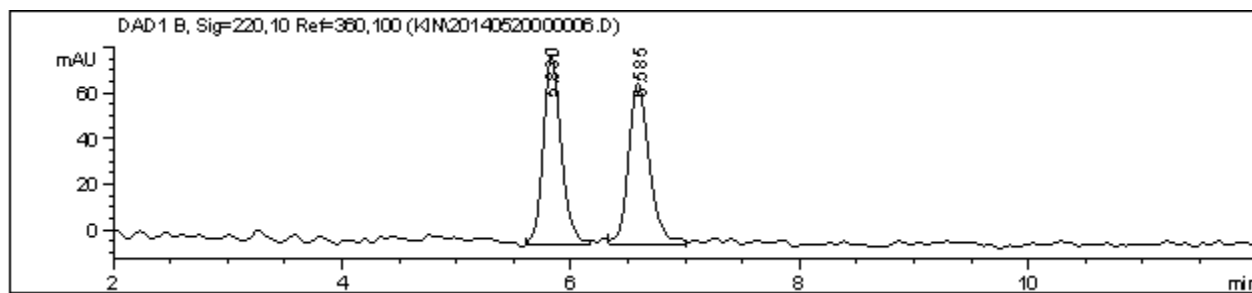

Signal 2: DAD1 B, Sig=220,10 Ref=360,100

| Peak # | RetTime [min] | Type | Width [min] | Area [mAU*s] | Height [mAU] | Area %  |
|--------|---------------|------|-------------|--------------|--------------|---------|
| 1      | 5.830         | BB   | 0.1677      | 909.79297    | 83.08879     | 50.0507 |
| 2      | 6.585         | BB   | 0.1975      | 907.94800    | 70.83281     | 49.9493 |

Totals : 1817.74097 153.92160

Enantiomeric ratio: 96:4  
 Rt<sub>1</sub> = 5.9, Rt<sub>2</sub> = 6.8  
 Chiracel OD-H, 4% IPA/Hexanes, 1 mL/min

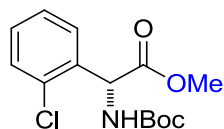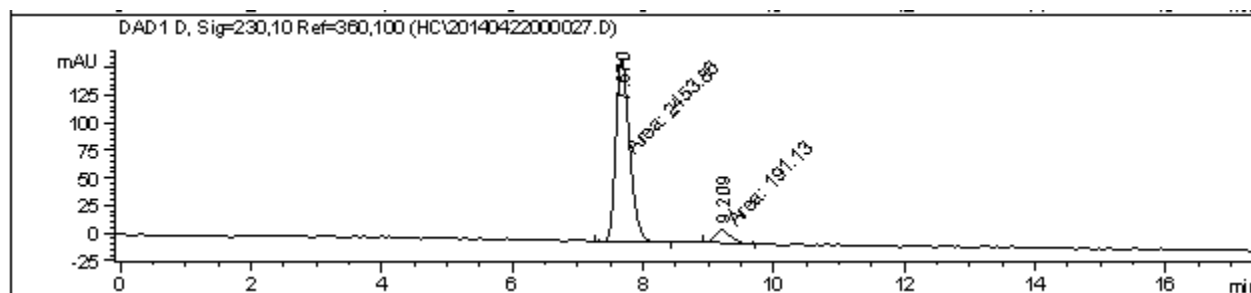

Signal 4: DAD1 D, Sig=230,10 Ref=360,100

| Peak # | RetTime [min] | Type | Width [min] | Area [mAU*s] | Height [mAU] | Area %  |
|--------|---------------|------|-------------|--------------|--------------|---------|
| 1      | 7.670         | MM   | 0.2459      | 2453.85718   | 166.30014    | 92.7739 |
| 2      | 9.209         | MM   | 0.2748      | 191.13040    | 11.59078     | 7.2261  |

Totals : 2644.98758 177.89092

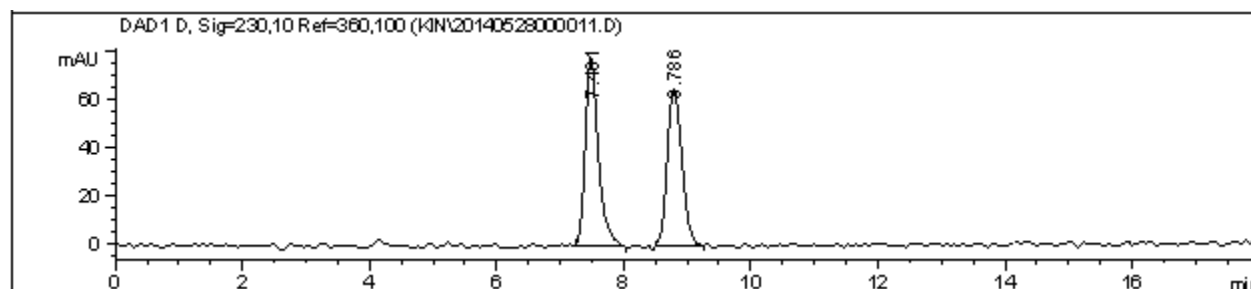

Signal 4: DAD1 D, Sig=230,10 Ref=360,100

| Peak # | RetTime [min] | Type | Width [min] | Area [mAU*s] | Height [mAU] | Area %  |
|--------|---------------|------|-------------|--------------|--------------|---------|
| 1      | 7.481         | BB   | 0.2148      | 1126.63782   | 78.78534     | 51.4616 |
| 2      | 8.786         | BB   | 0.2620      | 1062.64001   | 65.23598     | 48.5384 |

Totals : 2189.27783 144.02132

Enantiomeric ratio: 92.5:7.5  
 Rt<sub>1</sub> = 7.7, Rt<sub>2</sub> = 9.2  
 Chiracel OD-H, 3% IPA/Hexanes, 1 mL/min



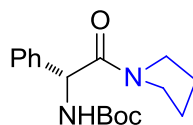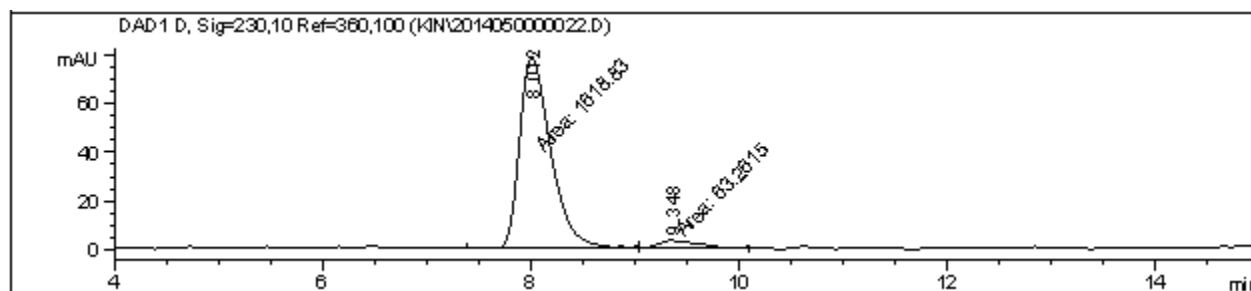

Signal 2: DAD1 B, Sig=220,10 Ref=360,100

| Peak # | RetTime [min] | Type | Width [min] | Area [mAU*s] | Height [mAU] | Area %  |
|--------|---------------|------|-------------|--------------|--------------|---------|
| 1      | 8.012         | MM   | 0.3476      | 5512.33447   | 264.30740    | 96.0273 |
| 2      | 9.405         | MM   | 0.3896      | 228.04552    | 9.75634      | 3.9727  |

Totals : 5740.37999 274.06374

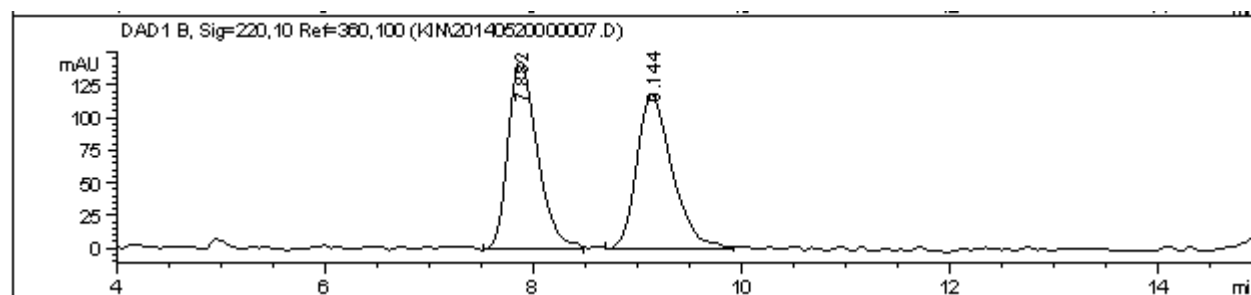

Signal 2: DAD1 B, Sig=220,10 Ref=360,100

| Peak # | RetTime [min] | Type | Width [min] | Area [mAU*s] | Height [mAU] | Area %  |
|--------|---------------|------|-------------|--------------|--------------|---------|
| 1      | 7.882         | BB   | 0.3053      | 2846.78418   | 144.86963    | 50.3484 |
| 2      | 9.144         | BB   | 0.3642      | 2807.38599   | 118.58601    | 49.6516 |

Totals : 5654.17017 263.45564

Enantiomeric ratio: 96:4  
 Rt<sub>1</sub> = 8.0, Rt<sub>2</sub> = 9.4  
 Chiracel OD-H, 6% IPA/Hexanes, 1 mL/min

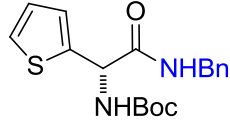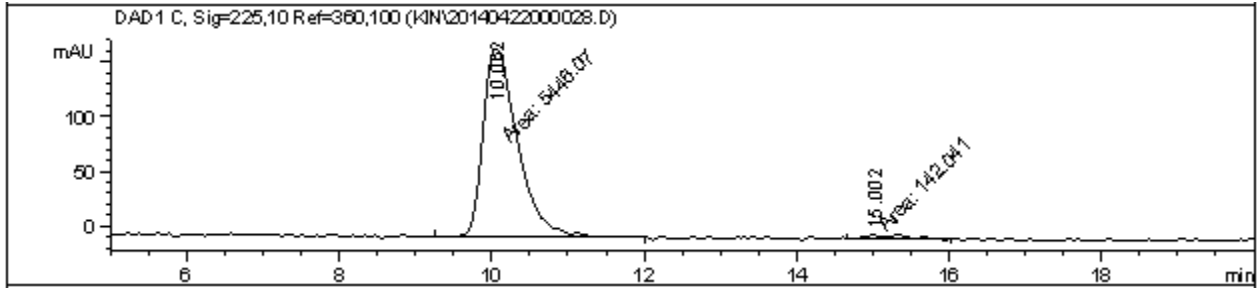

Signal 3: DAD1 C, Sig=225,10 Ref=360,100

| Peak # | RetTime [min] | Type | Width [min] | Area [mAU*s] | Height [mAU] | Area %  |
|--------|---------------|------|-------------|--------------|--------------|---------|
| 1      | 10.062        | MM   | 0.5273      | 5446.06641   | 172.13522    | 97.4582 |
| 2      | 15.002        | MM   | 0.5967      | 142.04095    | 3.96758      | 2.5418  |

Totals : 5588.10736 176.10280

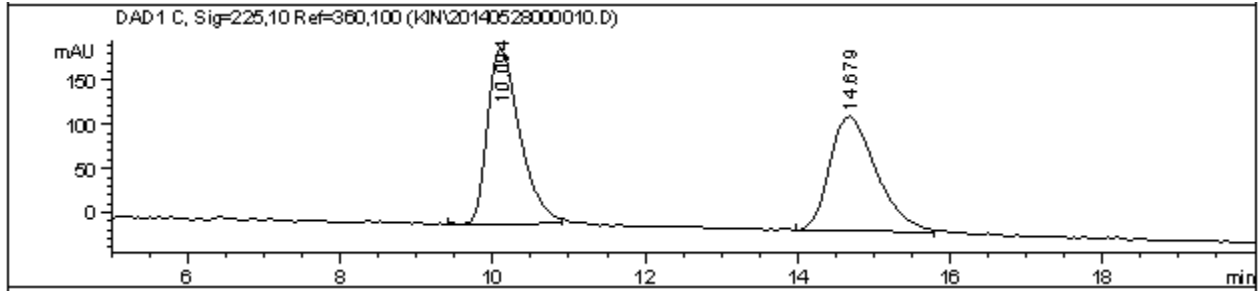

Signal 3: DAD1 C, Sig=225,10 Ref=360,100

| Peak # | RetTime [min] | Type | Width [min] | Area [mAU*s] | Height [mAU] | Area %  |
|--------|---------------|------|-------------|--------------|--------------|---------|
| 1      | 10.094        | BB   | 0.4471      | 5882.38477   | 197.73755    | 51.5364 |
| 2      | 14.679        | BB   | 0.5860      | 5531.64795   | 129.58434    | 48.4636 |

Totals : 1.14140e4 327.32188

Enantiomeric ratio: 97.5:2.5  
 Rt<sub>1</sub> = 10.0, Rt<sub>2</sub> = 15.0  
 Chiracel OD-H, 5% IPA/Hexanes, 1 mL/min

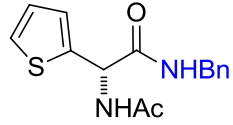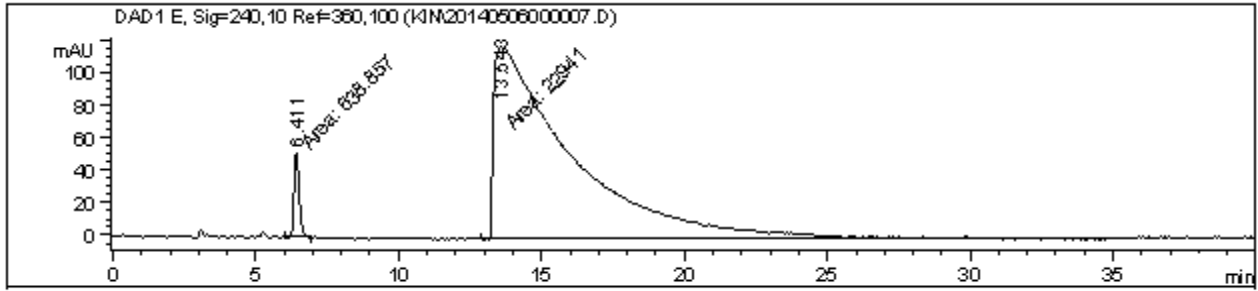

Signal 5: DAD1 E, Sig=240,10 Ref=360,100

| Peak # | RetTime [min] | Type | Width [min] | Area [mAU*s] | Height [mAU] | Area %  |
|--------|---------------|------|-------------|--------------|--------------|---------|
| 1      | 6.411         | MM   | 0.2057      | 638.85657    | 51.75616     | 2.7093  |
| 2      | 13.543        | MM   | 3.2340      | 2.29410e4    | 118.22781    | 97.2907 |

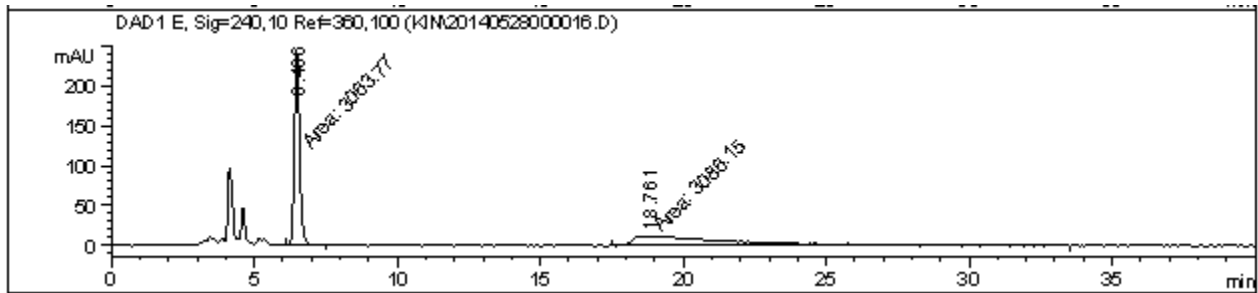

Signal 5: DAD1 E, Sig=240,10 Ref=360,100

| Peak # | RetTime [min] | Type | Width [min] | Area [mAU*s] | Height [mAU] | Area %  |
|--------|---------------|------|-------------|--------------|--------------|---------|
| 1      | 6.486         | MM   | 0.2129      | 3063.77368   | 239.85925    | 49.8181 |
| 2      | 18.761        | MM   | 4.1374      | 3086.14917   | 12.43204     | 50.1819 |

Totals : 6149.92285 252.29129

Enantiomeric ratio: 97.5:2.5  
 Rt<sub>1</sub> = 6.4, Rt<sub>2</sub> = 13.5  
 Chiracel AD-H, 25% IPA/Hexanes, 1 mL/min

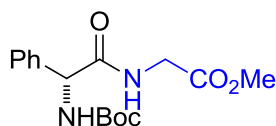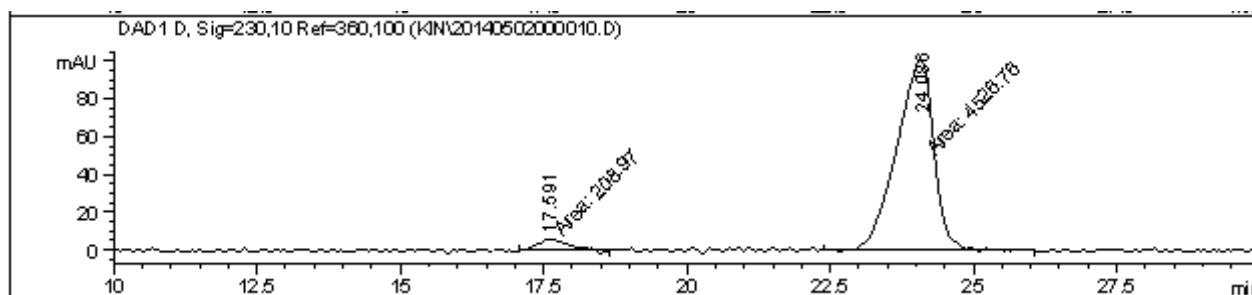

Signal 2: DAD1 B, Sig=220,10 Ref=360,100

| Peak # | RetTime [min] | Type | Width [min] | Area [mAU*s] | Height [mAU] | Area %  |
|--------|---------------|------|-------------|--------------|--------------|---------|
| 1      | 17.602        | MM   | 0.5122      | 499.01599    | 16.23784     | 4.0211  |
| 2      | 24.079        | MM   | 0.7649      | 1.19110e4    | 259.52893    | 95.9789 |

Totals : 1.24100e4 275.76677

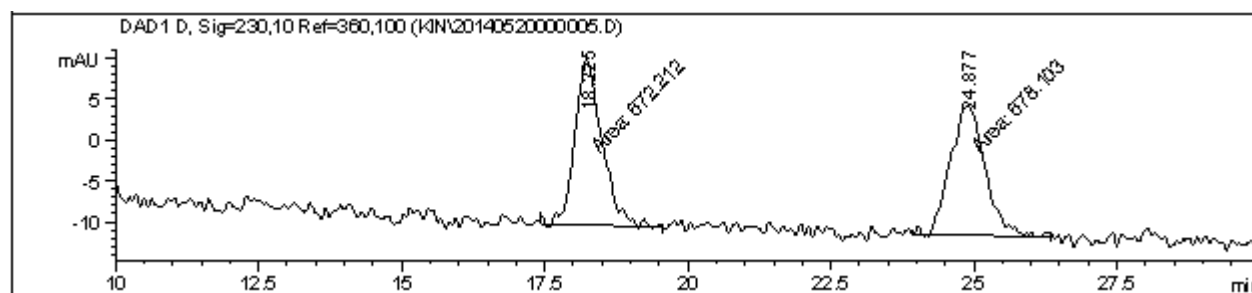

Signal 4: DAD1 D, Sig=230,10 Ref=360,100

| Peak # | RetTime [min] | Type | Width [min] | Area [mAU*s] | Height [mAU] | Area %  |
|--------|---------------|------|-------------|--------------|--------------|---------|
| 1      | 18.225        | MM   | 0.5480      | 672.21161    | 20.44411     | 49.7819 |
| 2      | 24.877        | MM   | 0.7104      | 678.10254    | 15.90893     | 50.2181 |

Totals : 1350.31415 36.35304

Enantiomeric ratio: 96:4  
 Rt<sub>1</sub> = 17.6, Rt<sub>2</sub> = 24.0  
 Chiracel AD-H, 10% IPA/Hexanes, 1 mL/min

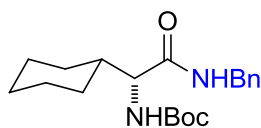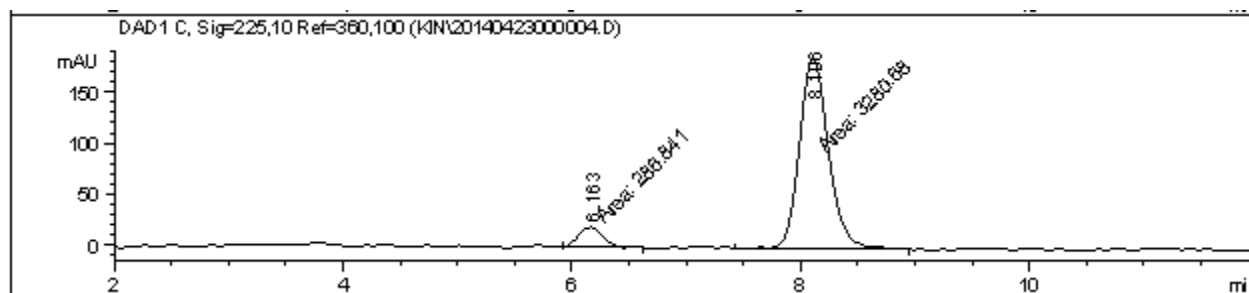

Signal 3: DAD1 C, Sig=225,10 Ref=360,100

| Peak # | RetTime [min] | Type | Width [min] | Area [mAU*s] | Height [mAU] | Area %  |
|--------|---------------|------|-------------|--------------|--------------|---------|
| 1      | 6.163         | MM   | 0.2452      | 286.84122    | 19.49683     | 8.0404  |
| 2      | 8.106         | MM   | 0.2941      | 3280.67505   | 185.92407    | 91.9596 |

Totals : 3567.51627 205.42090

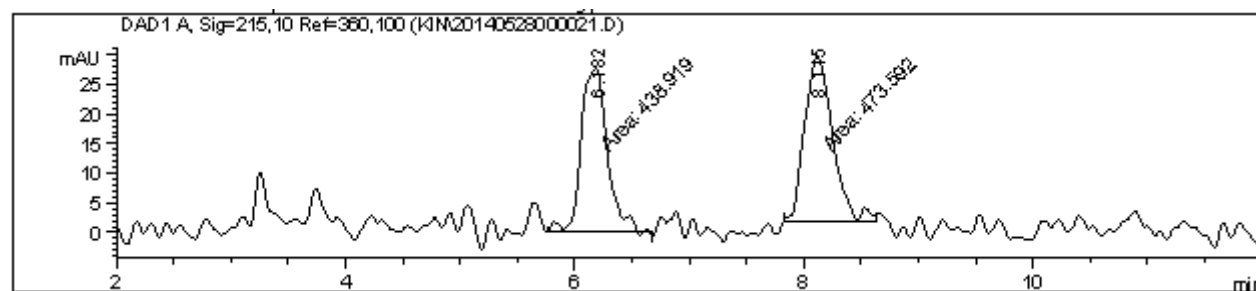

Signal 1: DAD1 A, Sig=215,10 Ref=360,100

| Peak # | RetTime [min] | Type | Width [min] | Area [mAU*s] | Height [mAU] | Area %  |
|--------|---------------|------|-------------|--------------|--------------|---------|
| 1      | 6.182         | MM   | 0.2653      | 438.91867    | 27.57840     | 48.1001 |
| 2      | 8.115         | MM   | 0.2827      | 473.59158    | 27.91964     | 51.8999 |

Totals : 912.51025 55.49803

Enantiomeric ratio: 92:8  
 Rt<sub>1</sub> = 6.1, Rt<sub>2</sub> = 8.1  
 Chiracel AD-H, 10% IPA/Hexanes, 1 mL/min

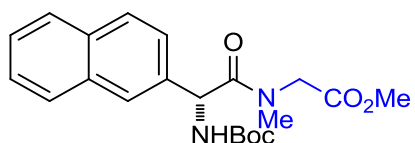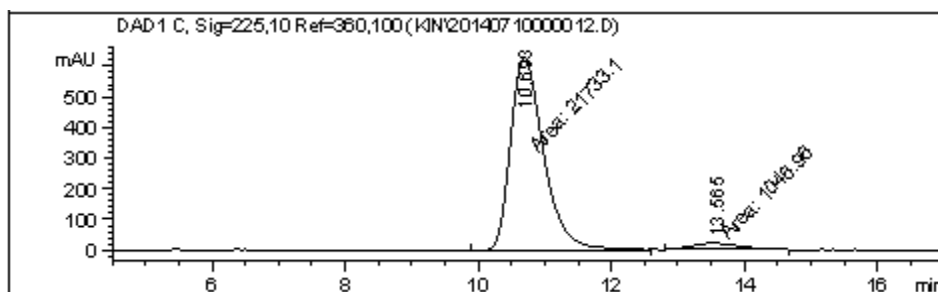

Signal 3: DAD1 C, Sig=225,10 Ref=360,100

| Peak # | RetTime [min] | Type | Width [min] | Area [mAU*s] | Height [mAU] | Area %  |
|--------|---------------|------|-------------|--------------|--------------|---------|
| 1      | 10.693        | MM   | 0.5740      | 2.17331e4    | 631.06171    | 95.4041 |
| 2      | 13.565        | MM   | 0.7872      | 1046.95850   | 22.16533     | 4.5959  |

Totals : 2.27800e4 653.22704

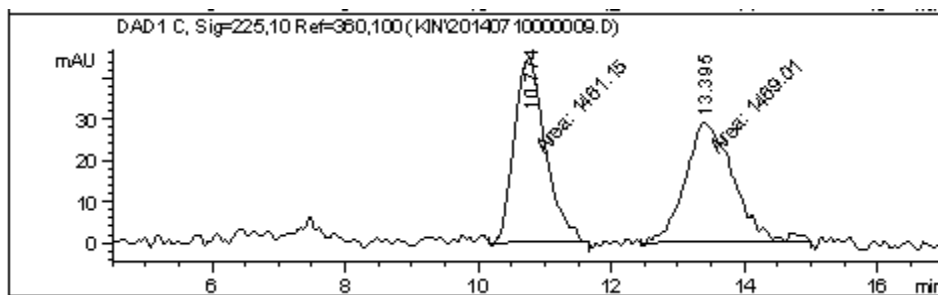

Signal 3: DAD1 C, Sig=225,10 Ref=360,100

| Peak # | RetTime [min] | Type | Width [min] | Area [mAU*s] | Height [mAU] | Area %  |
|--------|---------------|------|-------------|--------------|--------------|---------|
| 1      | 10.774        | MM   | 0.5428      | 1461.14636   | 44.86652     | 49.8657 |
| 2      | 13.395        | MM   | 0.8402      | 1469.01428   | 29.13858     | 50.1343 |

Totals : 2930.16064 74.00510

Enantiomeric ratio: 95.5:4.5  
 Rt<sub>1</sub> = 10.7, Rt<sub>2</sub> = 13.5  
 Chiracel OD-H, 10% IPA/Hexanes, 1 mL/min
